# Supplementary material for: Chemoenzymatic synthesis of the macrolide antibiotic (−)-A26771B
Source: Royal Society of Chemistry journal article supplement (doi:10.1039/c4ra05399k), 2014-01-01

Supplementary material

**Chemoenzymatic Synthesis of the Macrolide Antibiotic (-)-A26771B**

Sucheta Chatterjee,<sup>#</sup> Anubha Sharma<sup>#</sup> and Subrata Chattopadhyay\*

Bio-Organic Division, Bhabha Atomic Research Centre, Mumbai 400 085, India

## Content

| <b>s.no</b> | <b>Title</b>                                           | <b>Page no.</b> |
|-------------|--------------------------------------------------------|-----------------|
| 1           | <sup>1</sup> H NMR of (±)- <b>3</b>                    | 5               |
| 2           | <sup>13</sup> C NMR of (±)- <b>3</b>                   | 6               |
| 3           | <sup>1</sup> H NMR of ( <i>S</i> )- <b>3</b>           | 7               |
| 4           | <sup>13</sup> C NMR of compound ( <i>S</i> )- <b>3</b> | 8               |
| 5           | <sup>1</sup> H NMR of compound <b>4</b>                | 9               |
| 6           | <sup>13</sup> C NMR of compound <b>4</b>               | 10              |
| 7           | <sup>1</sup> H NMR of compound ( <i>S</i> )- <b>3</b>  | 11              |
| 8           | <sup>13</sup> C NMR of compound ( <i>S</i> )- <b>3</b> | 12              |
| 9           | <sup>1</sup> H NMR of compound <b>5</b>                | 13              |
| 10          | <sup>13</sup> C NMR of compound <b>5</b>               | 14              |
| 11          | <sup>1</sup> H NMR of compound <b>6</b>                | 15              |
| 12          | <sup>13</sup> C NMR of compound <b>6</b>               | 16              |
| 13          | <sup>1</sup> H NMR of compound <b>7</b>                | 17              |
| 14          | <sup>13</sup> C NMR of compound <b>7</b>               | 18              |
| 15          | <sup>1</sup> H NMR compound <b>8</b>                   | 19              |

|    |                                                         |    |
|----|---------------------------------------------------------|----|
| 16 | <sup>13</sup> C NMR of compound <b>8</b>                | 20 |
| 17 | <sup>1</sup> H NMR compound <b>9</b>                    | 21 |
| 18 | <sup>13</sup> C NMR of compound <b>9</b>                | 22 |
| 19 | <sup>1</sup> H NMR of compound ( <b>3S</b> )- <b>8</b>  | 23 |
| 20 | <sup>13</sup> C NMR of compound ( <b>3S</b> )- <b>8</b> | 24 |
| 21 | <sup>1</sup> H NMR compound <b>10</b>                   | 25 |
| 22 | <sup>13</sup> C NMR of compound <b>10</b>               | 26 |
| 23 | <sup>1</sup> H NMR compound <b>11</b>                   | 27 |
| 24 | <sup>13</sup> C NMR of compound <b>11</b>               | 28 |
| 25 | <sup>1</sup> H NMR compound <b>12</b>                   | 29 |
| 26 | <sup>13</sup> C NMR of compound <b>12</b>               | 30 |
| 27 | <sup>1</sup> H NMR compound <b>13</b>                   | 31 |
| 28 | <sup>13</sup> C NMR of compound <b>13</b>               | 32 |
| 29 | <sup>1</sup> H NMR compound <b>14</b>                   | 33 |
| 30 | <sup>13</sup> C NMR of compound <b>14</b>               | 34 |
| 31 | <sup>1</sup> H NMR compound <b>15</b>                   | 35 |
| 32 | <sup>13</sup> C NMR of compound <b>15</b>               | 36 |
| 33 | <sup>1</sup> H NMR compound <b>16</b>                   | 37 |

|    |                                           |    |
|----|-------------------------------------------|----|
| 34 | <sup>13</sup> C NMR of compound <b>16</b> | 38 |
| 35 | <sup>1</sup> H NMR compound <b>1a</b>     | 39 |
| 36 | <sup>13</sup> C NMR of compound <b>1a</b> | 40 |
| 37 | <sup>1</sup> H NMR compound <b>17</b>     | 41 |
| 38 | <sup>13</sup> C NMR of compound <b>17</b> | 42 |
| 39 | <sup>1</sup> H NMR compound <b>18</b>     | 43 |
| 40 | <sup>13</sup> C NMR of compound <b>18</b> | 44 |
| 41 | <sup>1</sup> H NMR compound <b>19</b>     | 45 |
| 42 | <sup>13</sup> C NMR of compound <b>19</b> | 46 |
| 43 | <sup>1</sup> H NMR compound <b>20</b>     | 47 |
| 44 | <sup>13</sup> C NMR of compound <b>20</b> | 48 |
| 45 | <sup>1</sup> H NMR compound <b>1</b>      | 49 |
| 46 | <sup>13</sup> C NMR of compound <b>1</b>  | 50 |

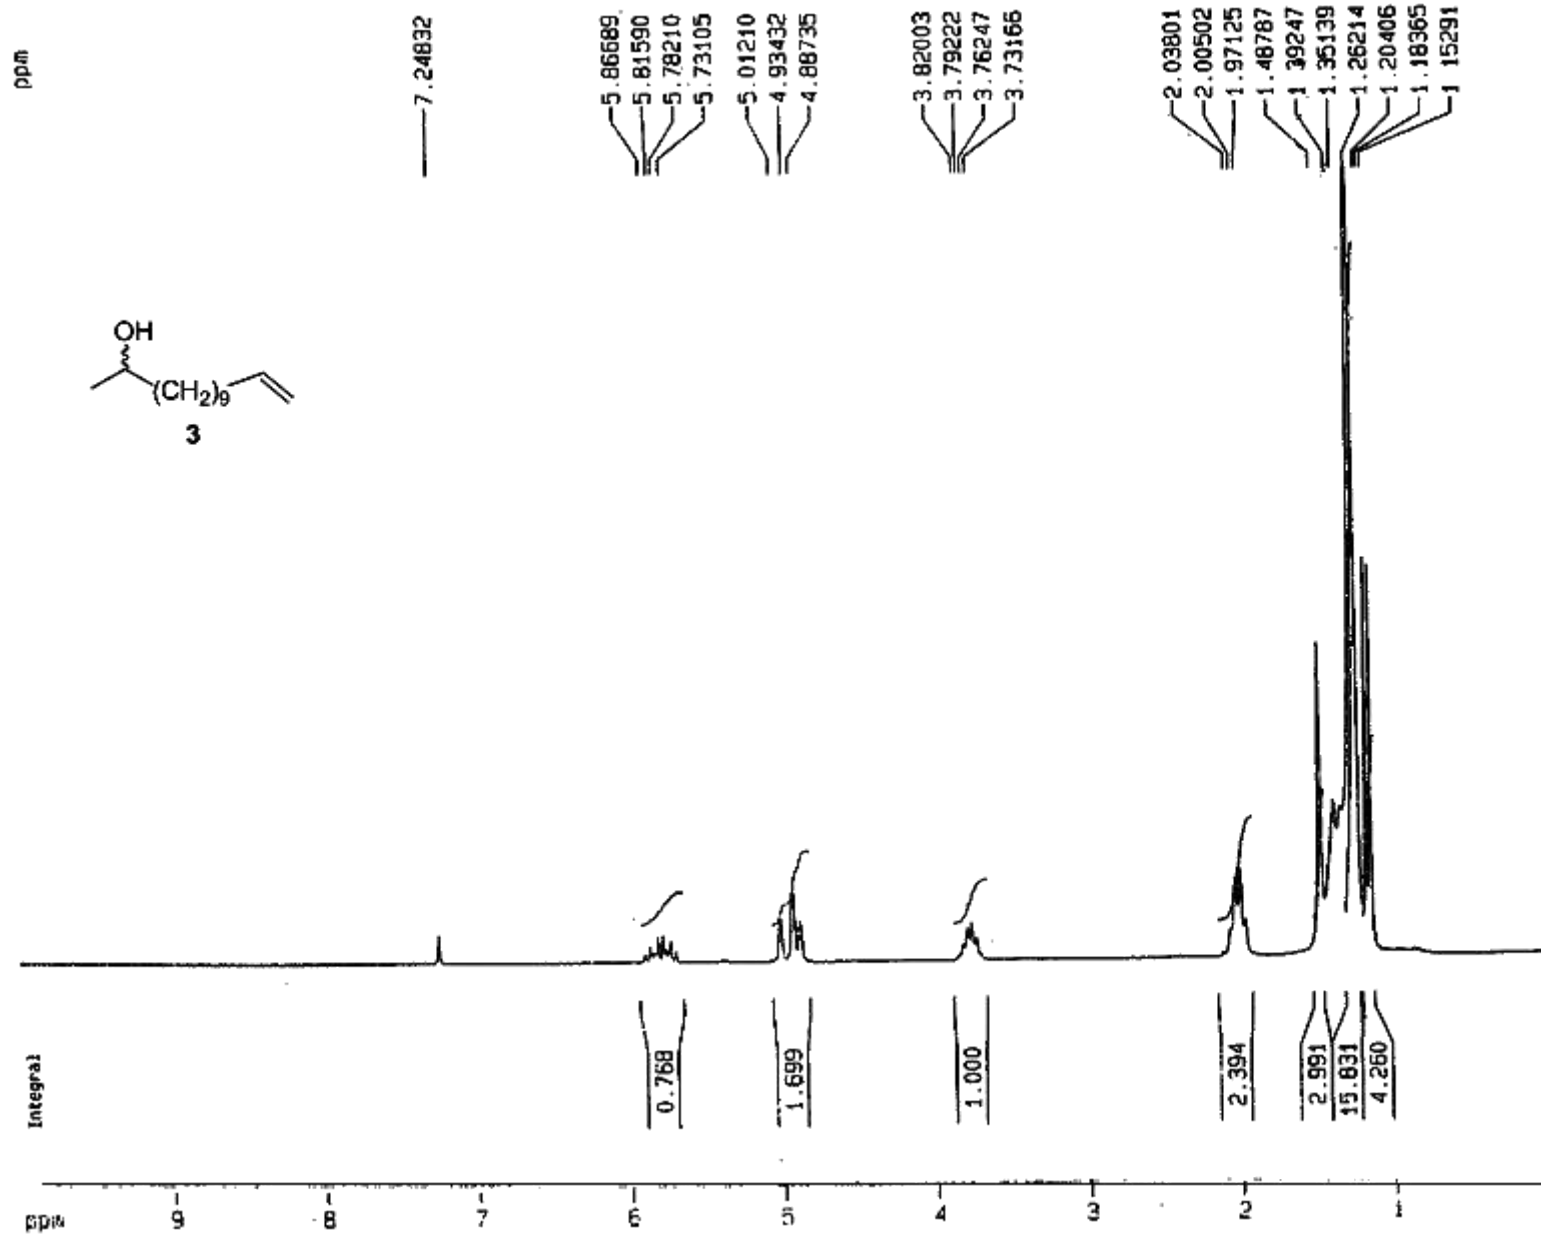

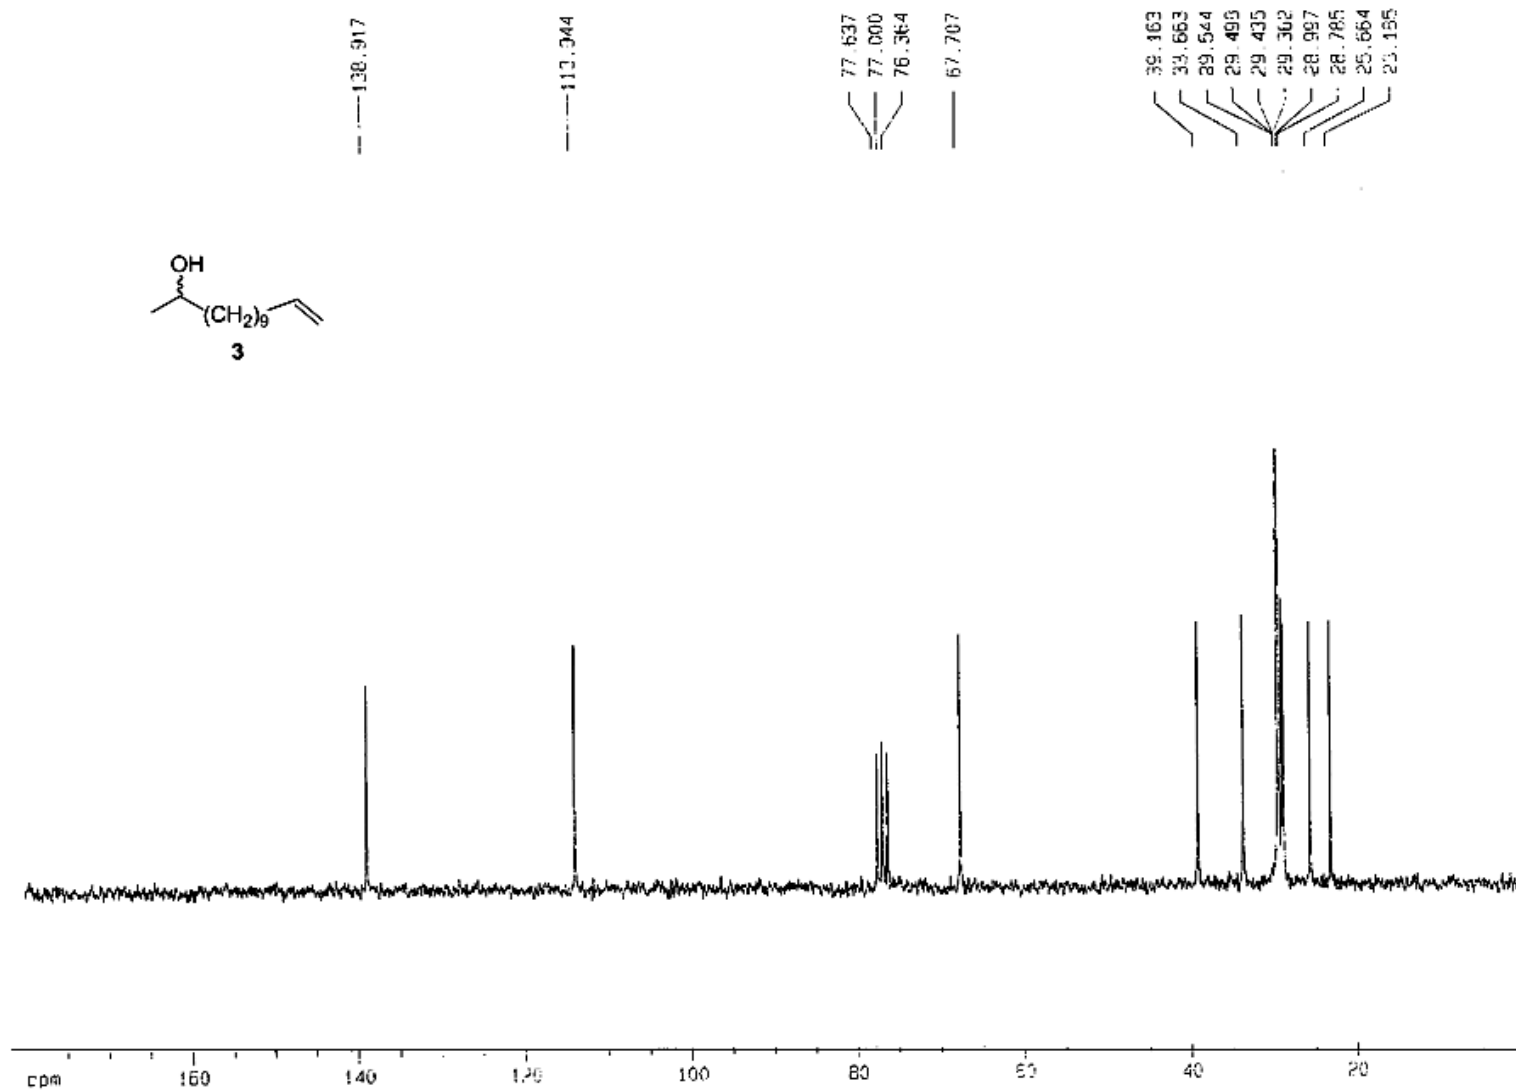

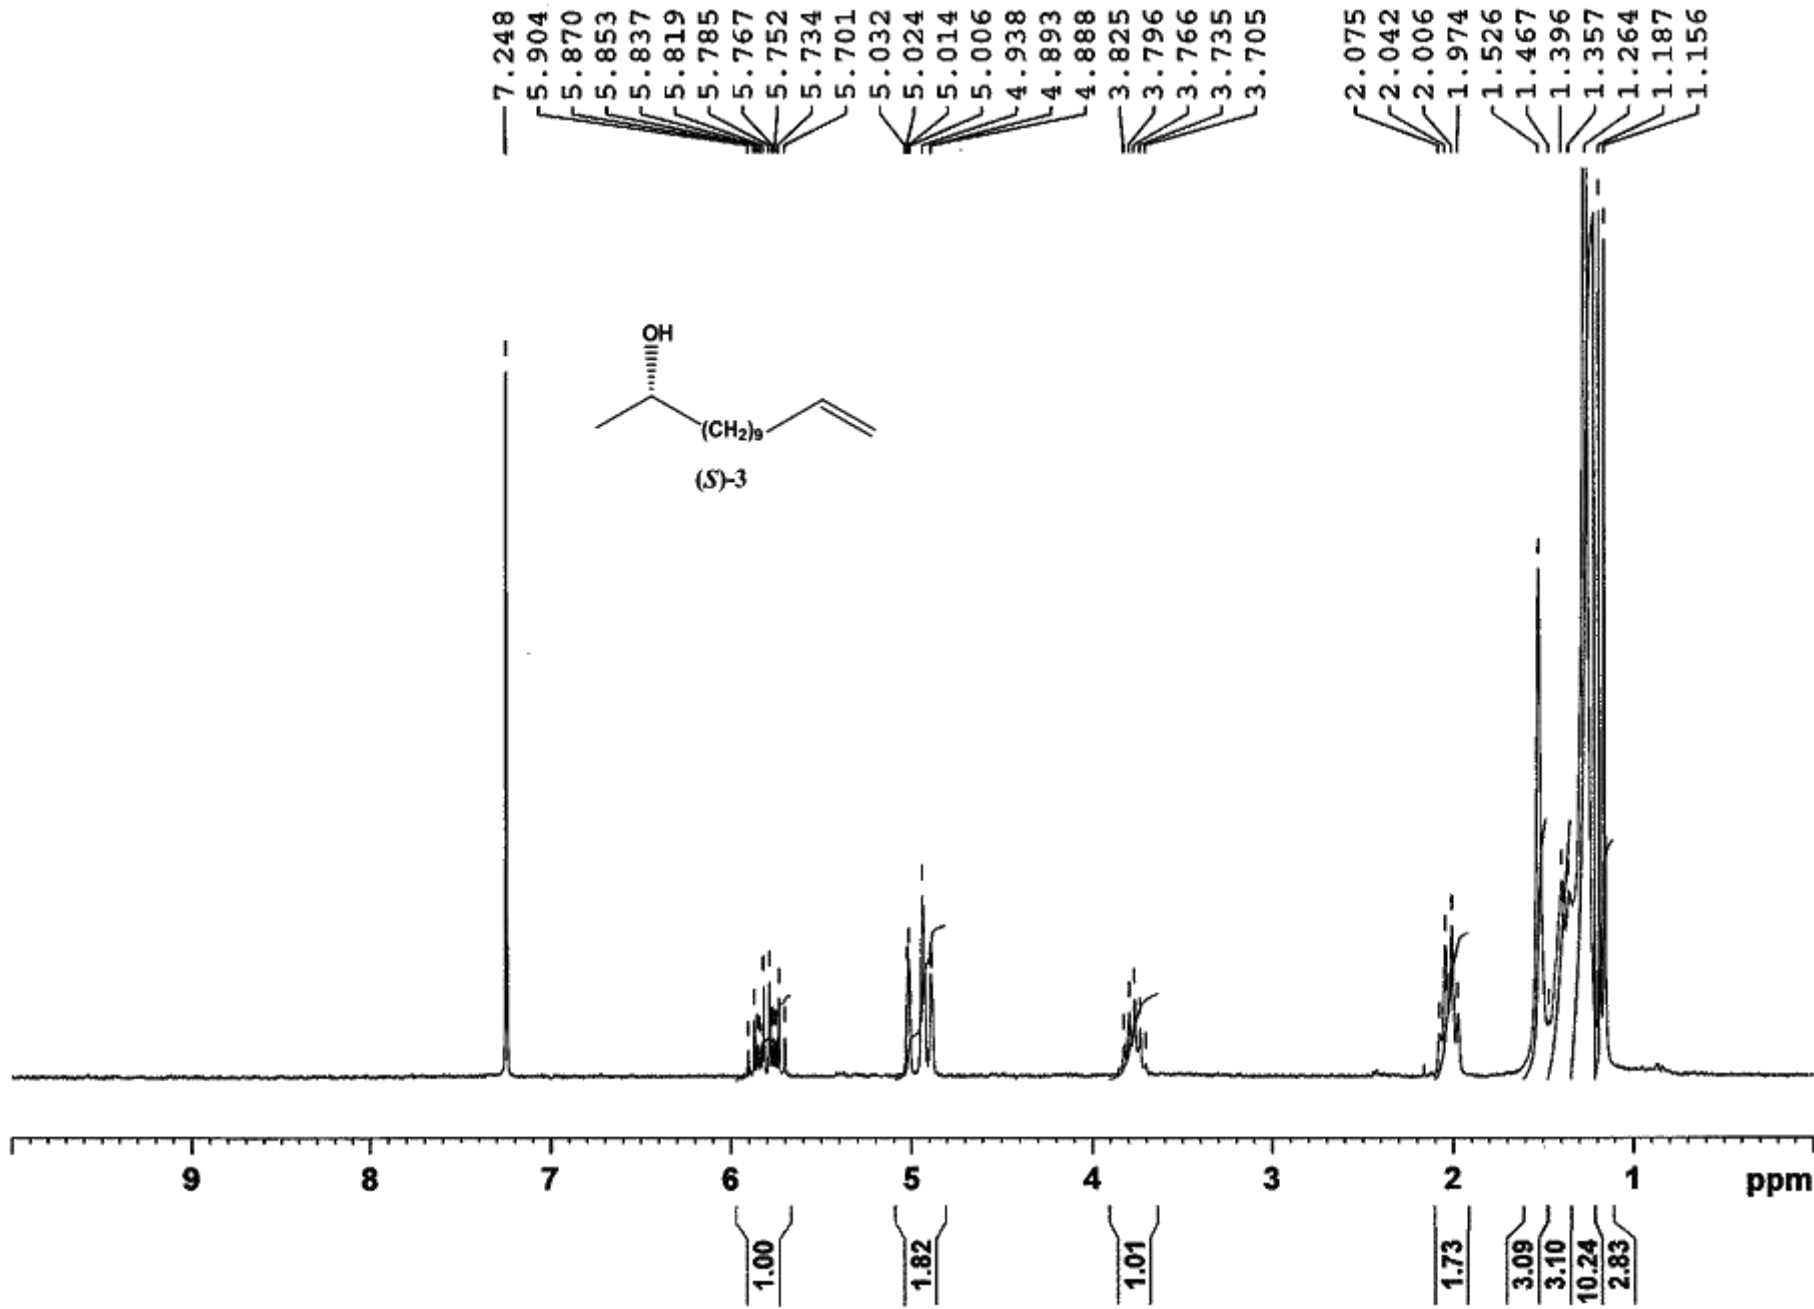

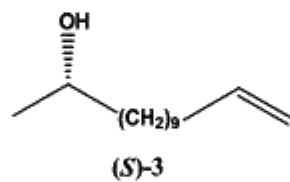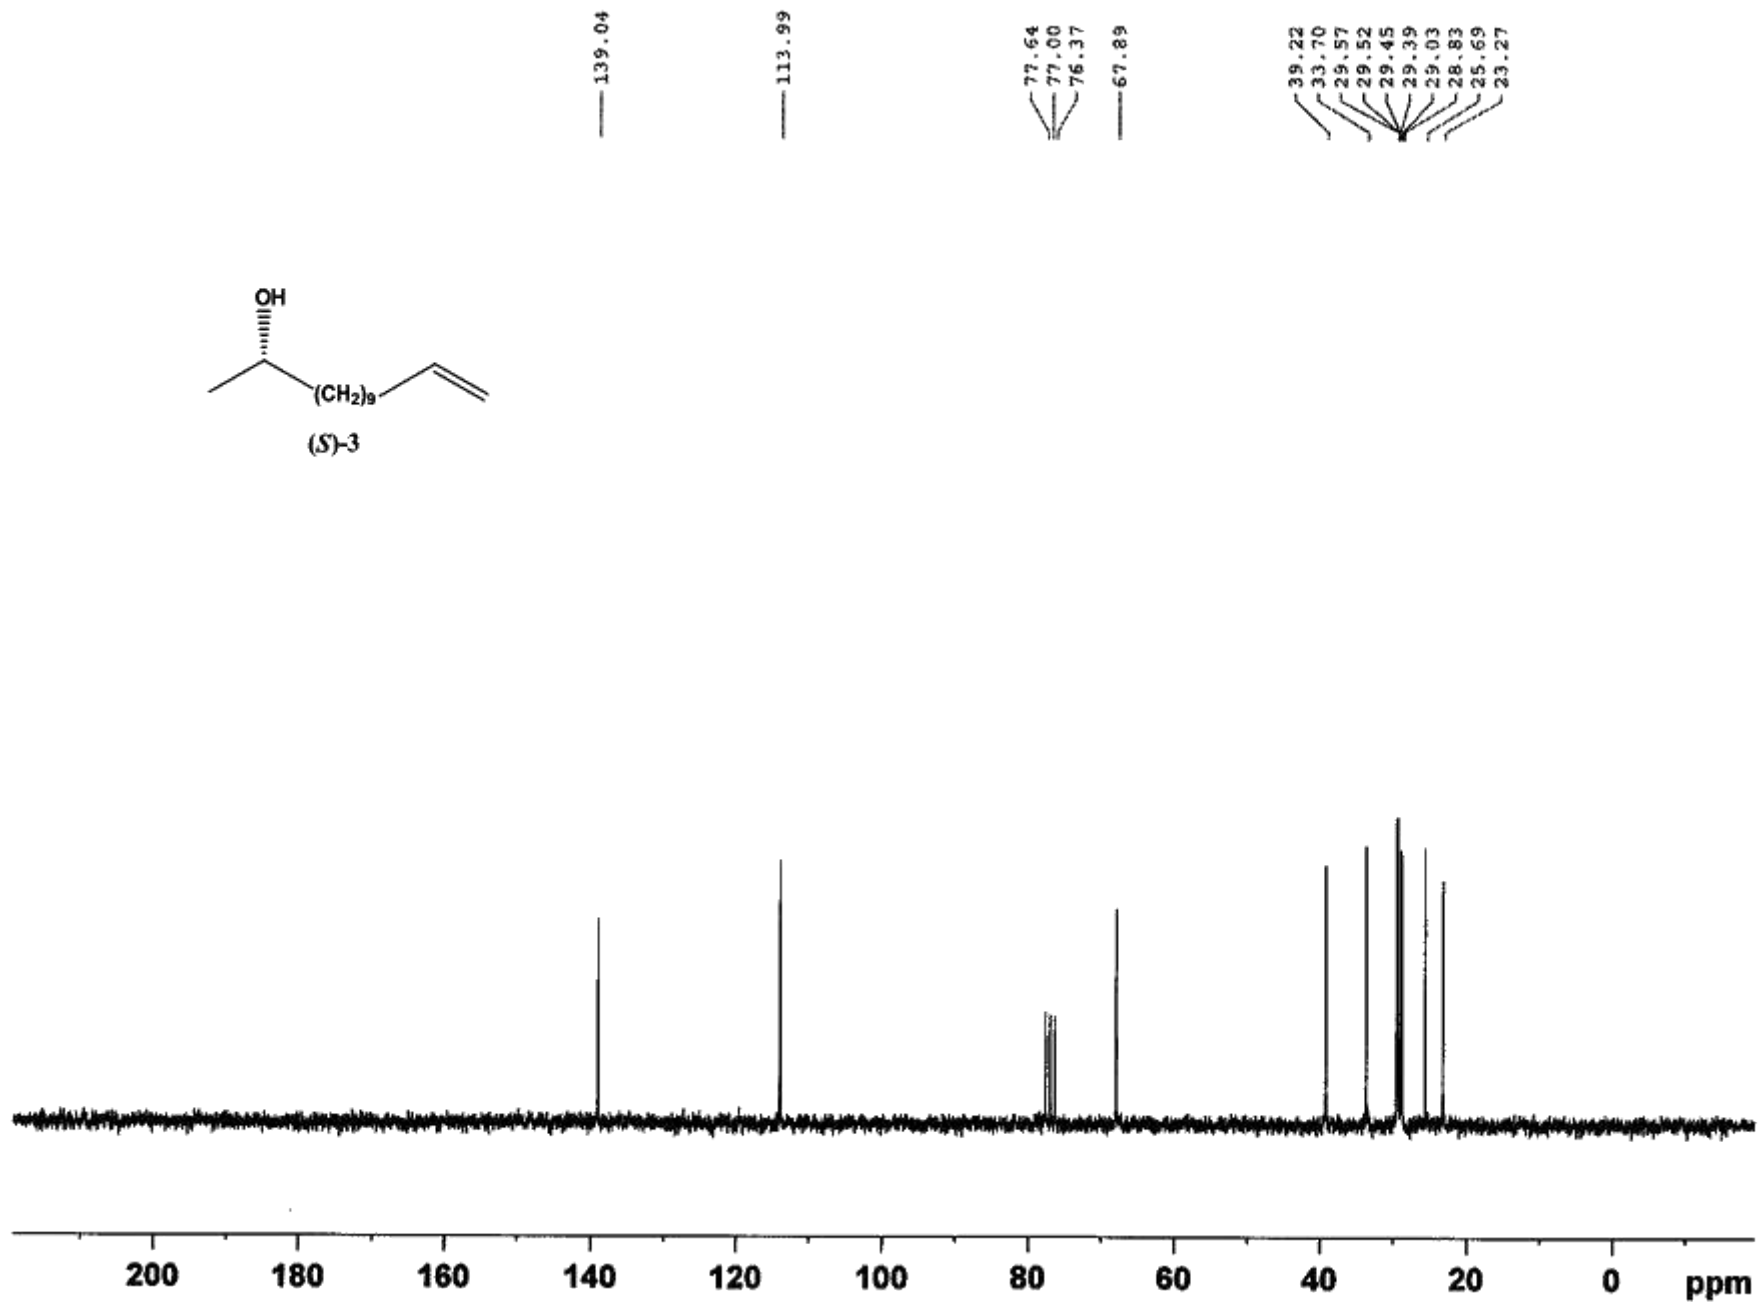



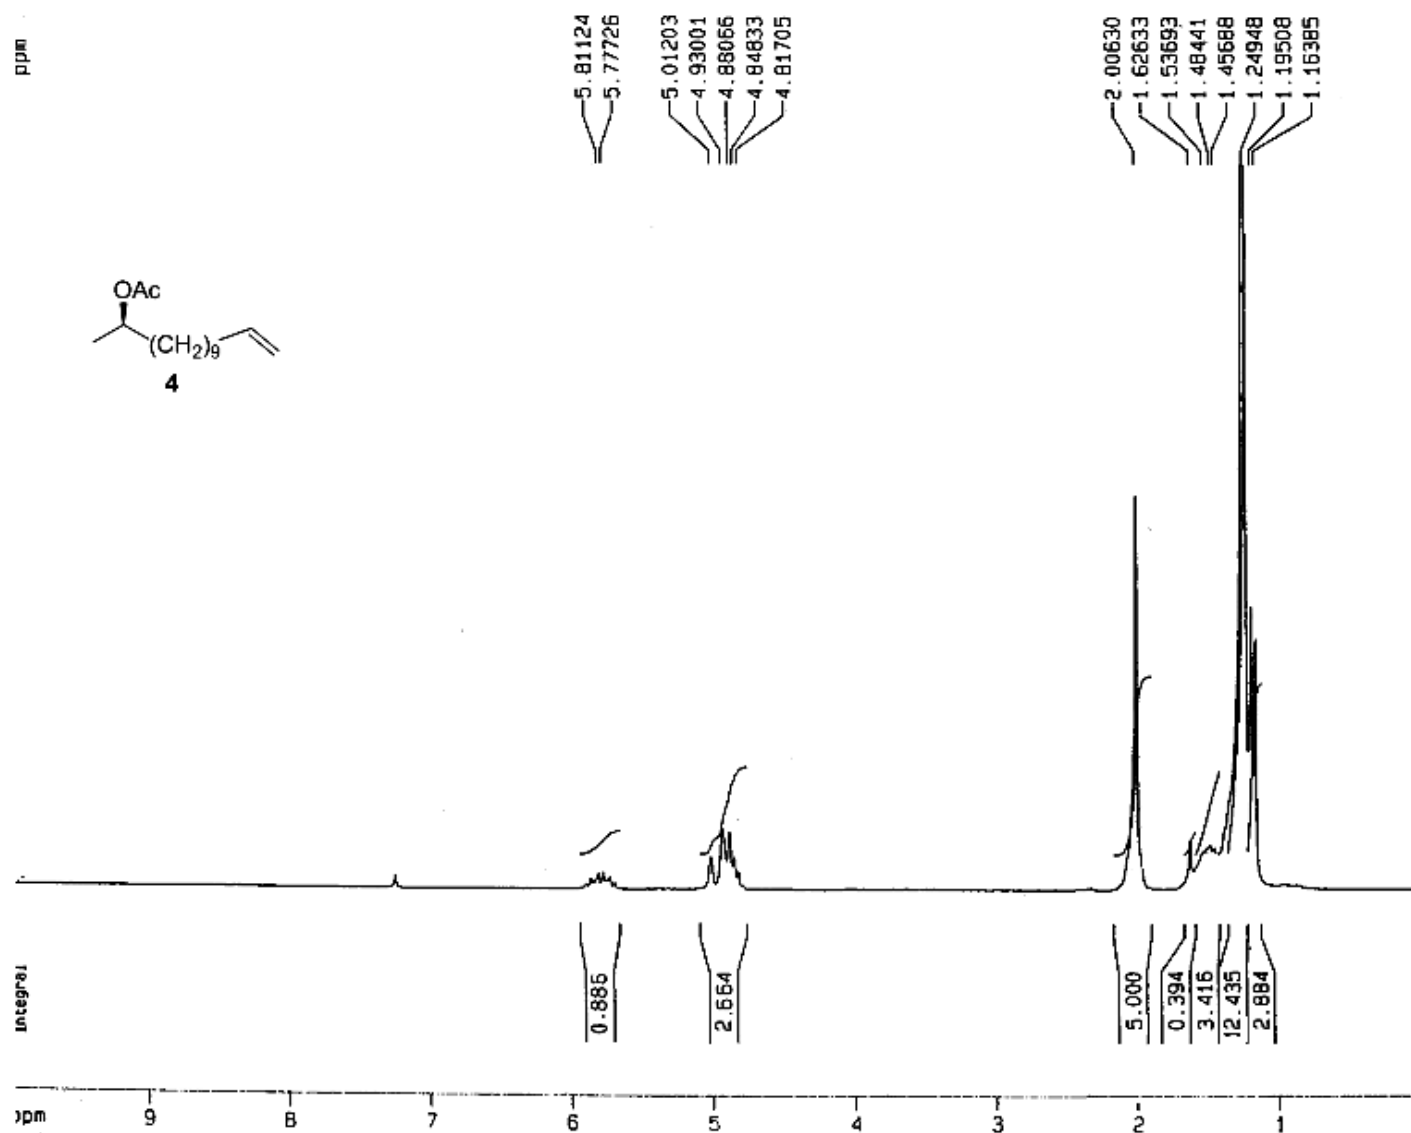

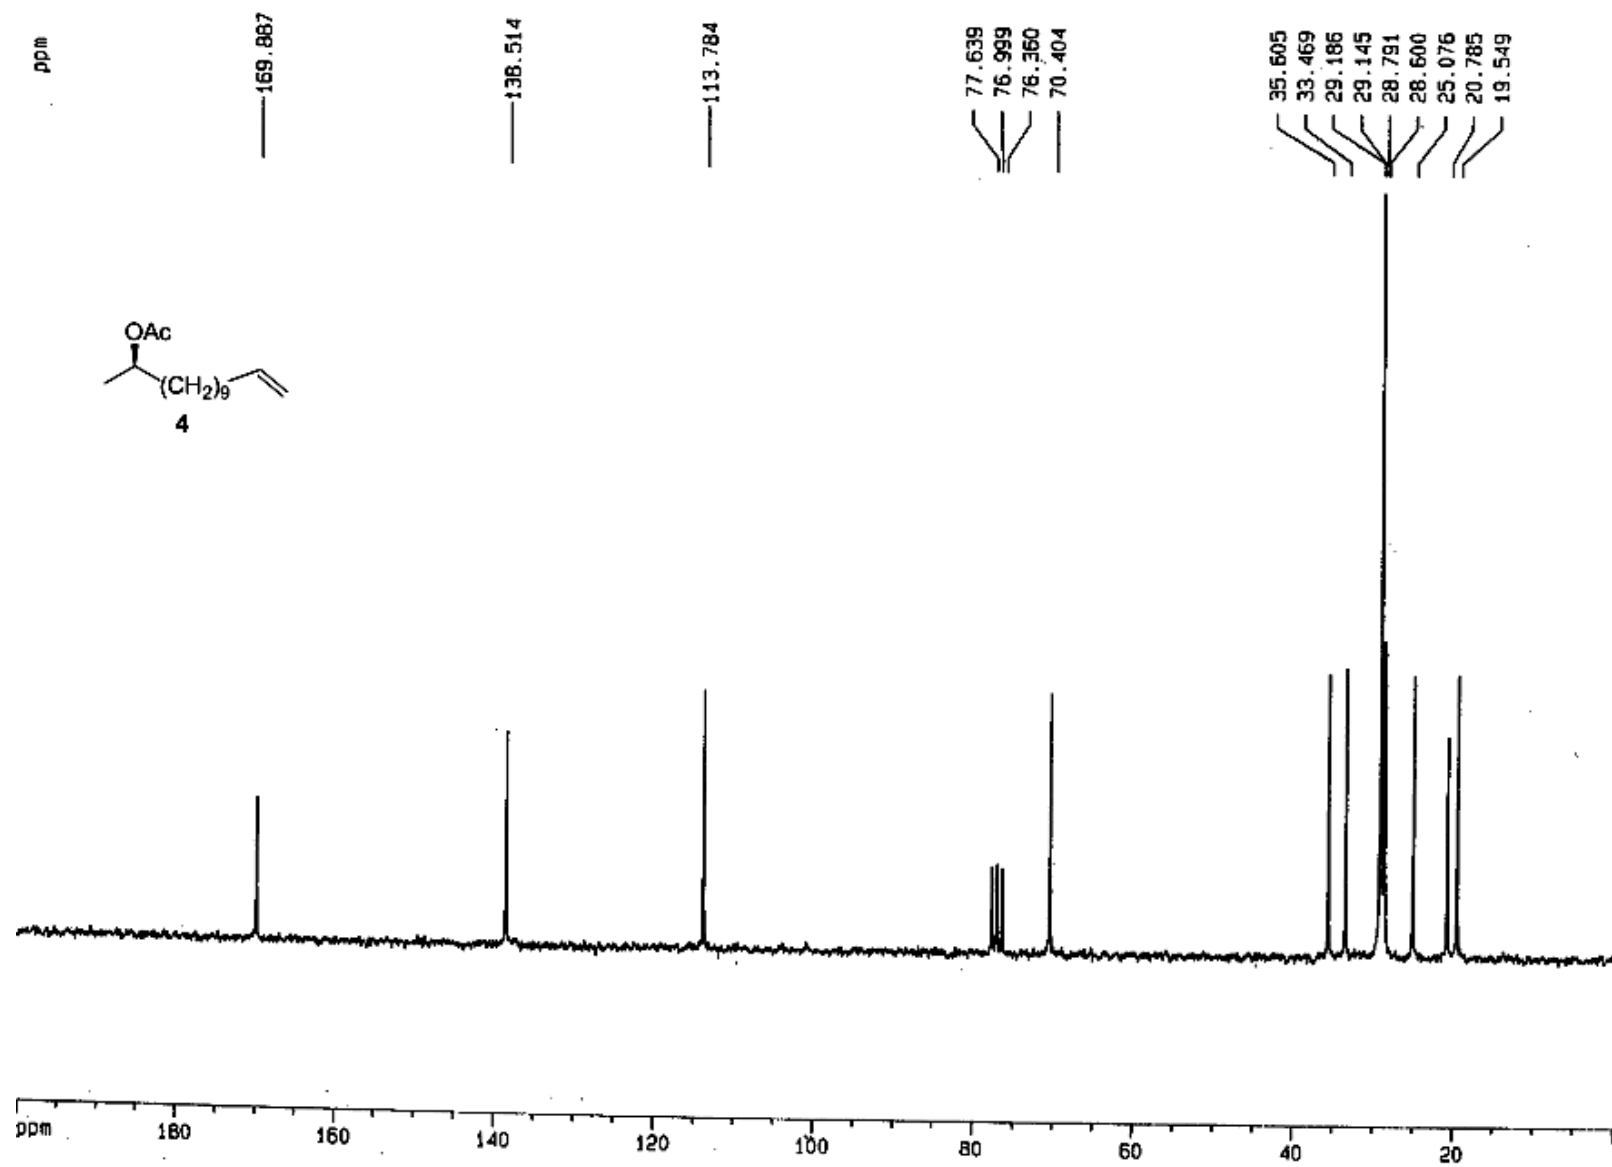

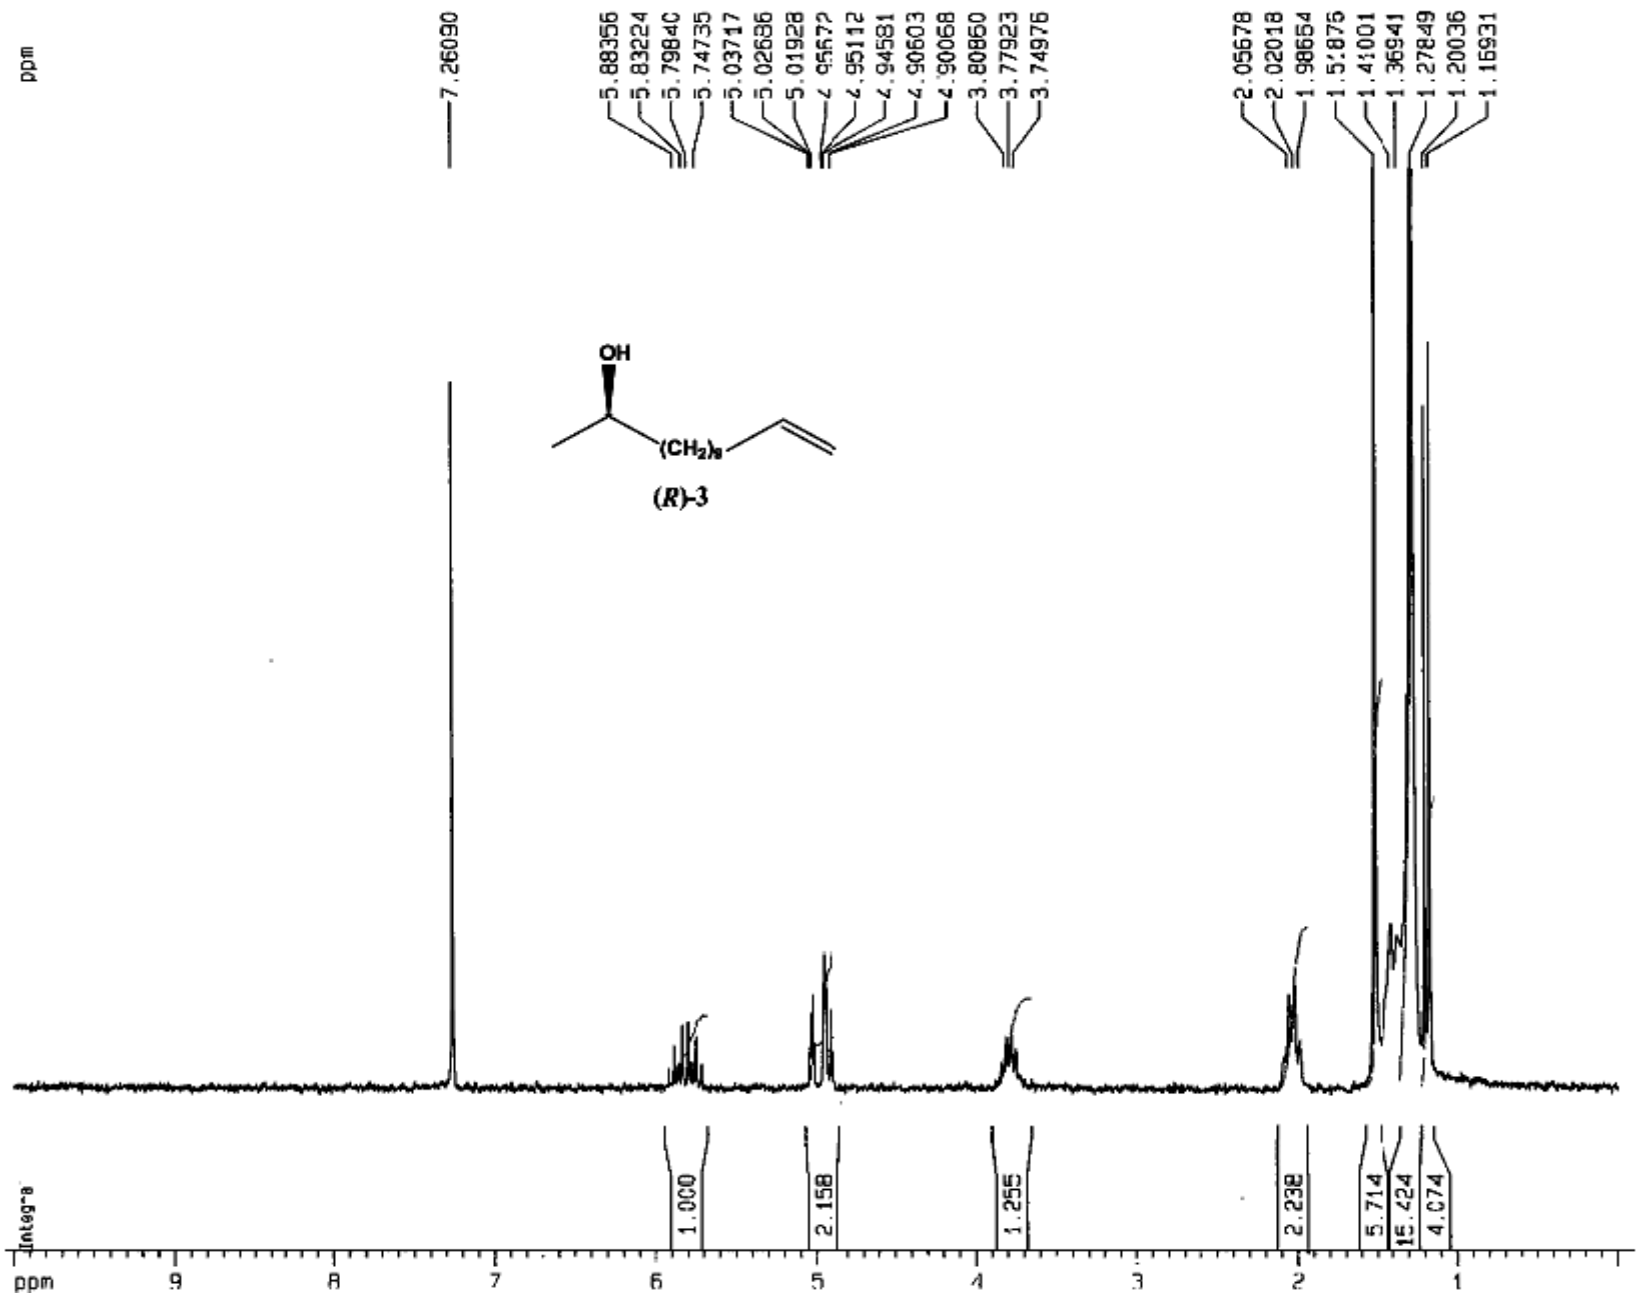

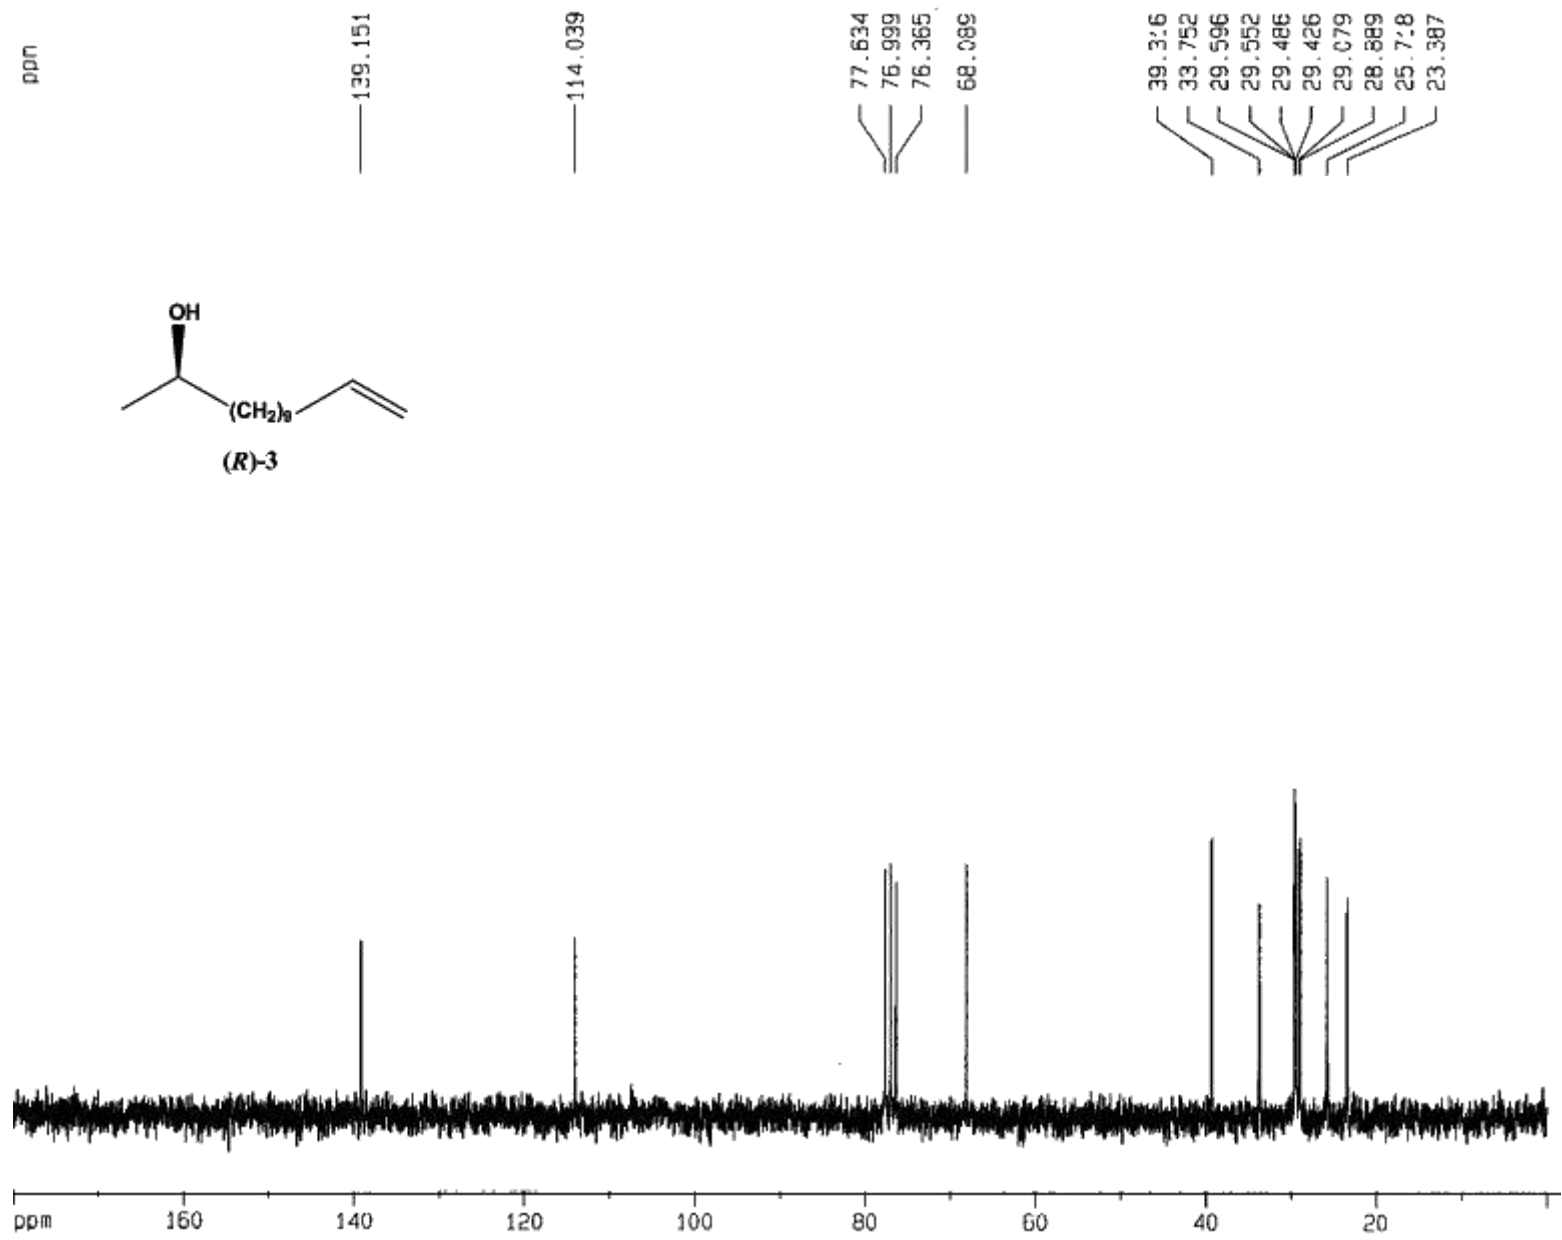

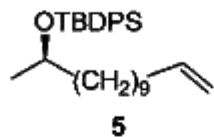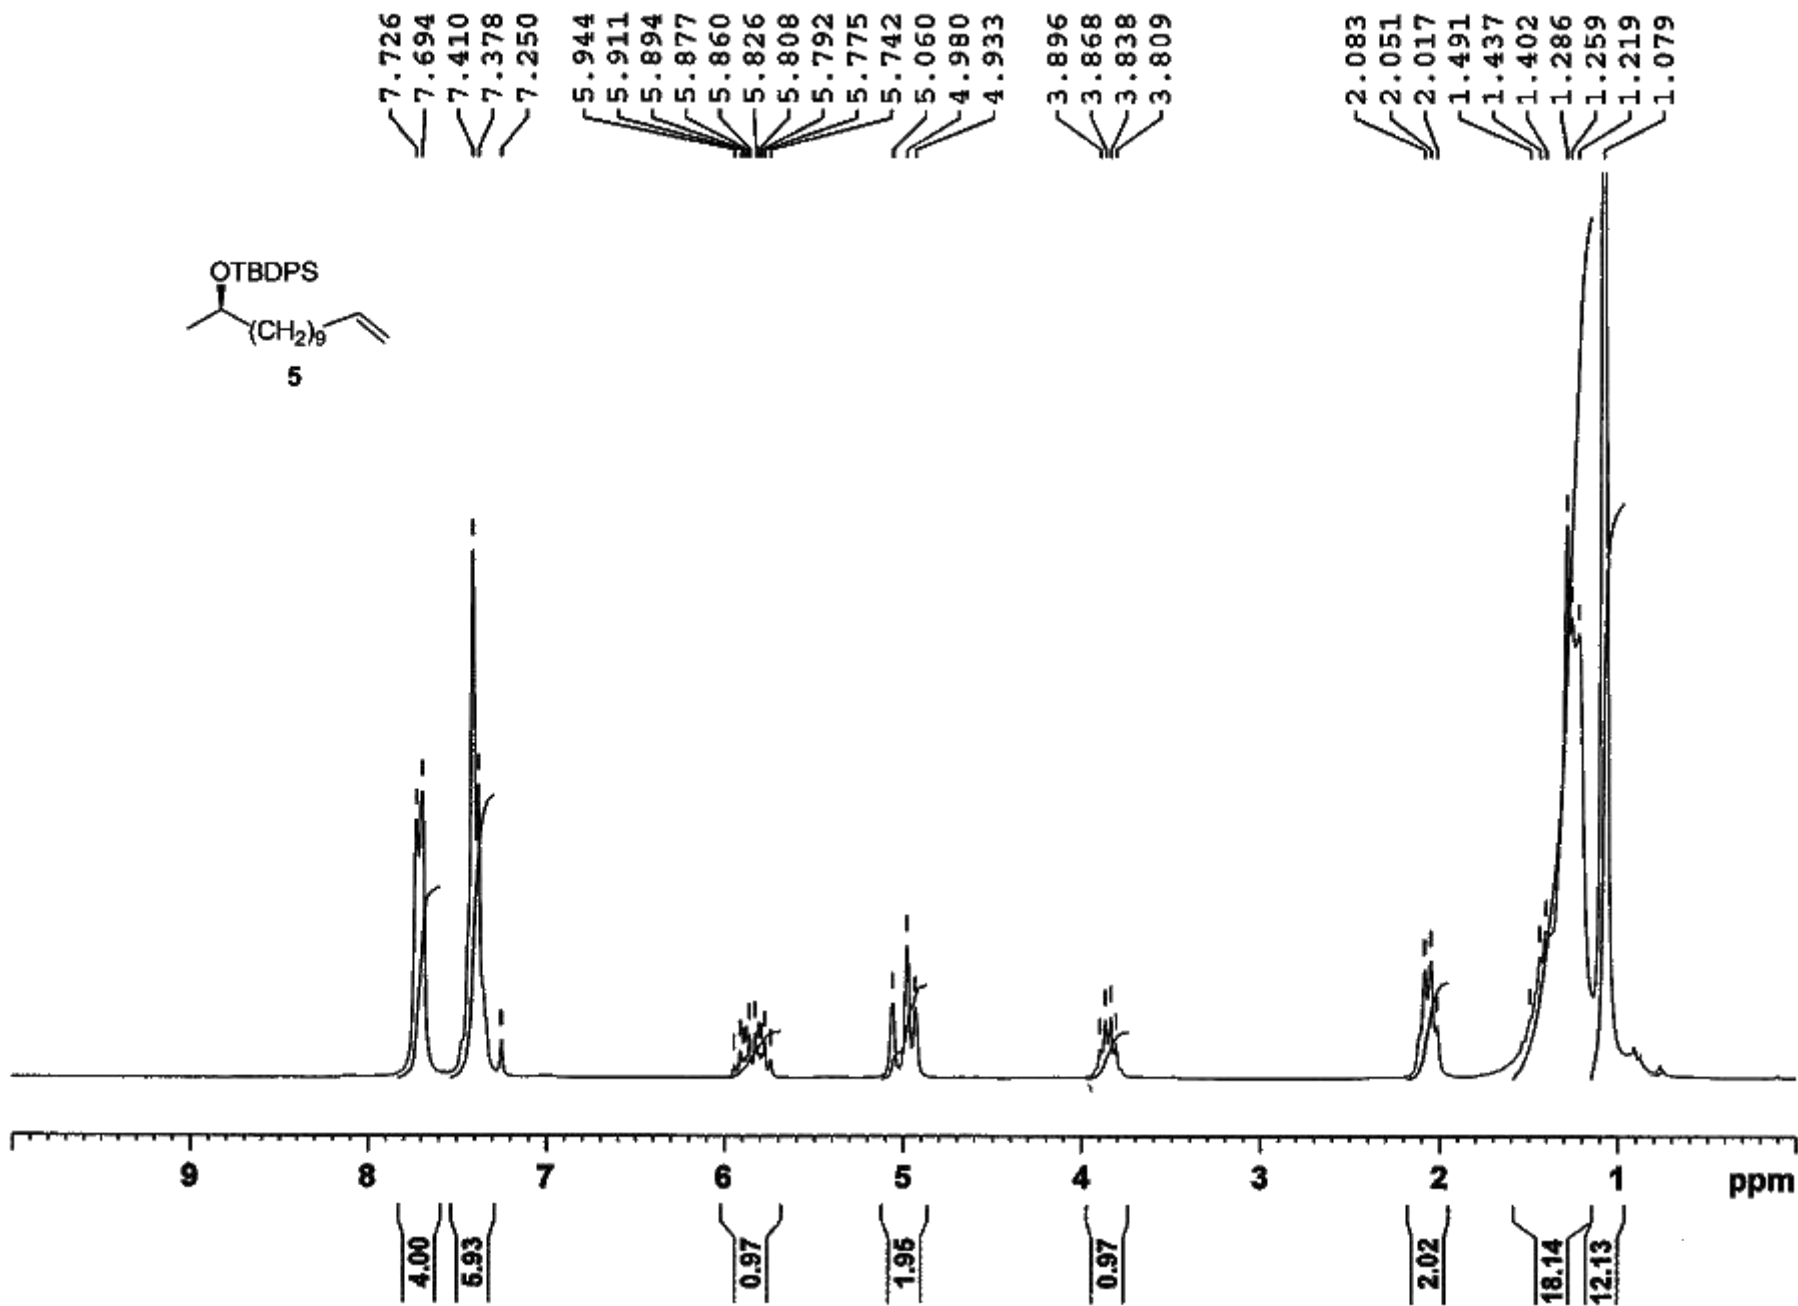

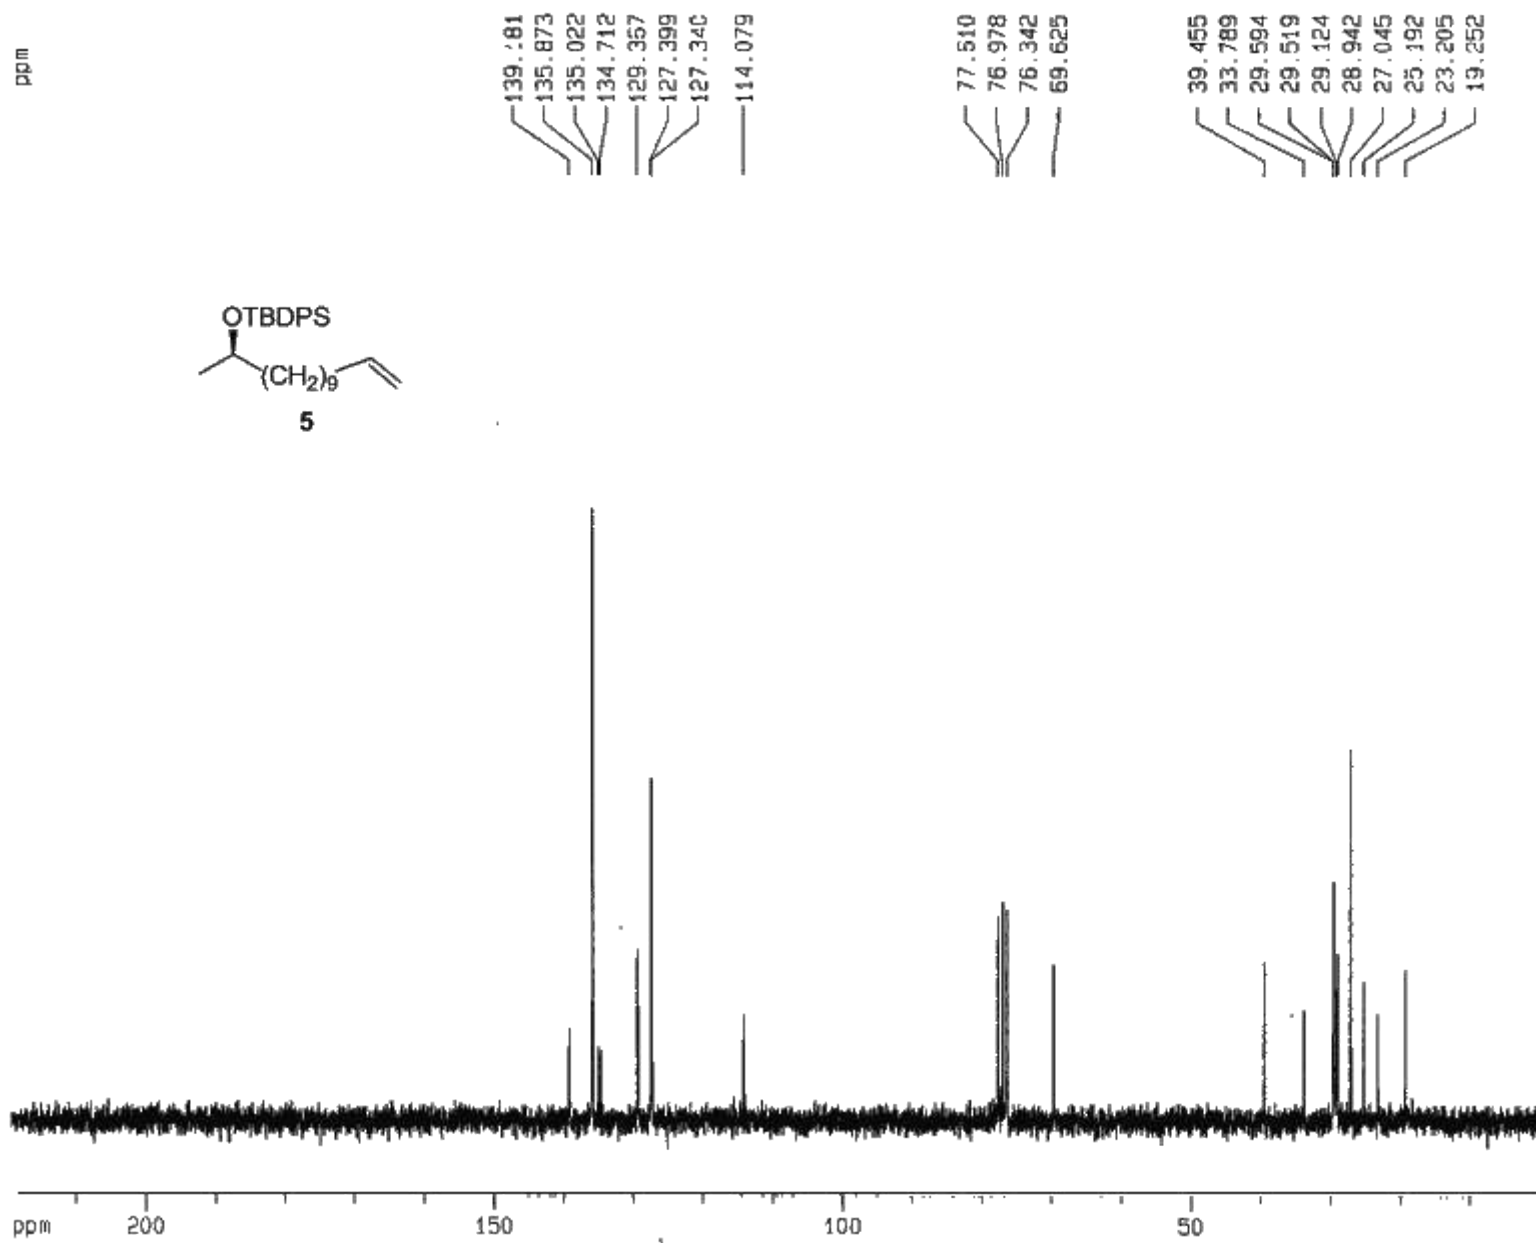



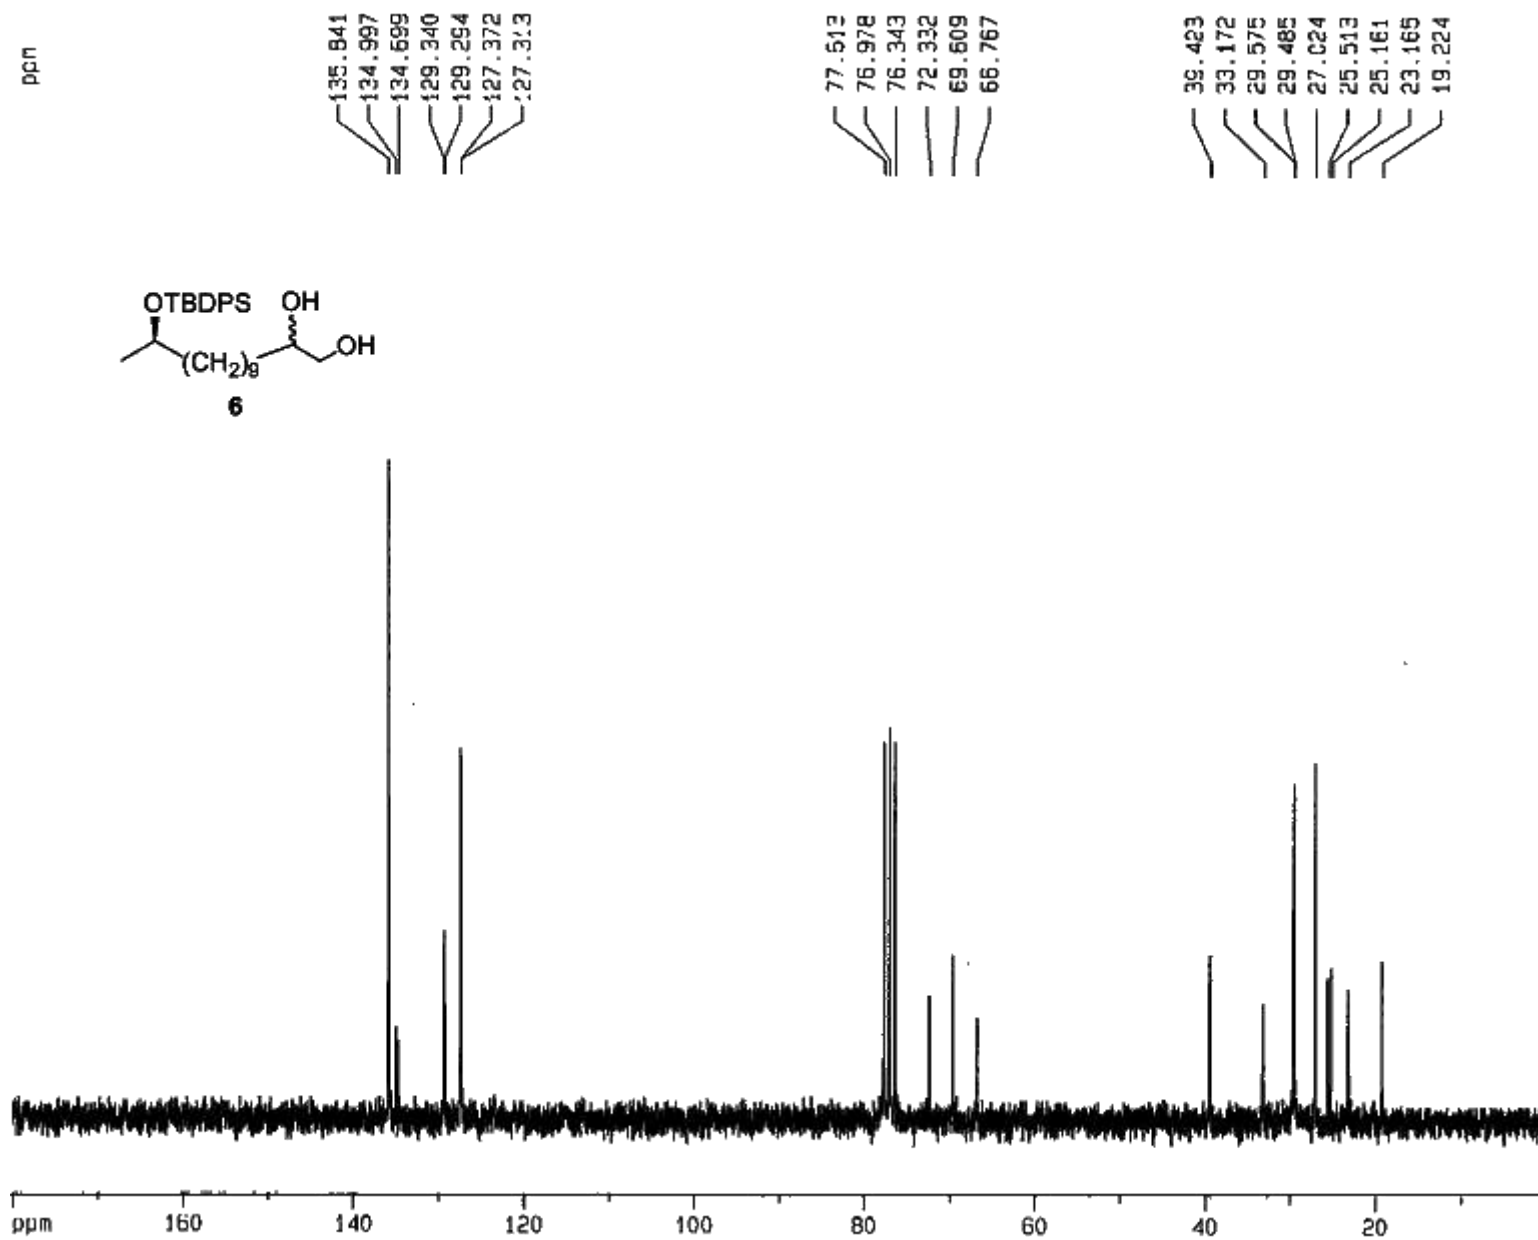





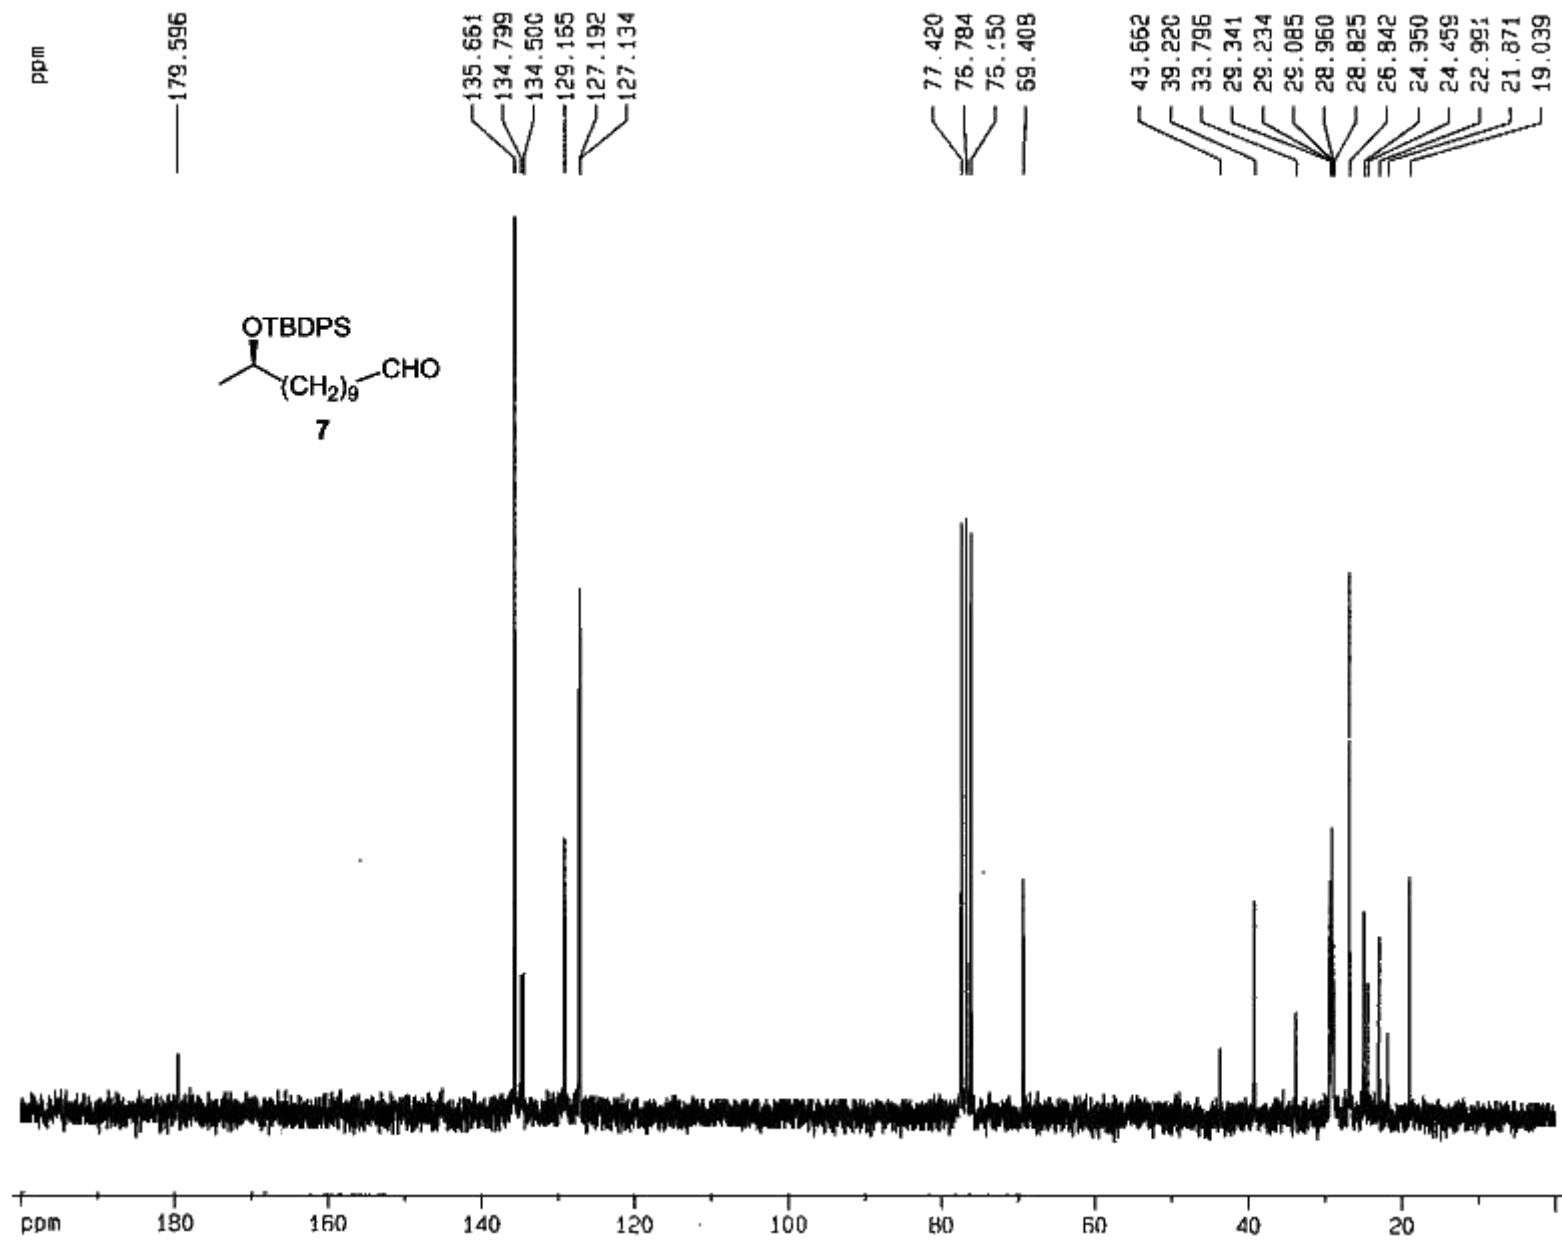



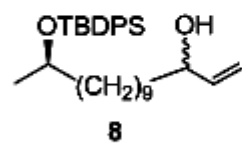

141.30  
 135.84  
 134.92  
 134.59  
 129.36  
 129.30  
 127.38  
 127.32

114.47

77.63  
 77.00  
 76.36  
 73.22  
 69.56

39.39  
 37.00  
 29.51  
 27.01  
 25.30  
 25.17  
 23.20  
 19.22

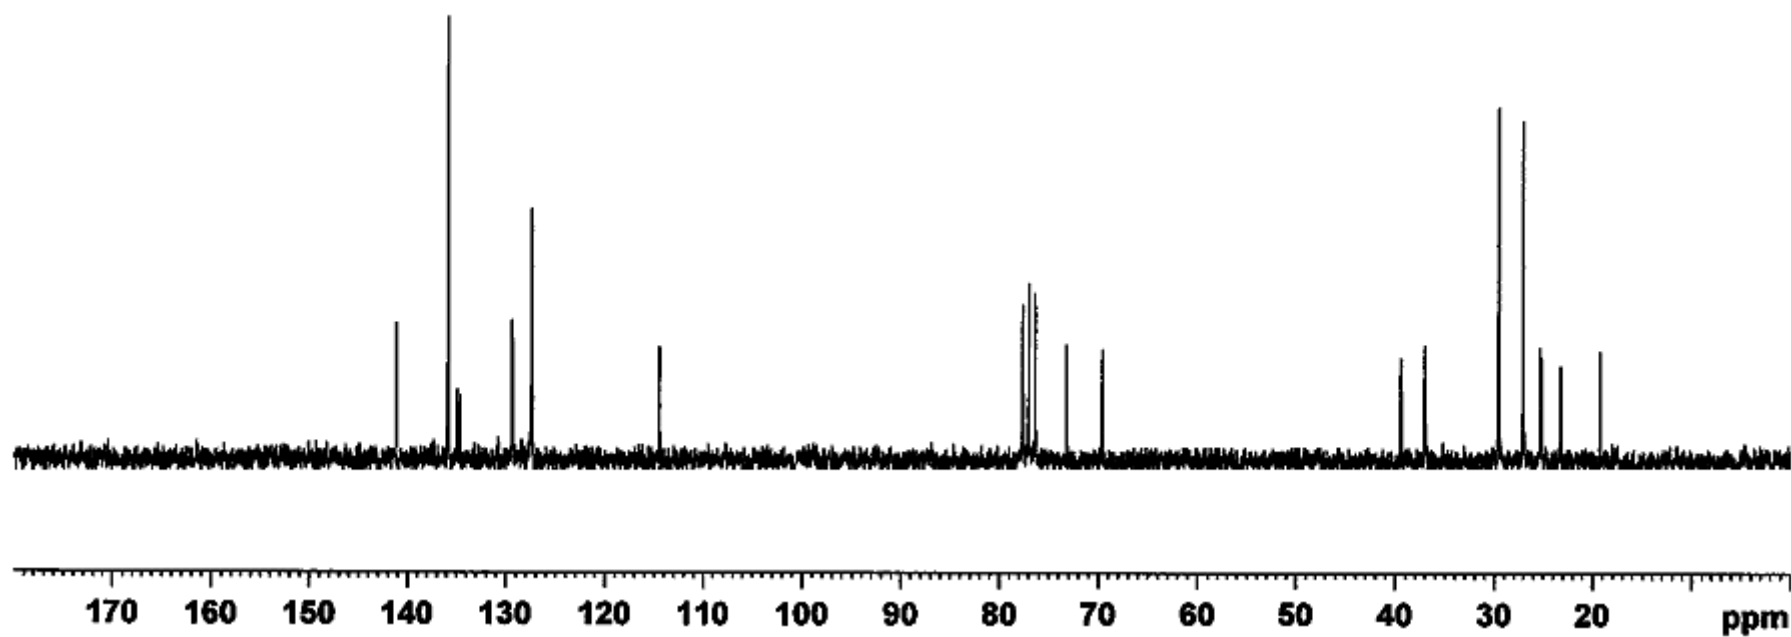

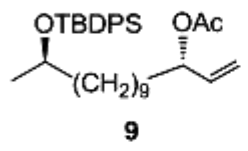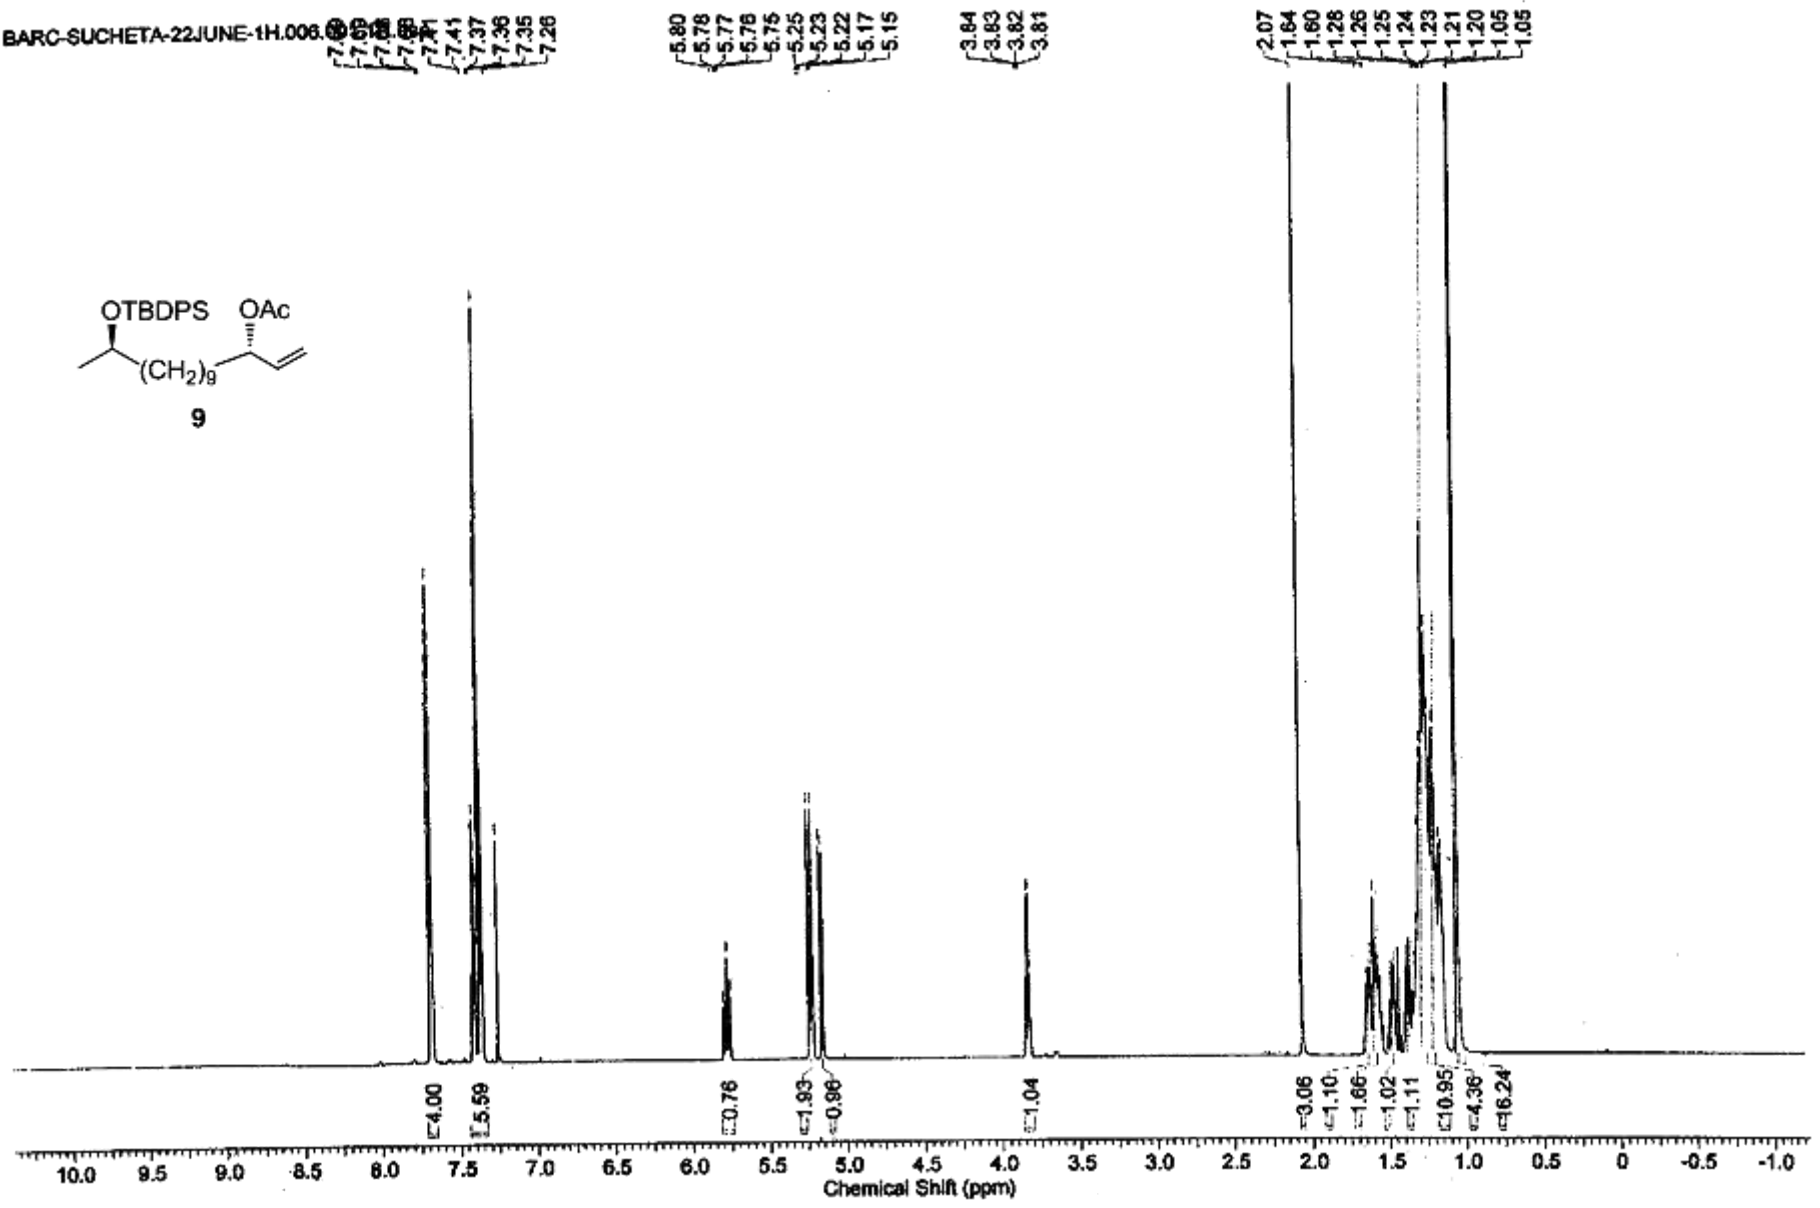

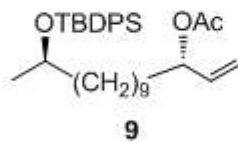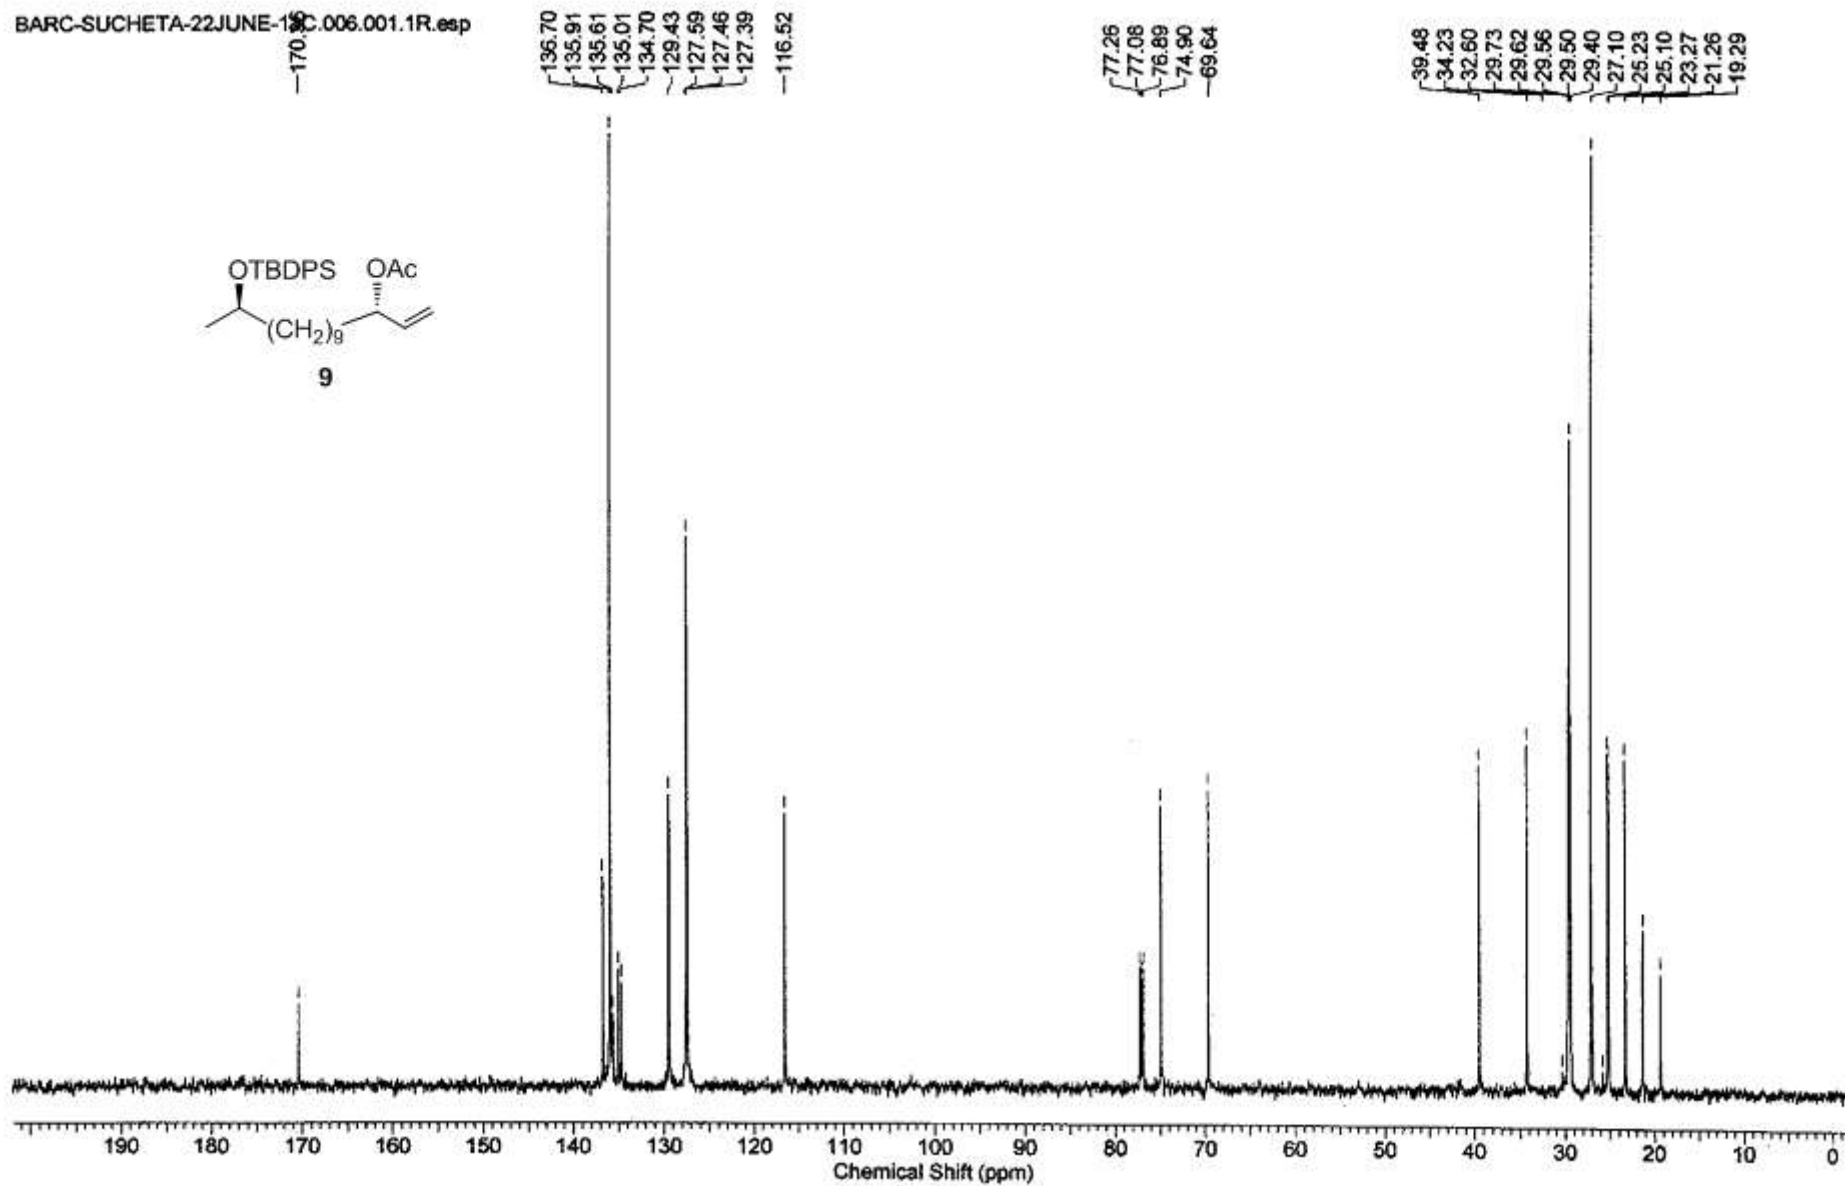

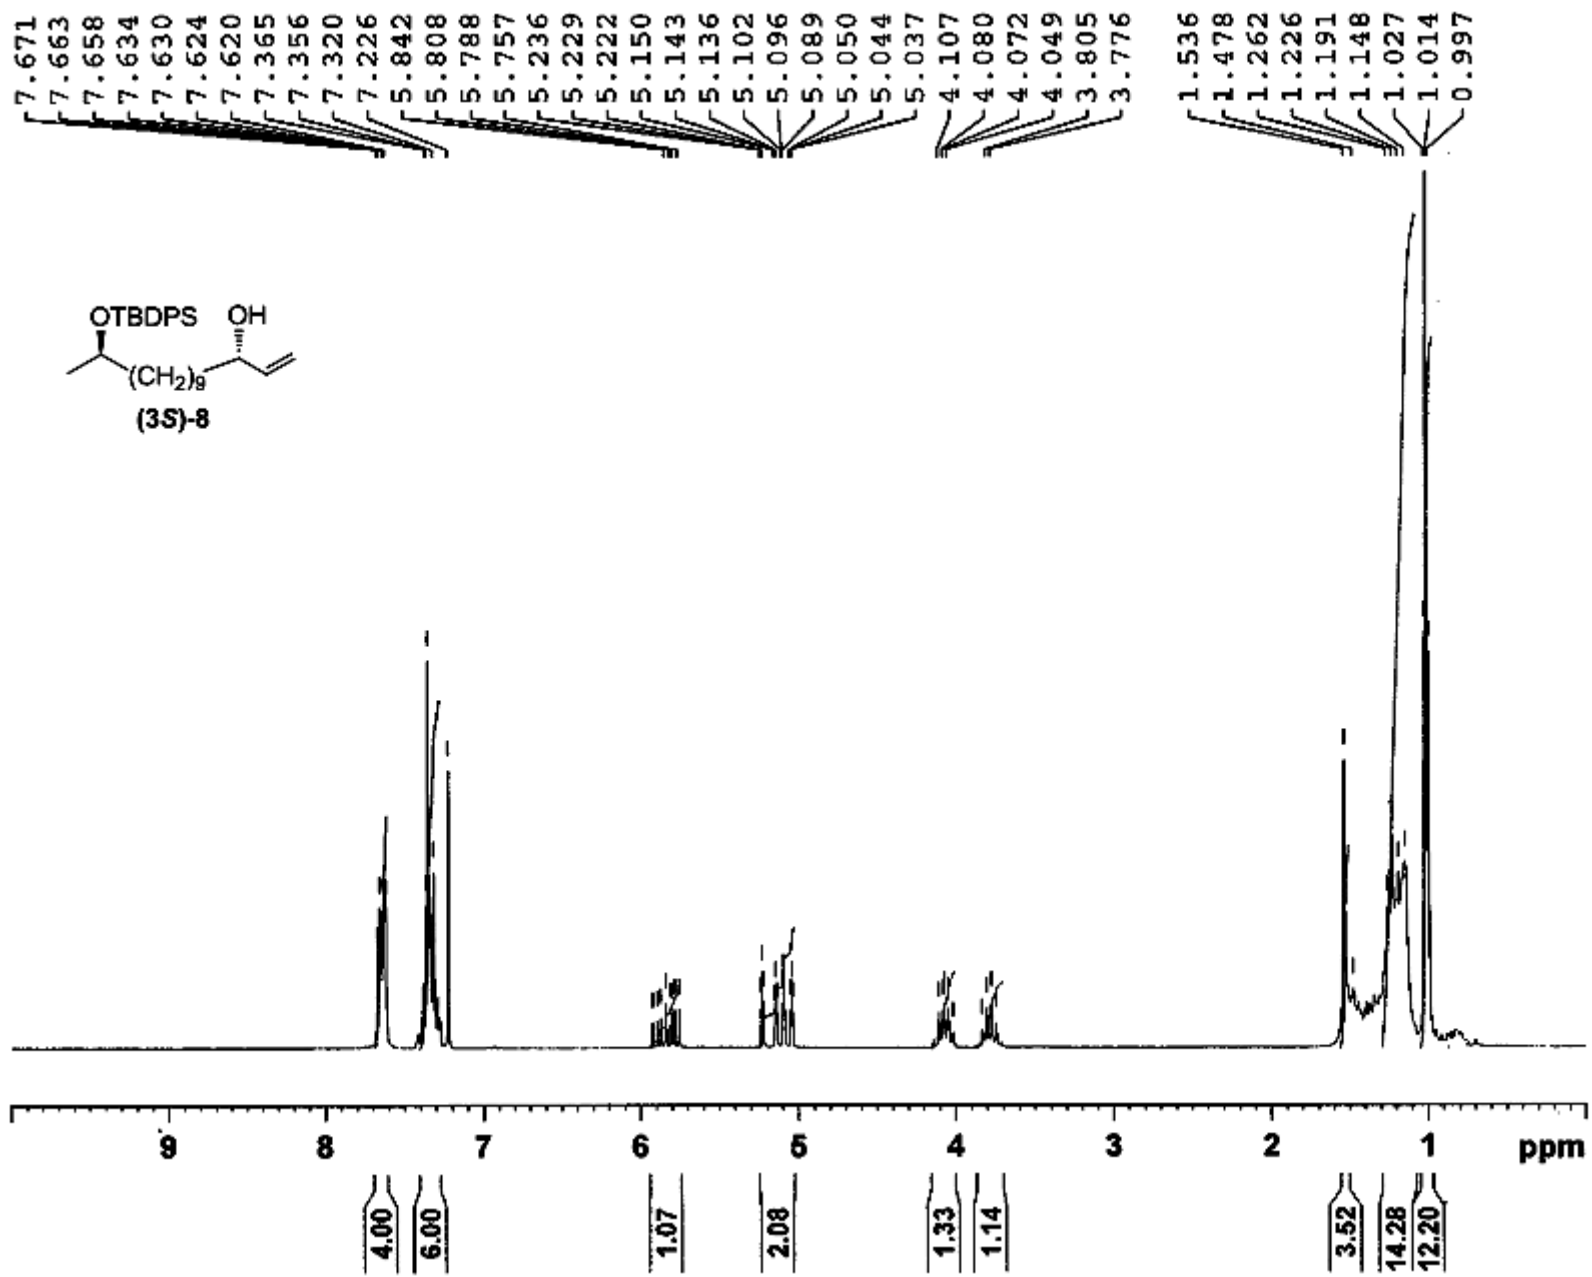

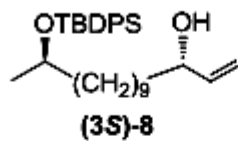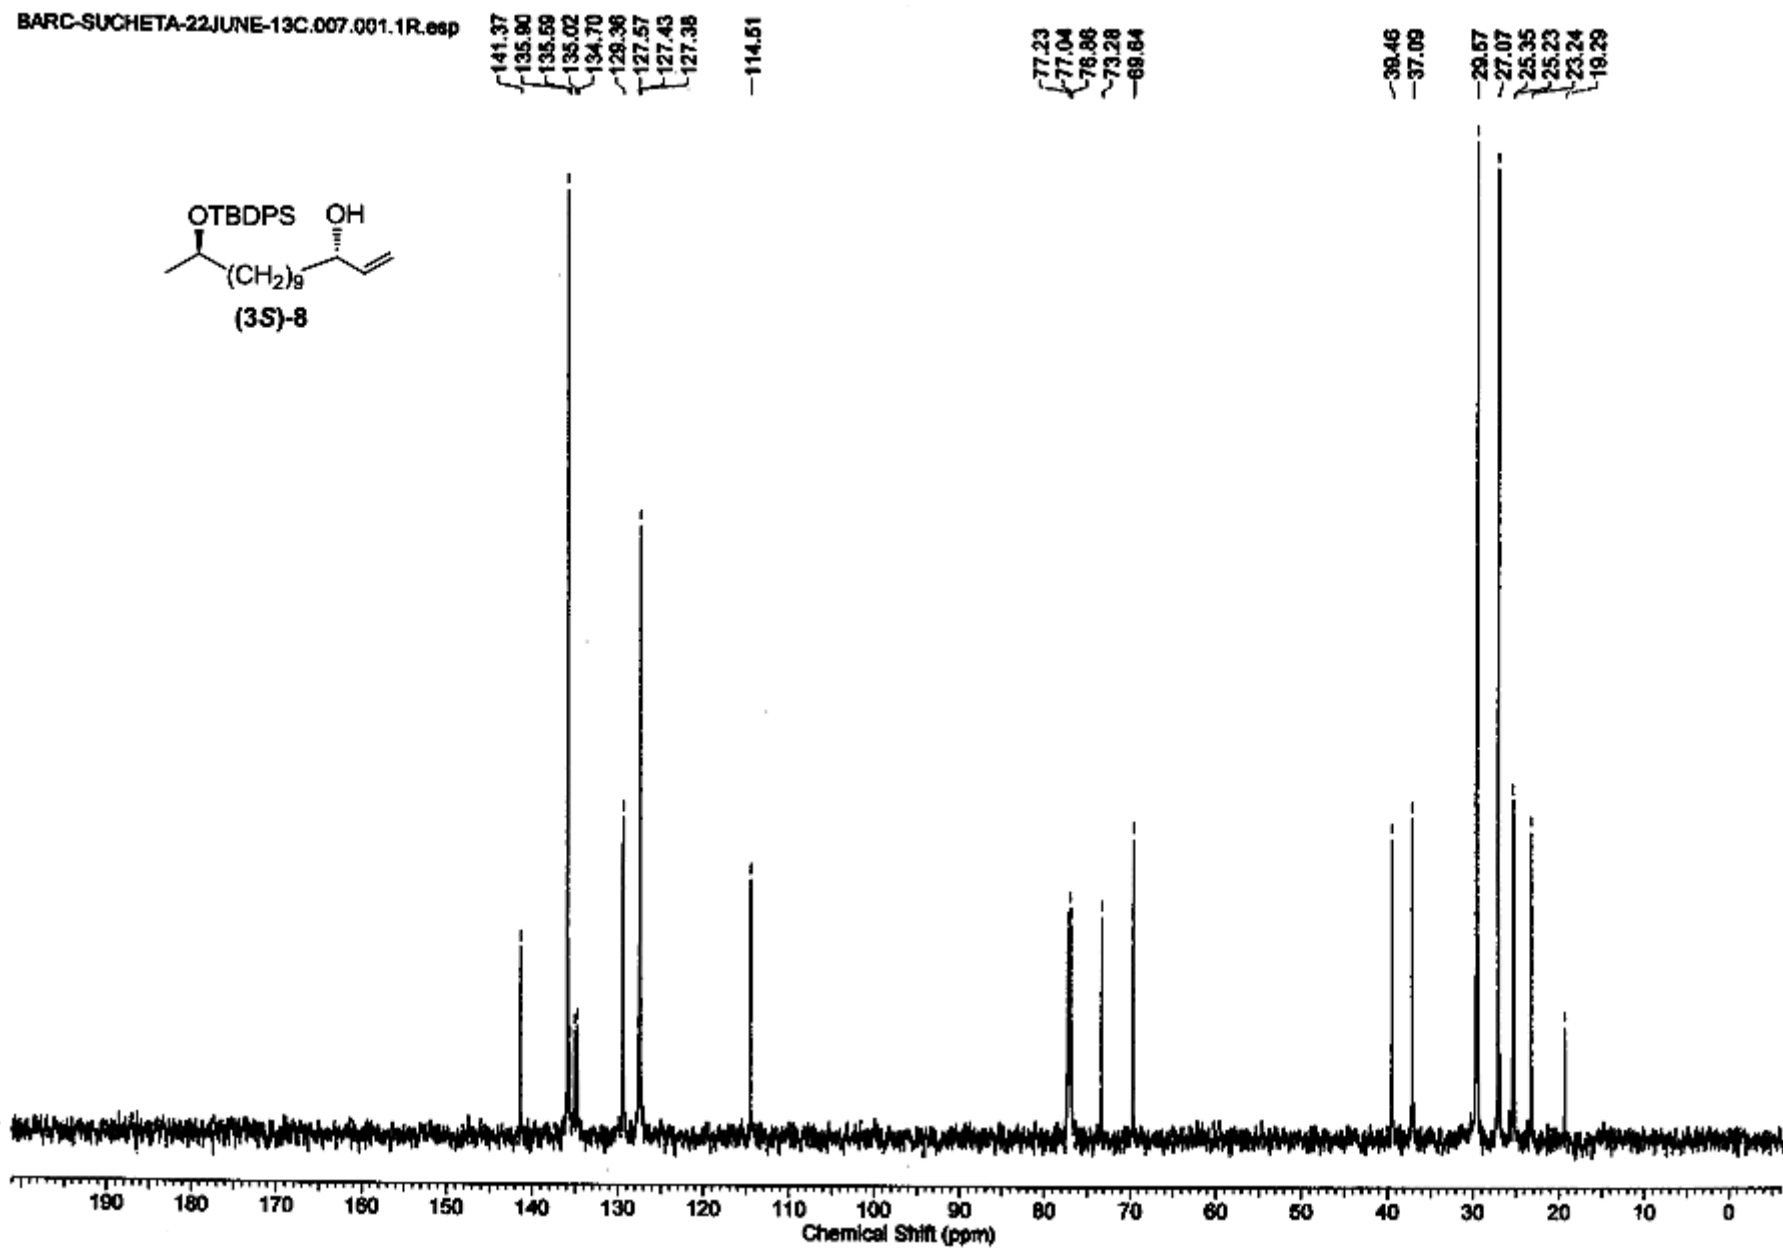



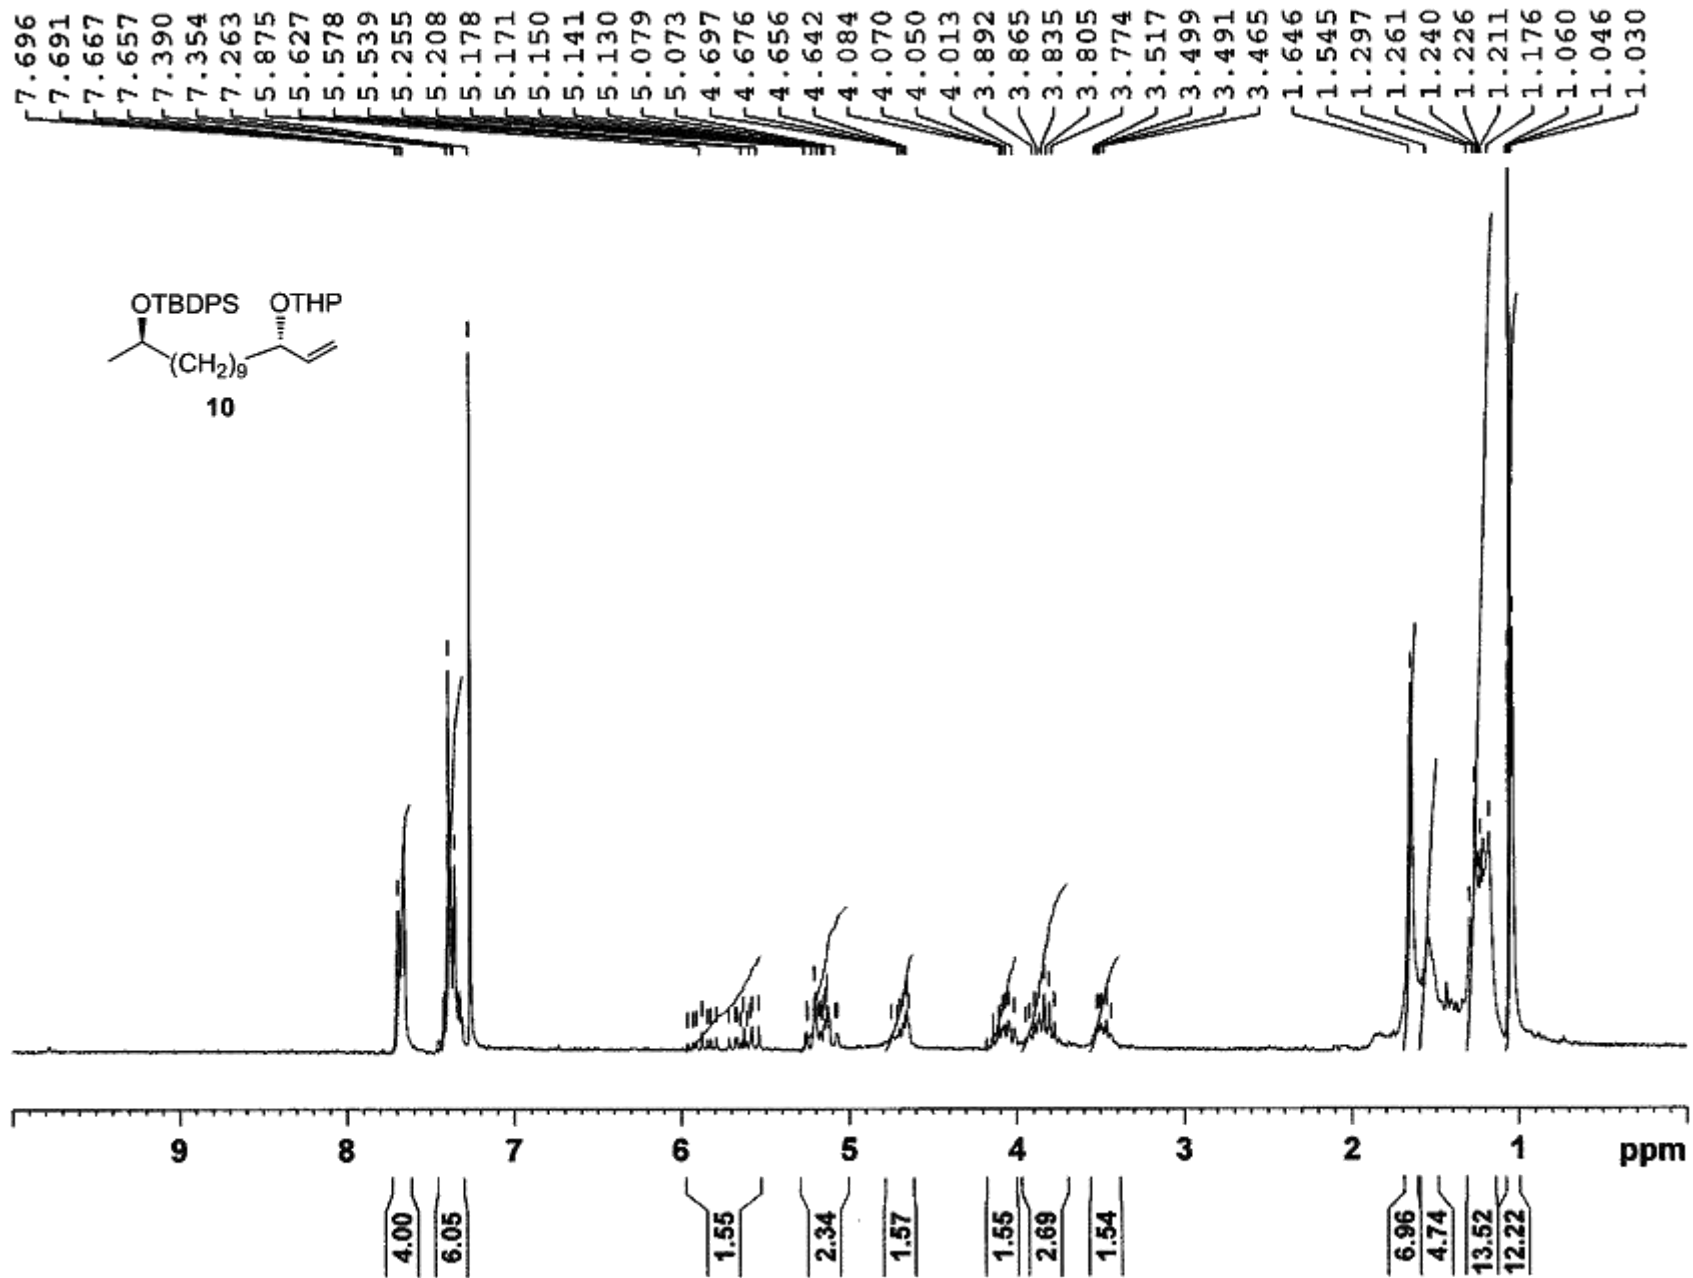

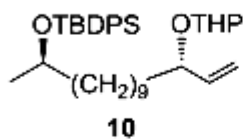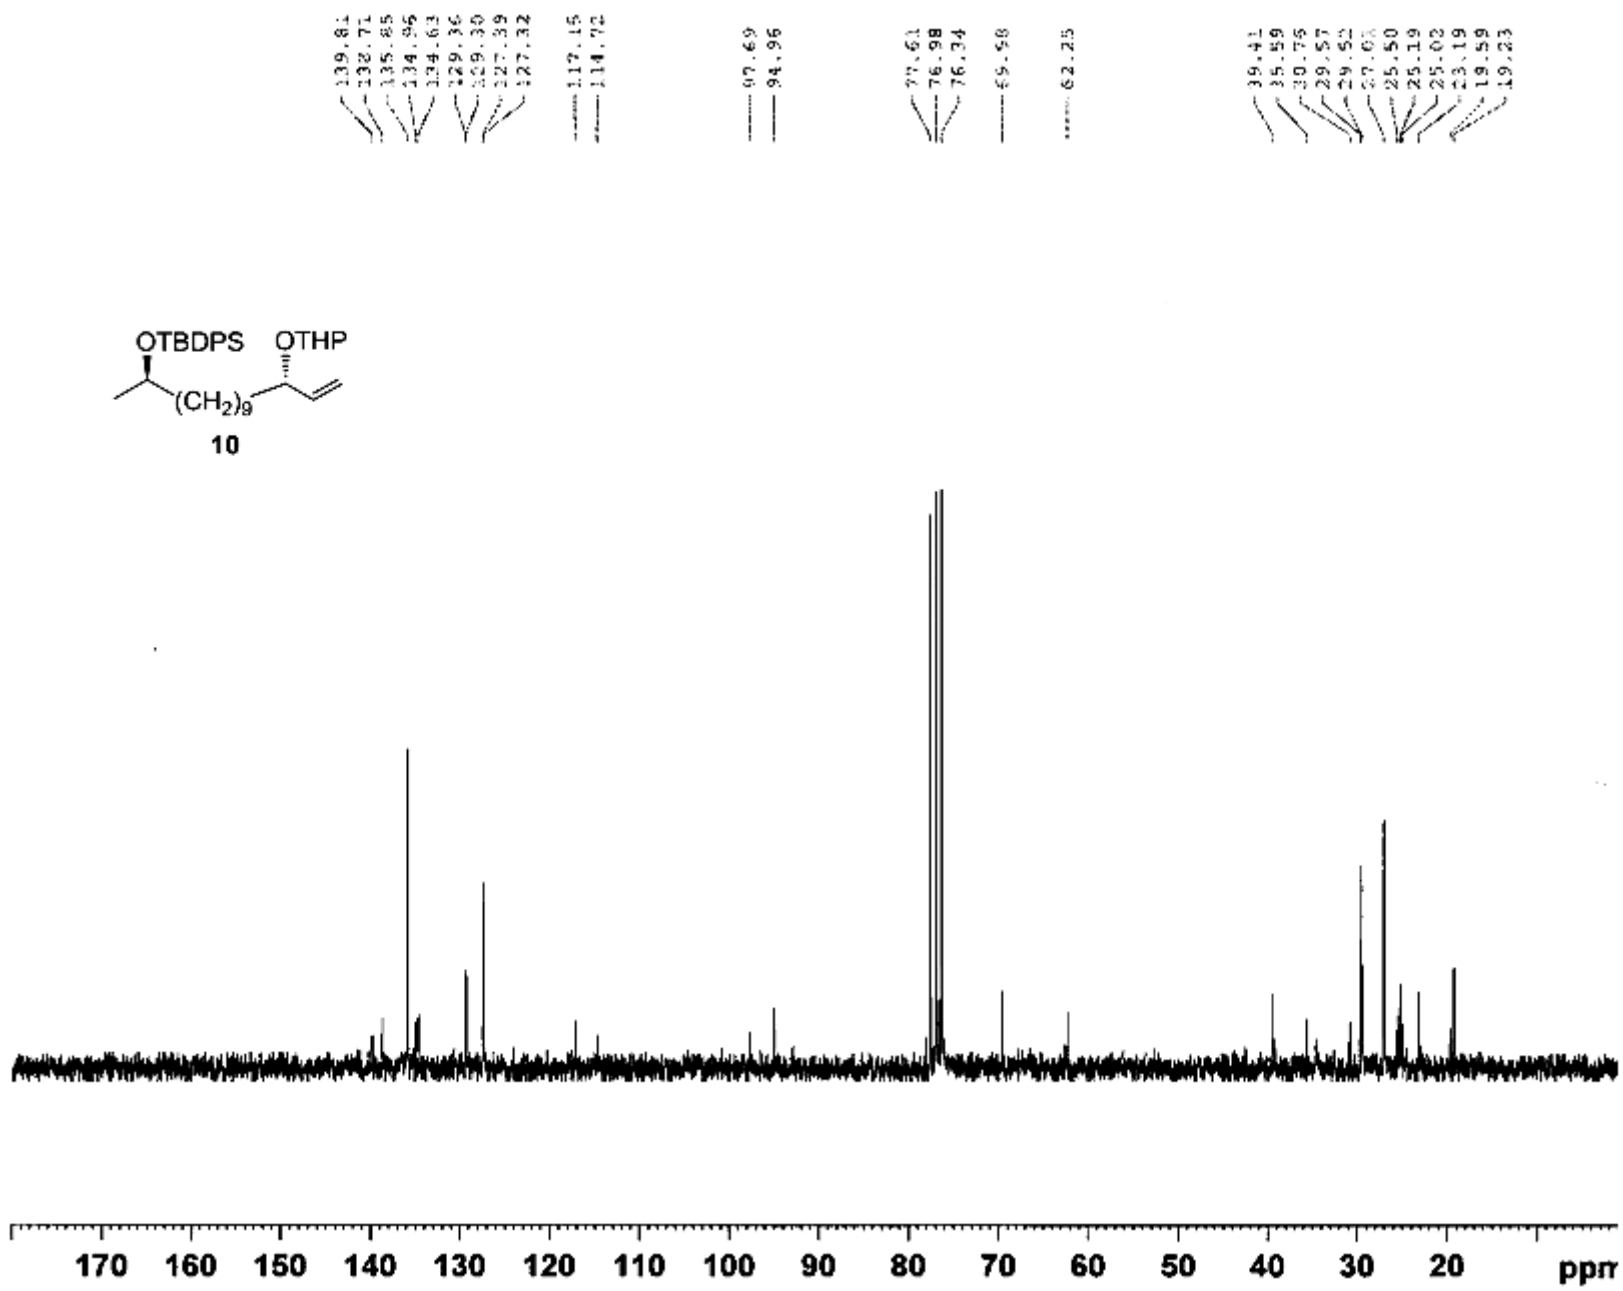



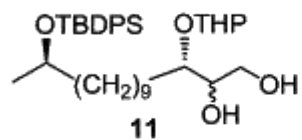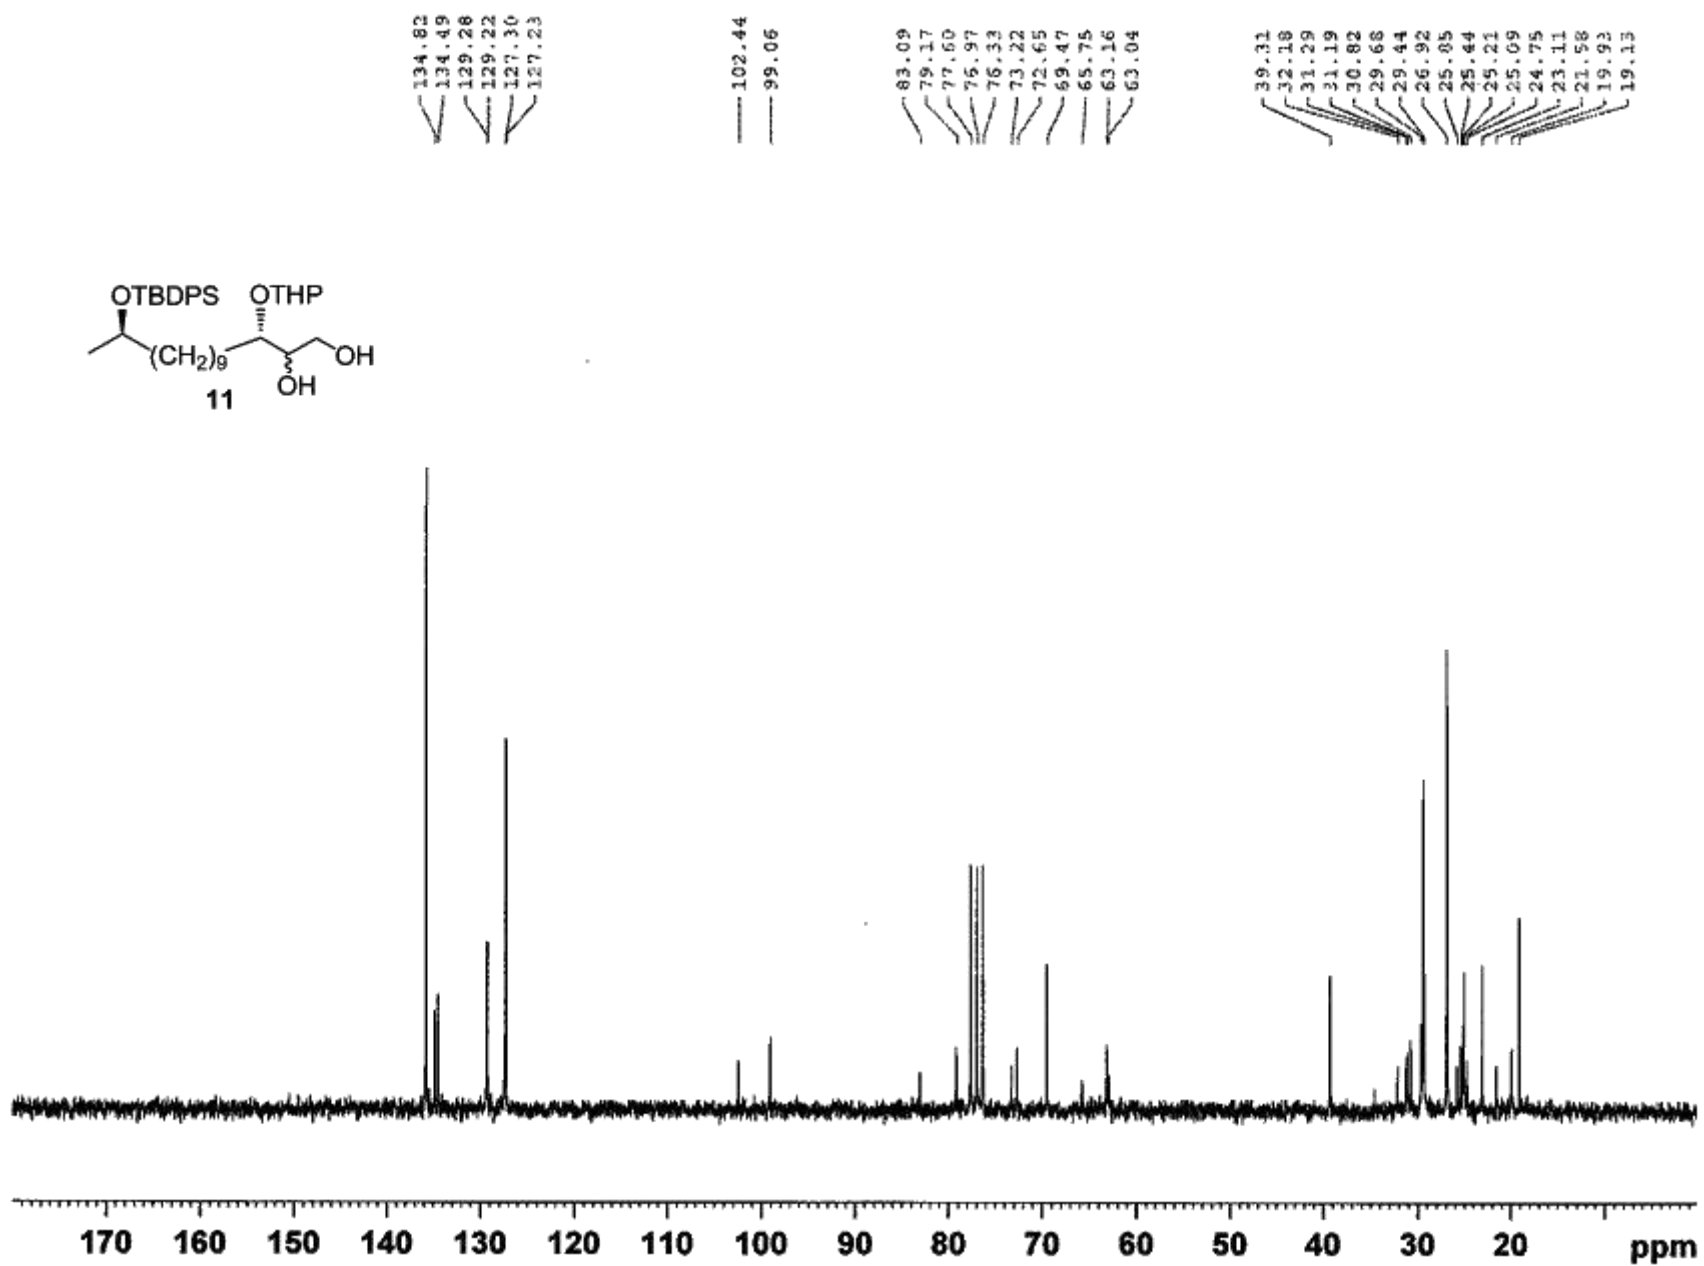

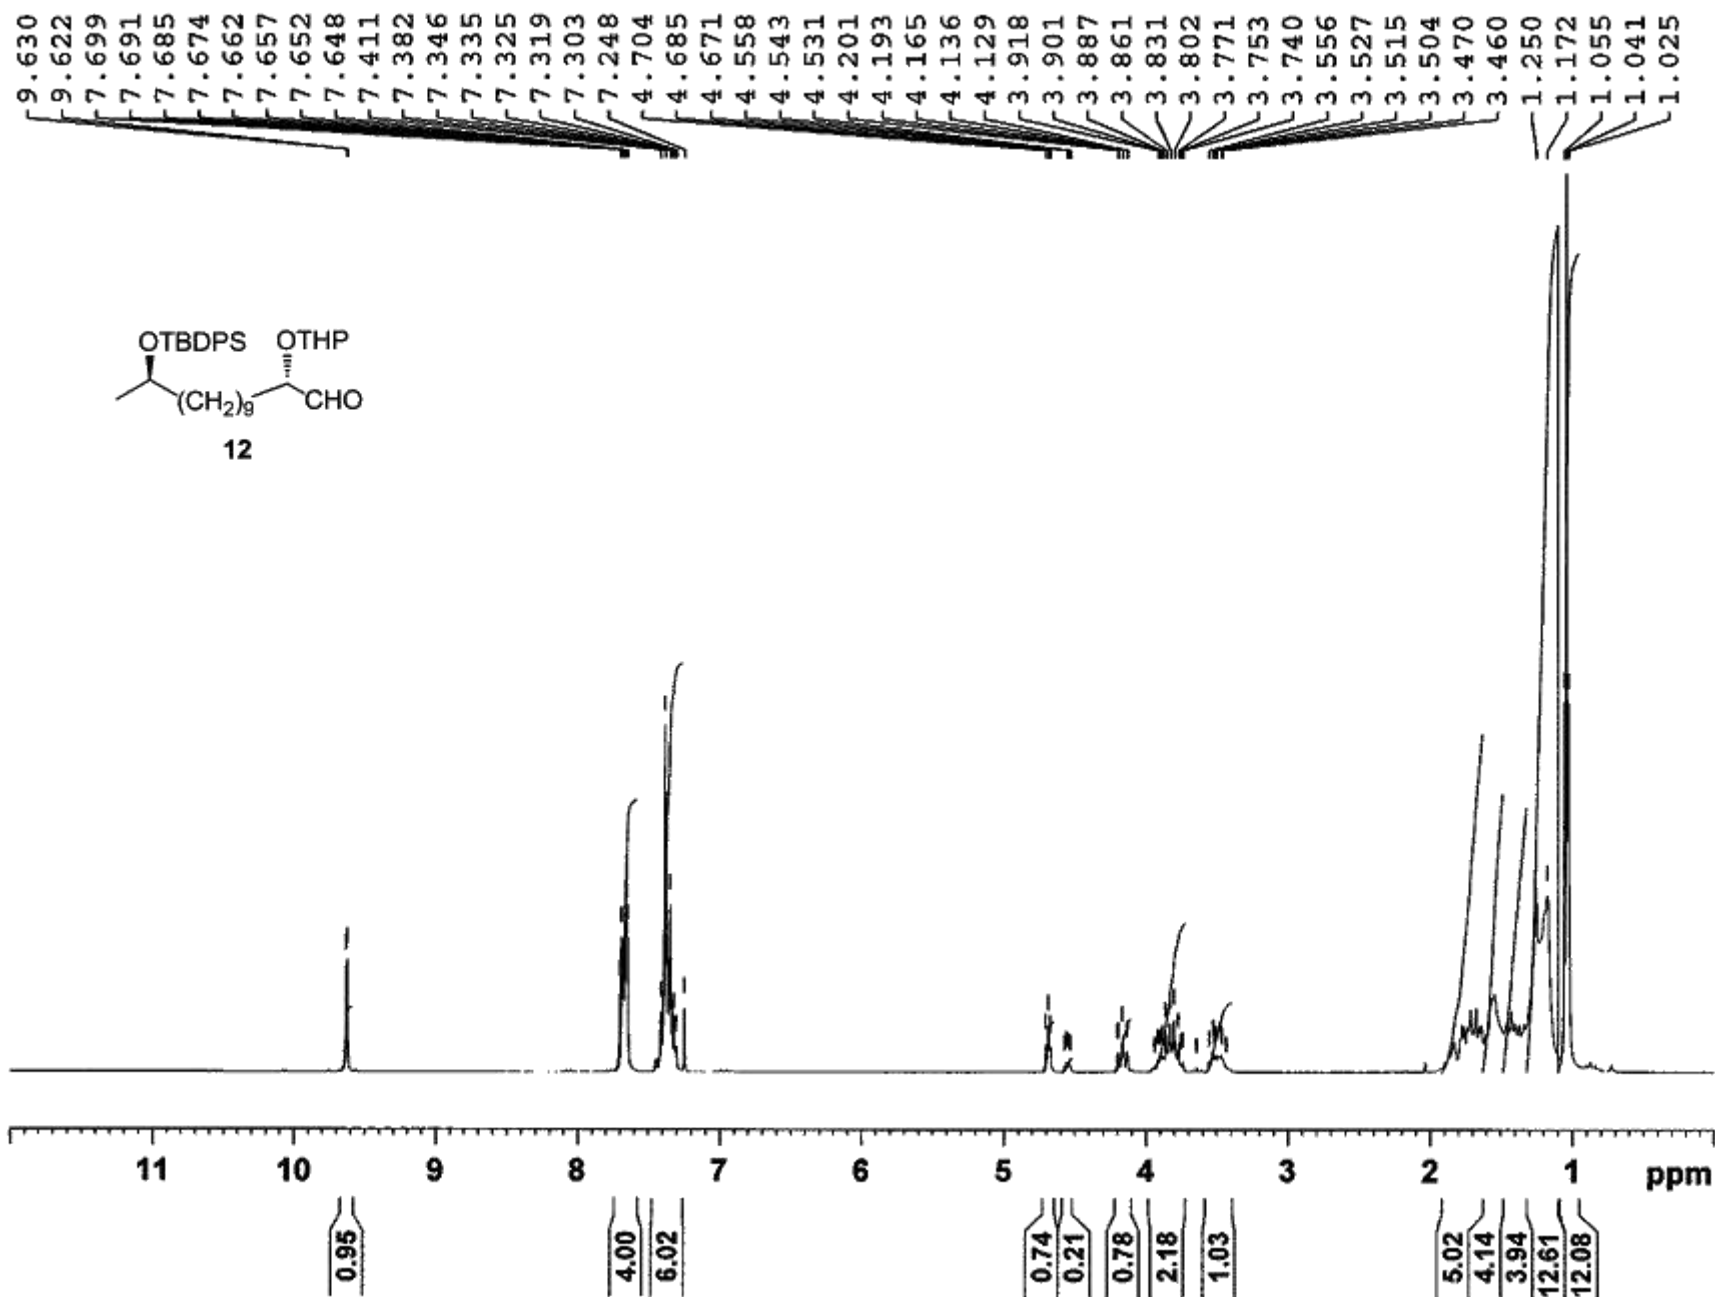

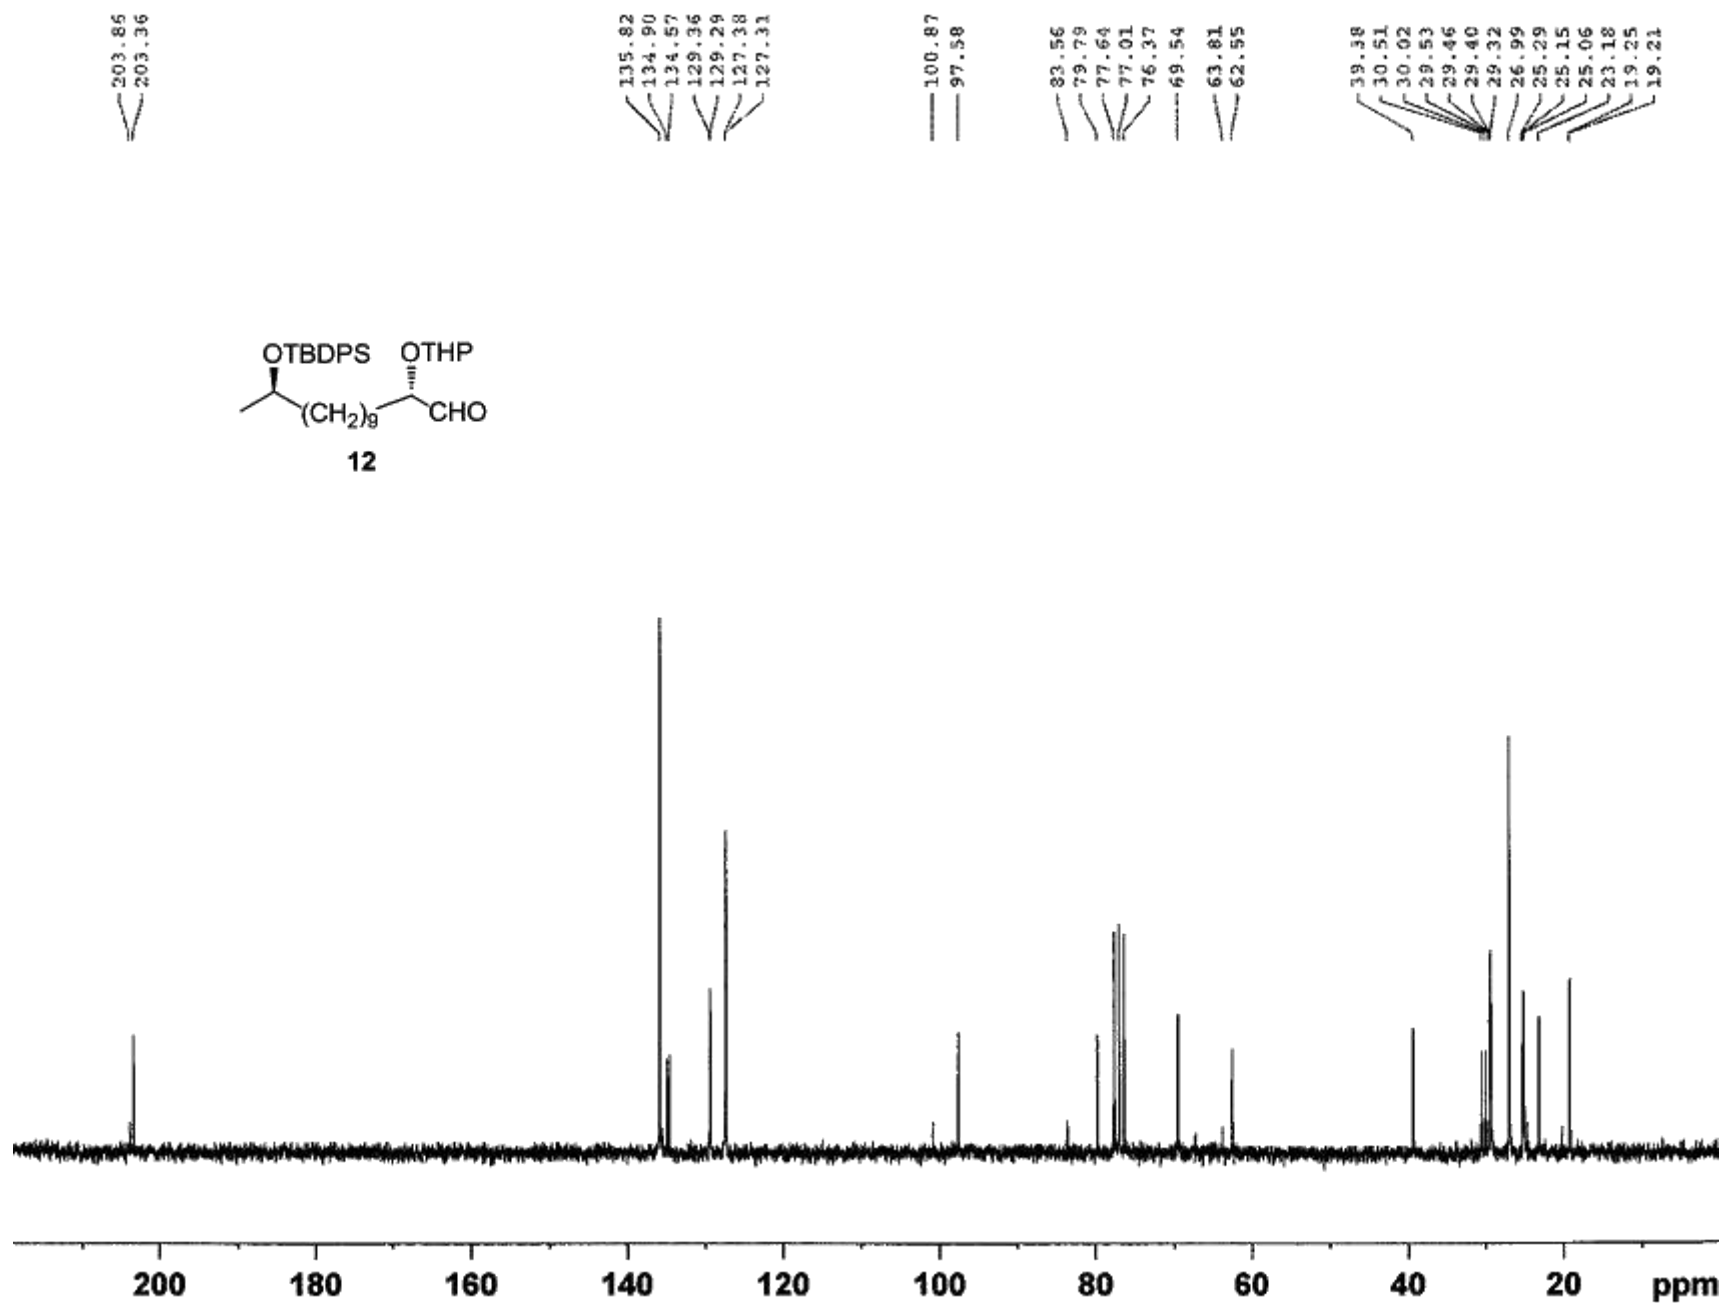

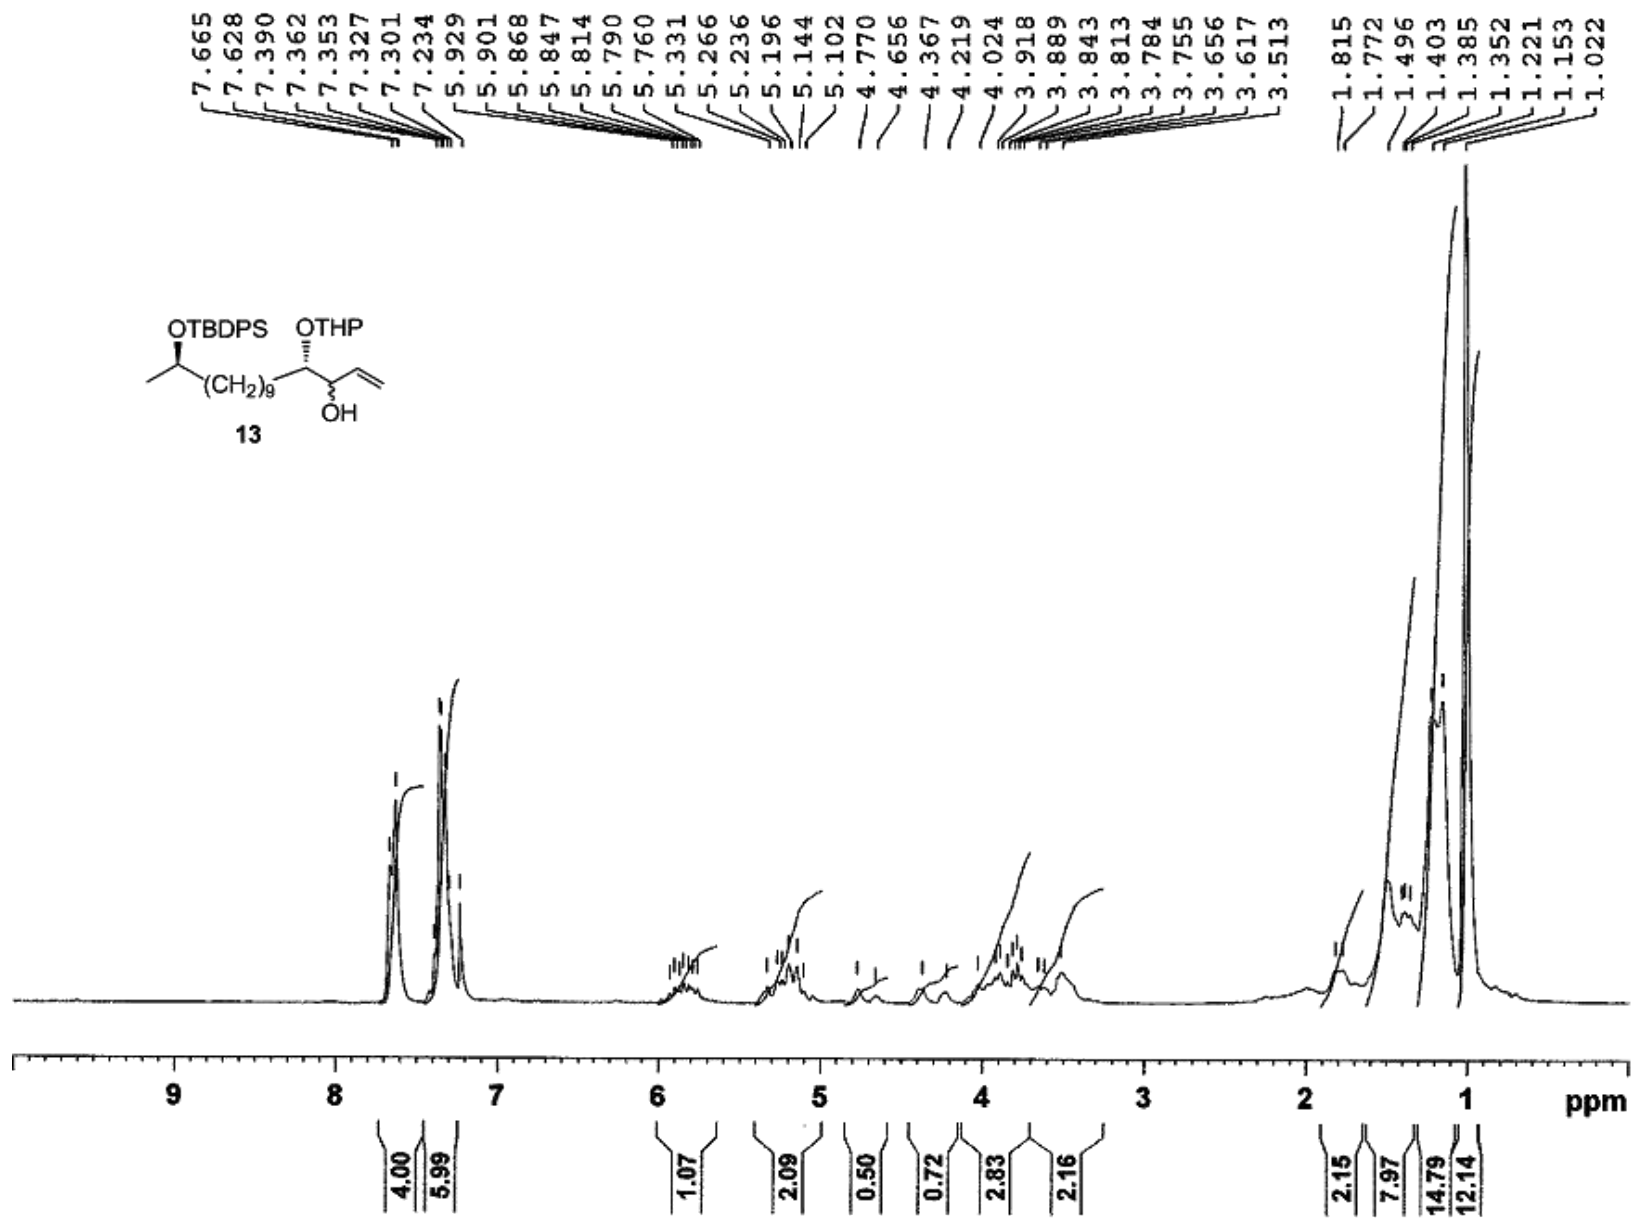







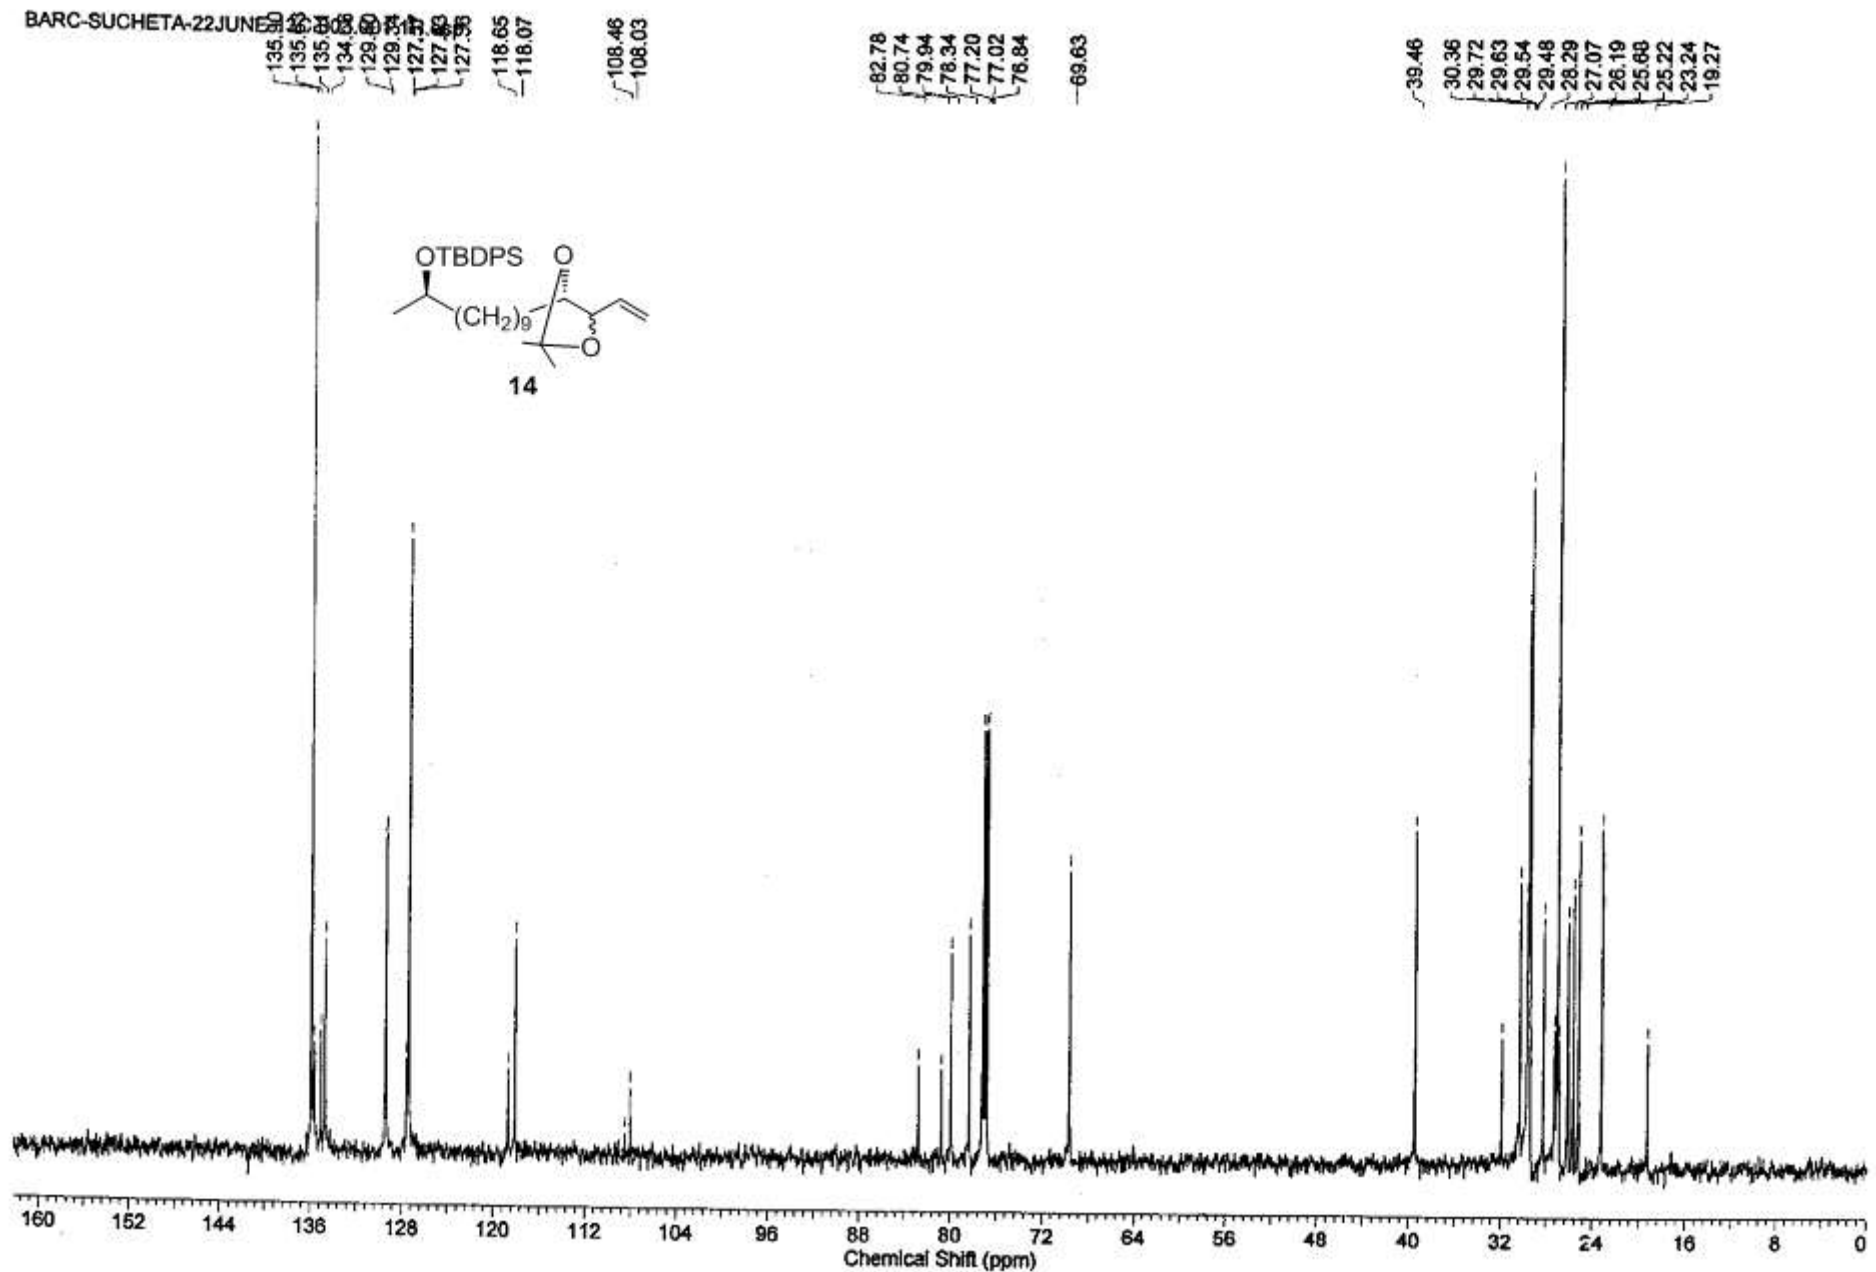

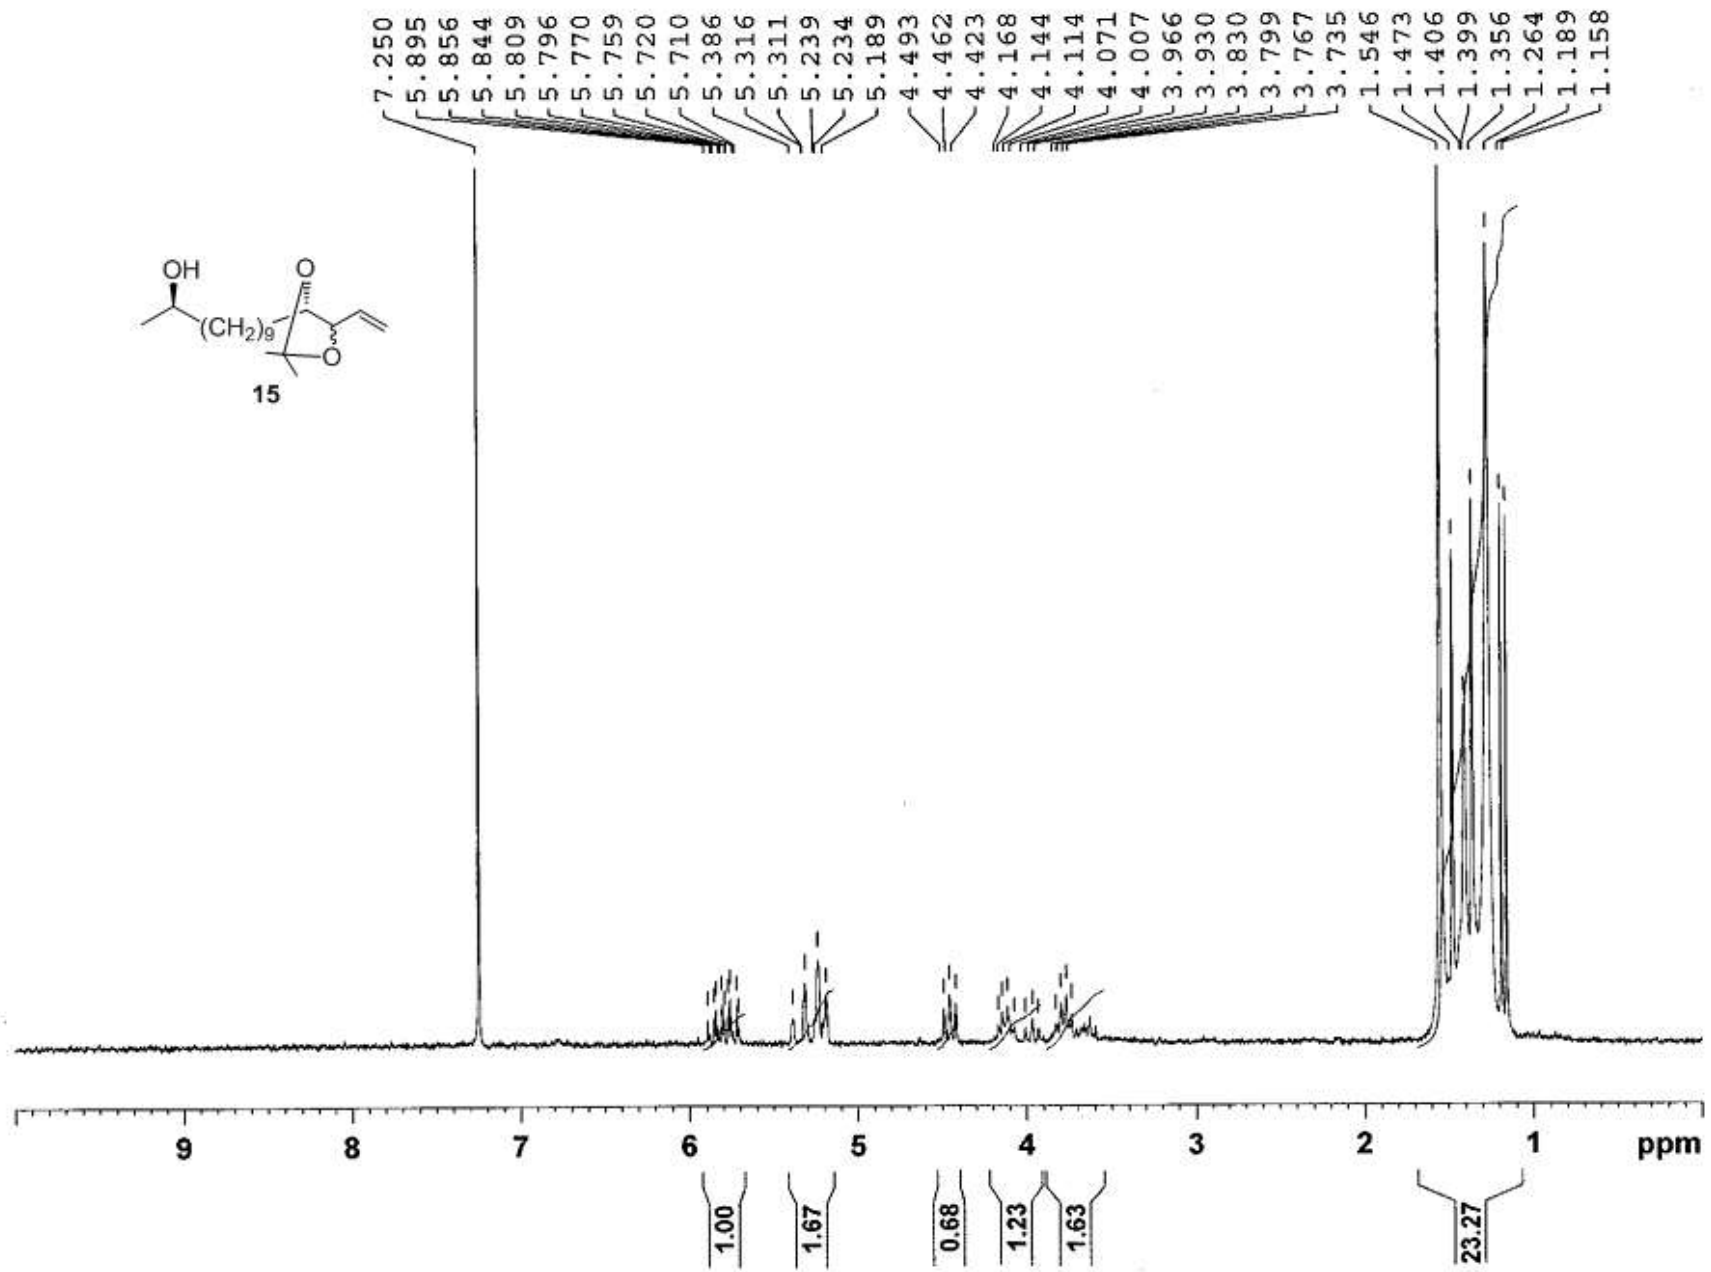

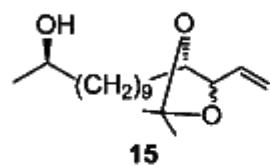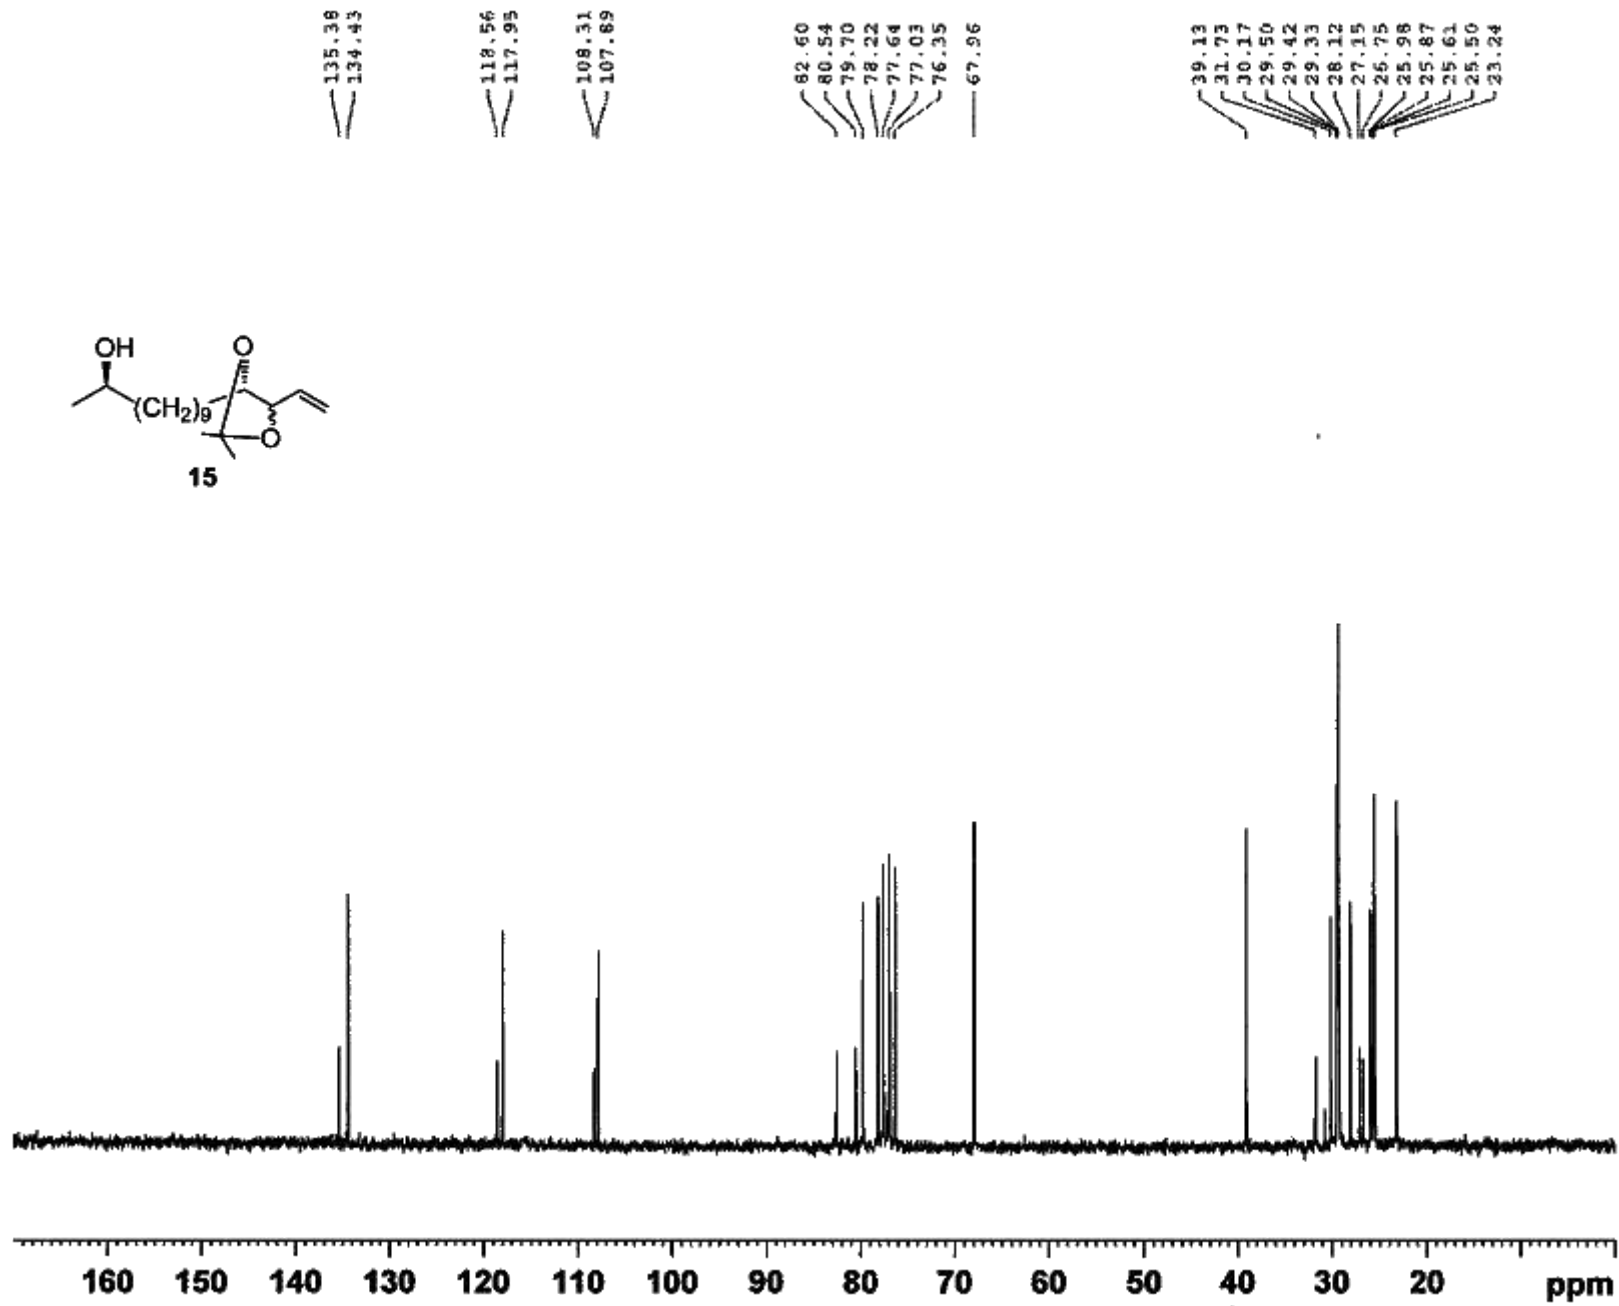

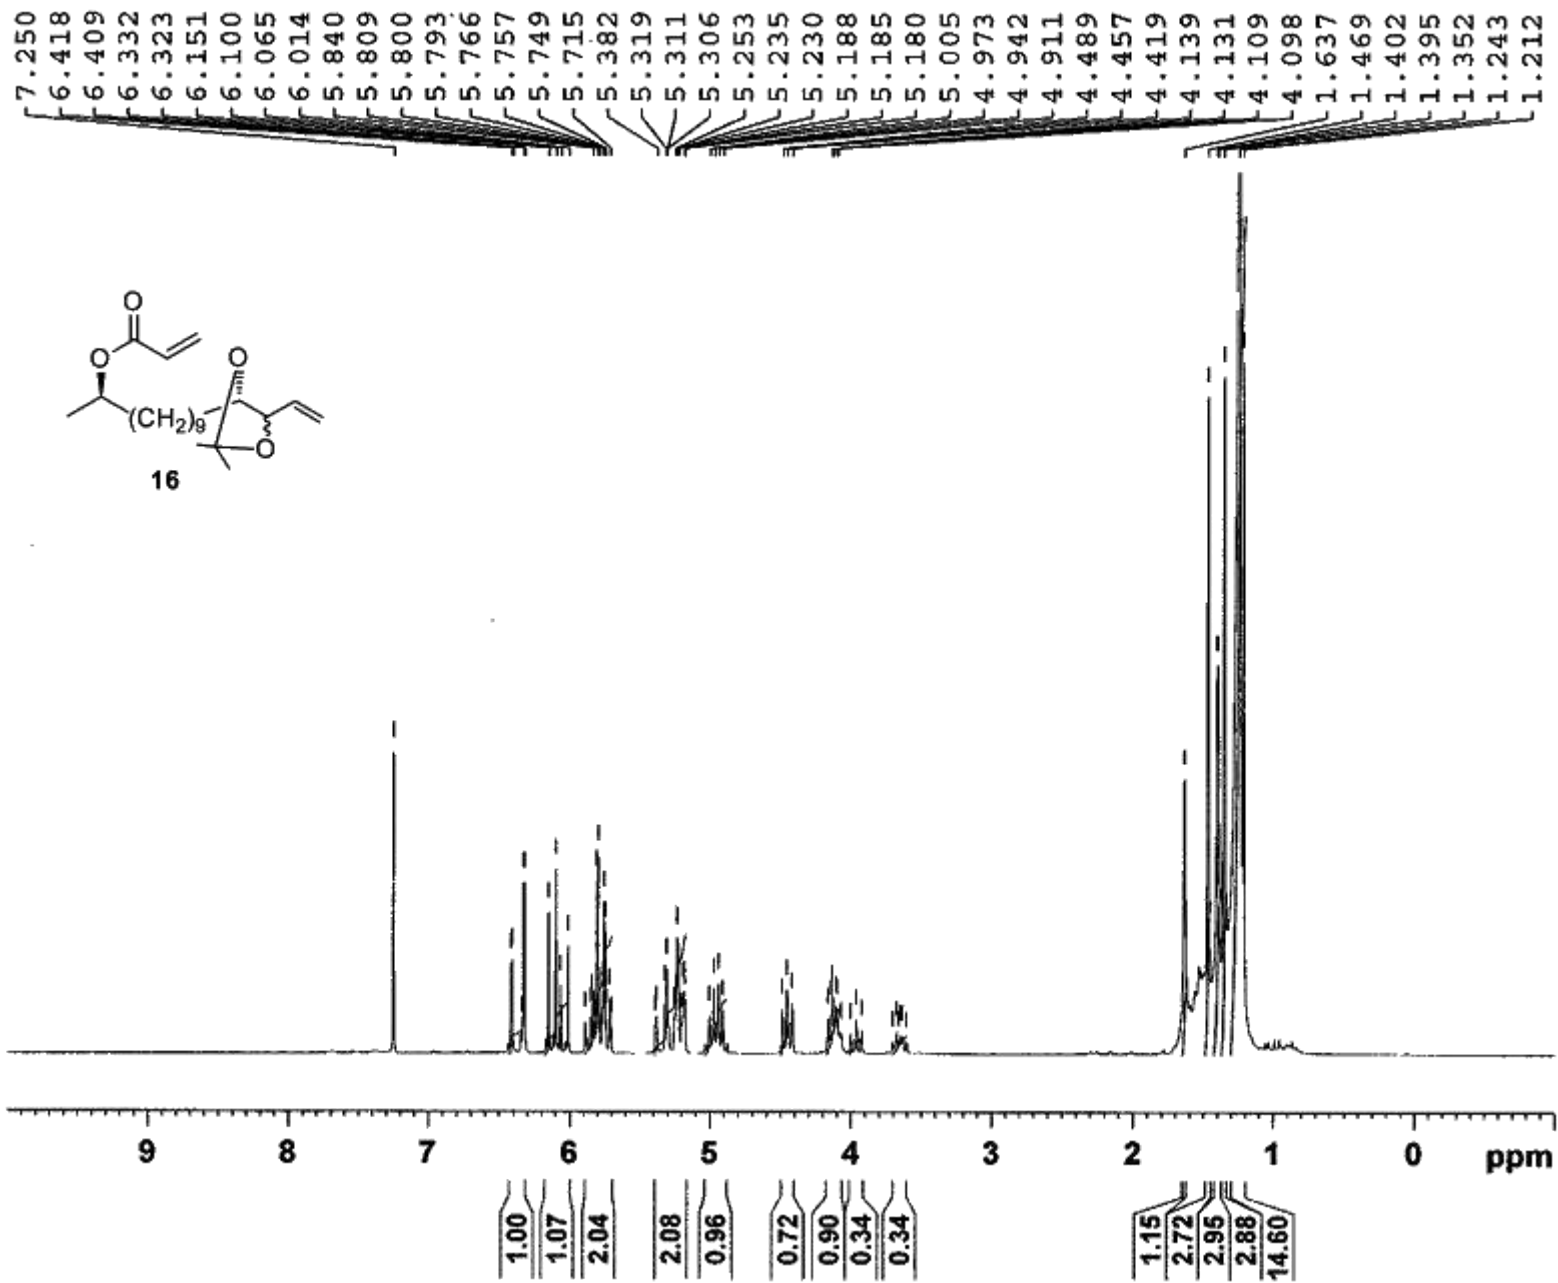

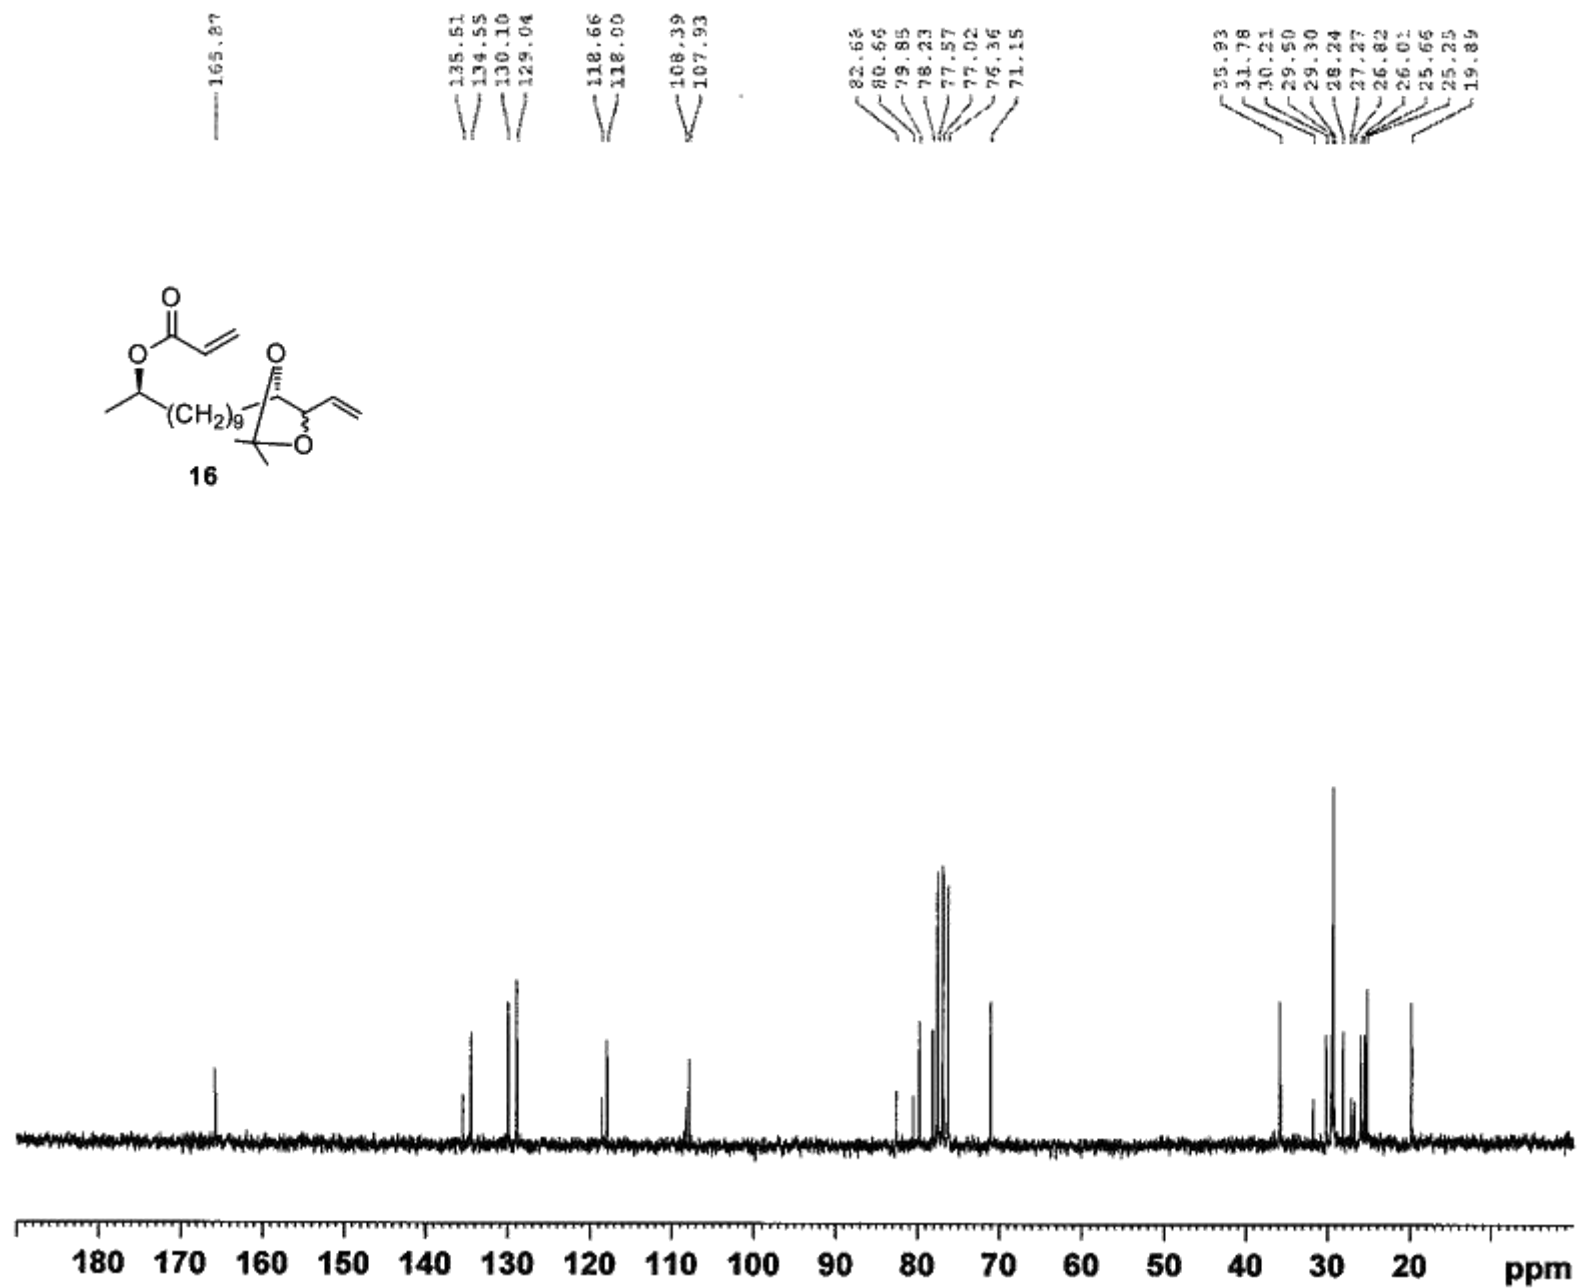

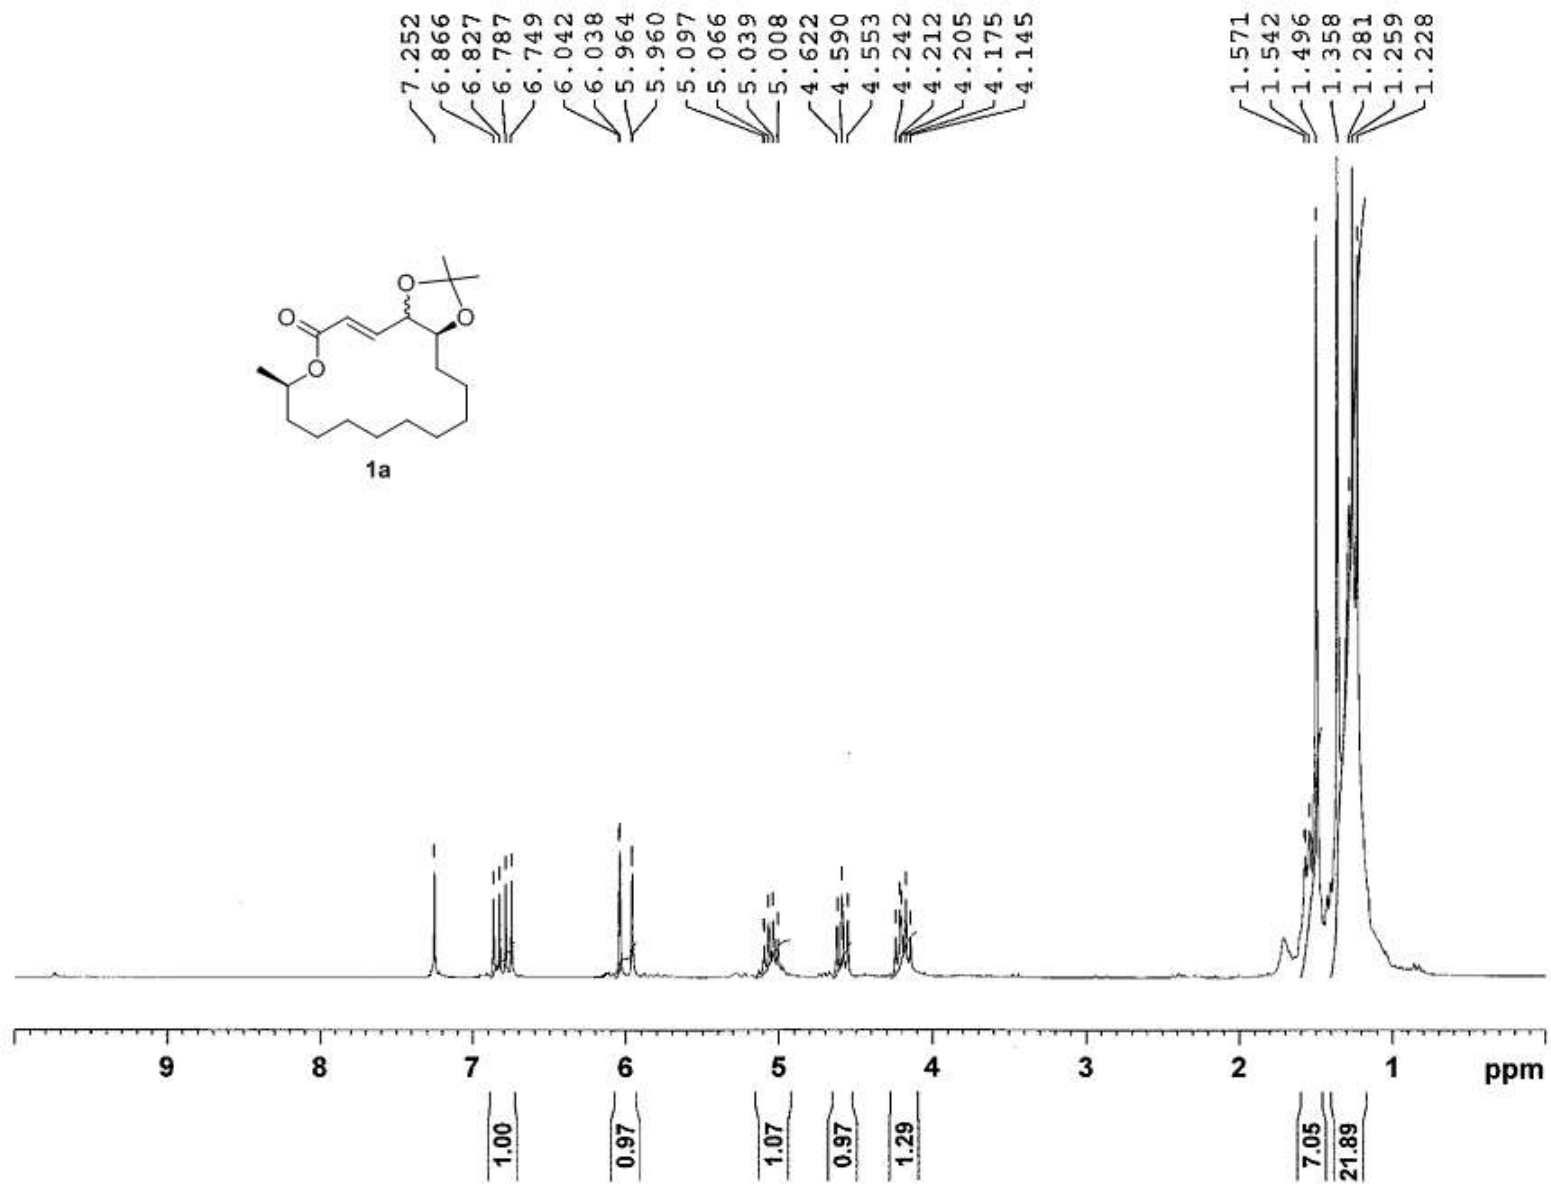

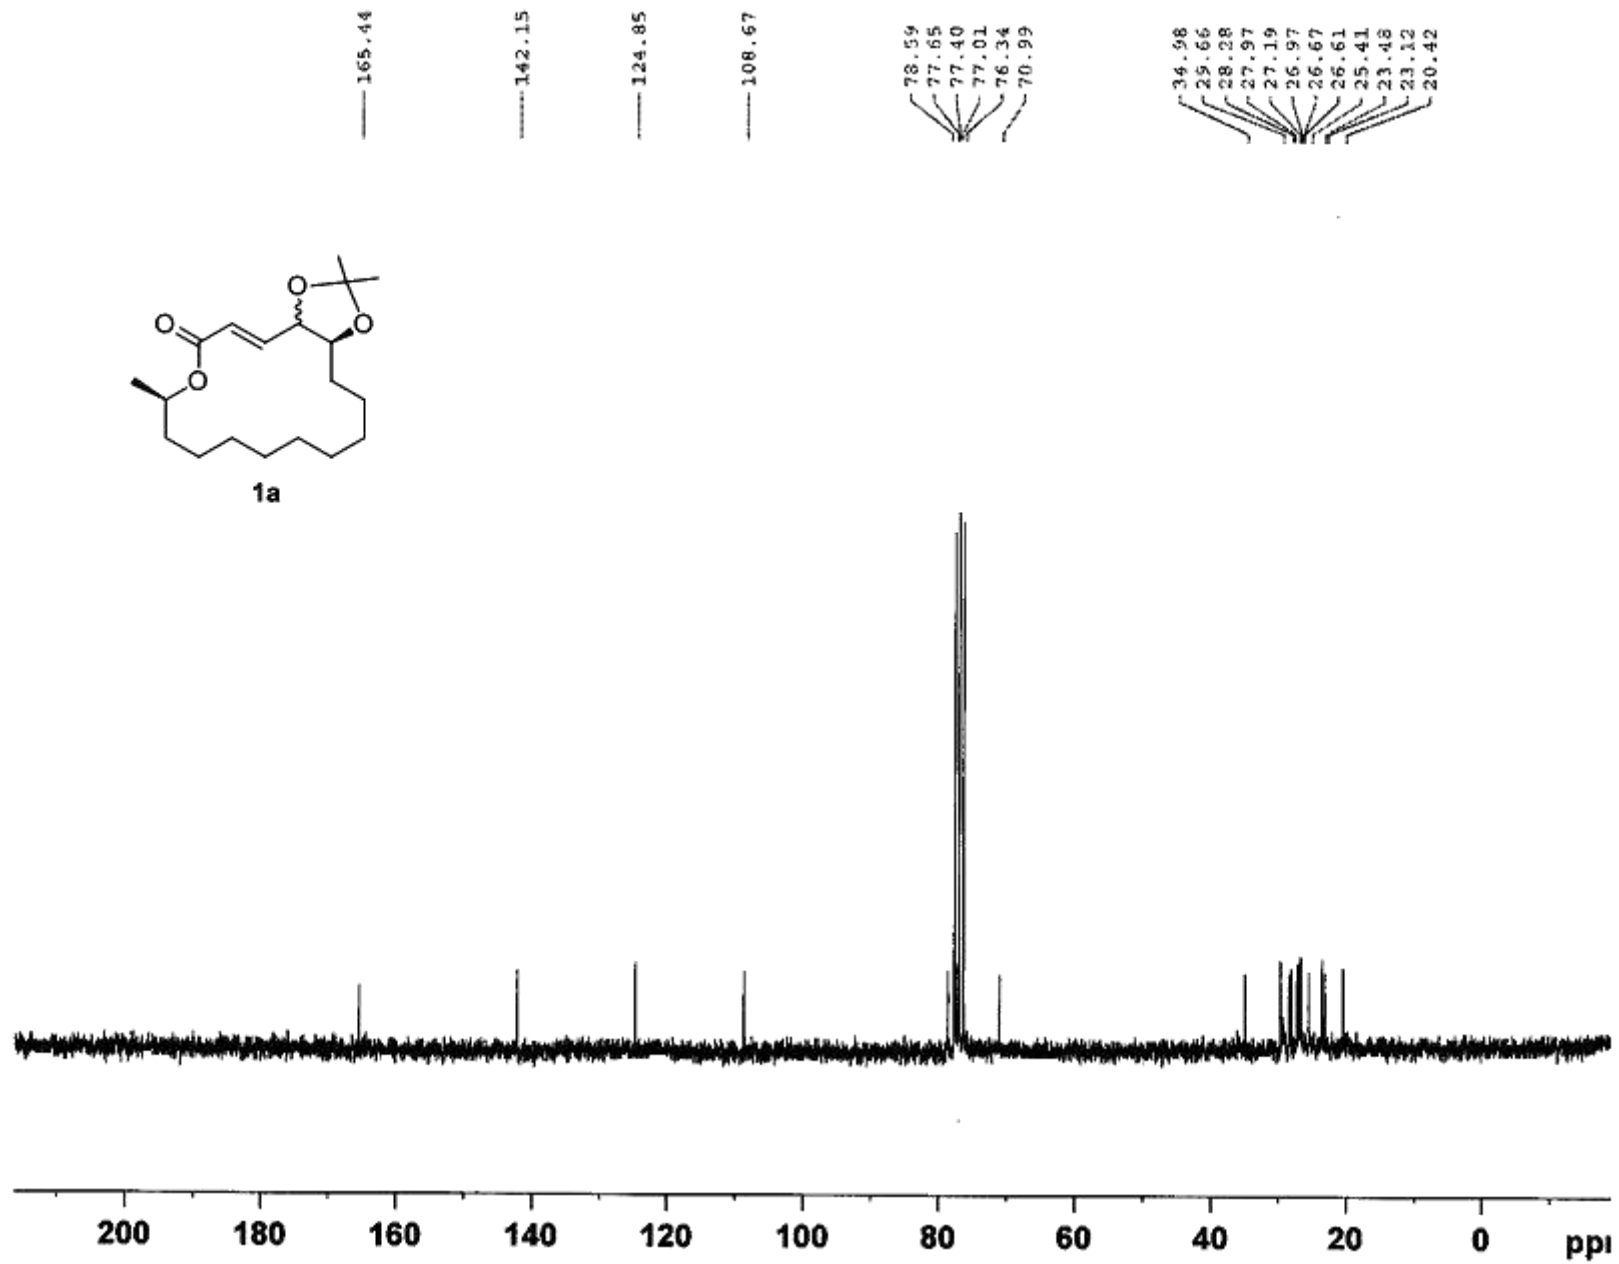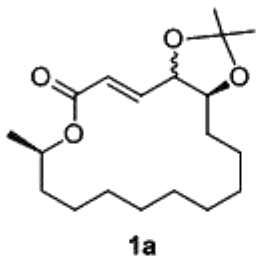



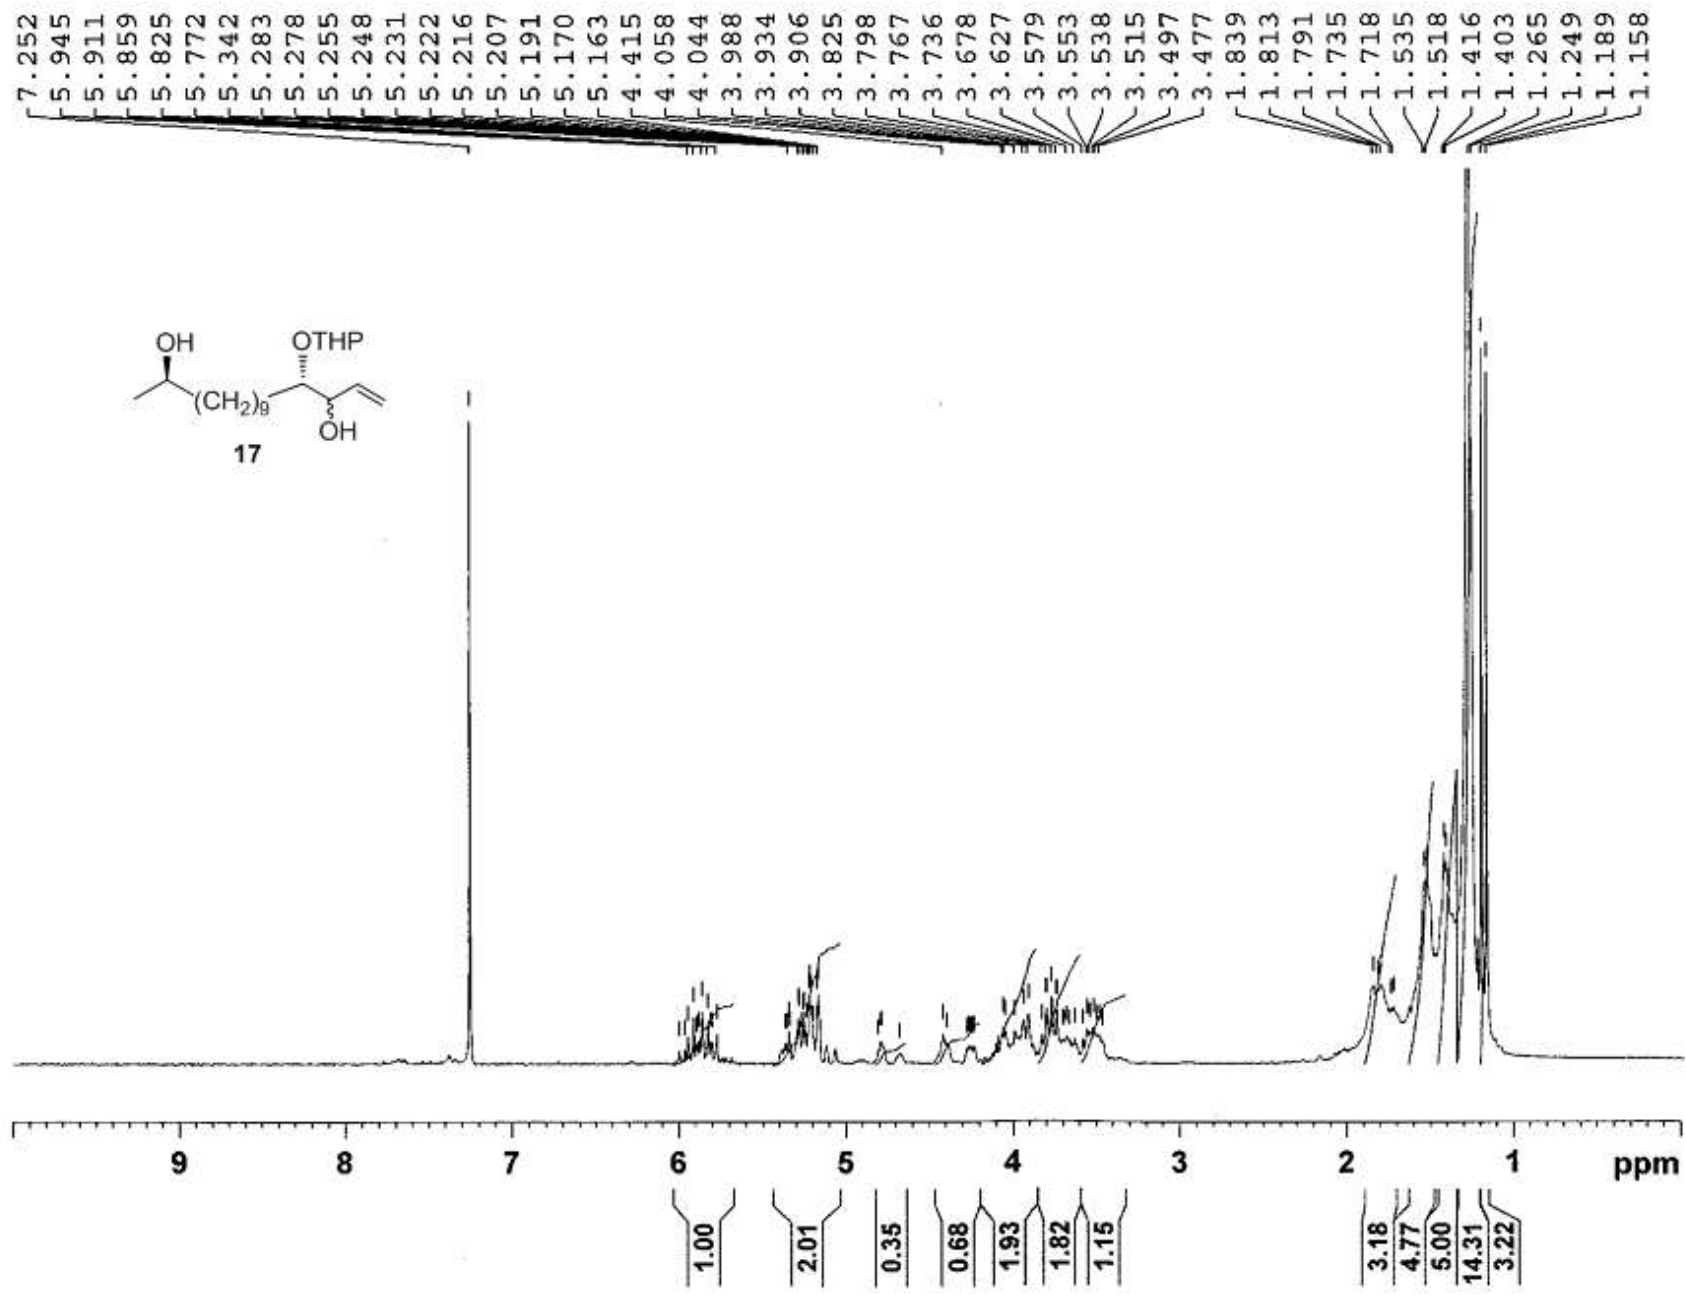

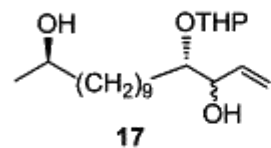

141.30  
 137.84  
 136.81  
 136.45

116.19  
 115.82  
 113.77

101.90  
 97.27

84.93  
 80.33  
 79.09  
 77.64  
 77.00  
 76.37  
 75.17  
 74.50  
 73.39  
 72.56  
 67.42  
 64.78  
 62.48

38.98  
 36.76  
 31.55  
 30.99  
 30.53  
 29.58  
 29.35  
 29.25  
 29.18  
 25.63  
 25.46  
 25.11  
 24.67  
 23.06  
 20.89  
 19.68  
 19.46

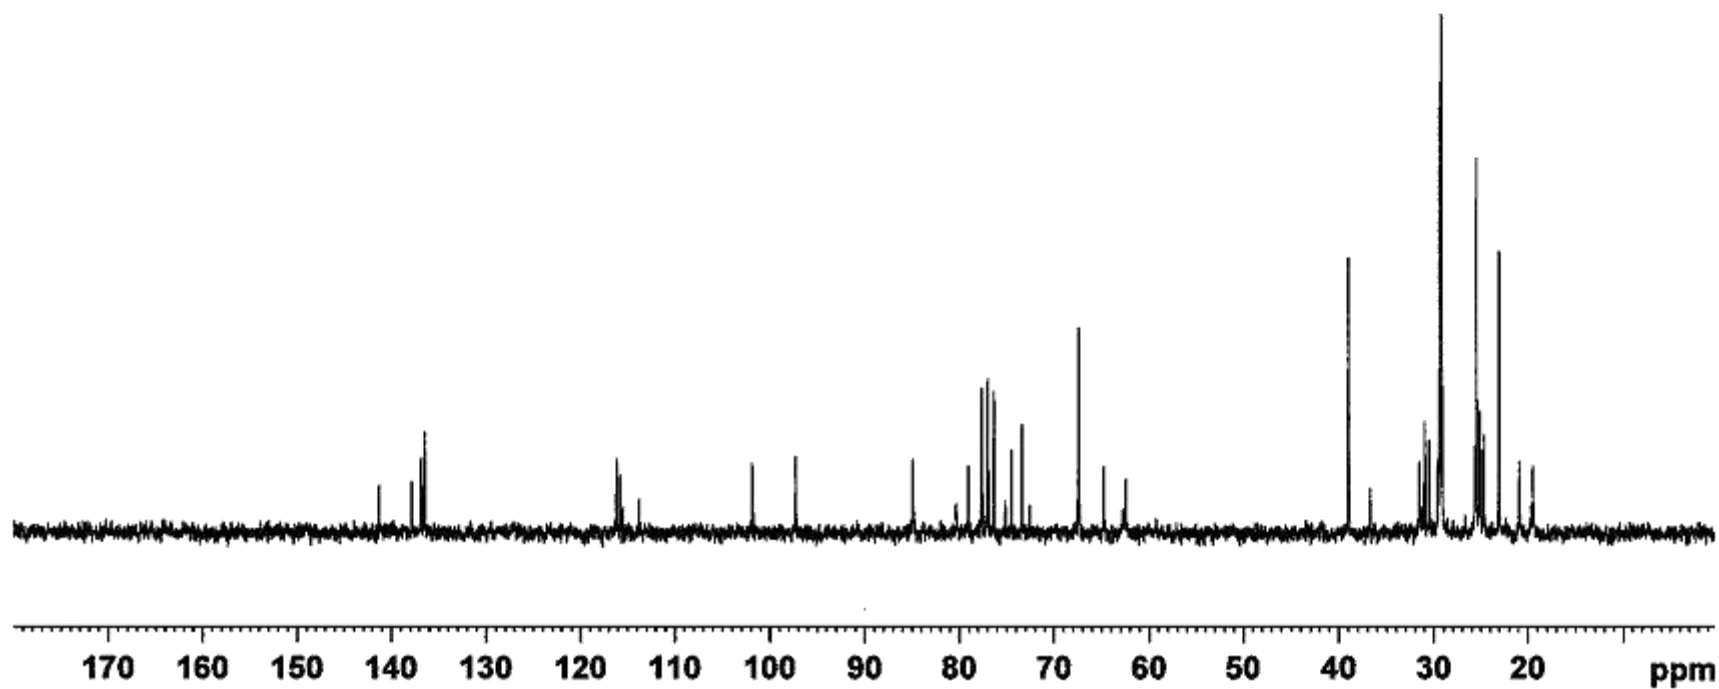

7.250  
6.414  
6.405  
6.328  
6.319  
6.147  
6.096  
6.061  
6.010  
5.936  
5.902  
5.868  
5.850  
5.816  
5.805  
5.796  
5.754  
5.745  
5.273  
5.239  
5.207  
5.198  
5.153  
5.003  
4.971  
4.939  
4.908  
4.402  
4.379  
4.055  
4.033  
3.981  
3.928  
3.897  
3.659  
3.617  
3.546  
3.508  
3.489  
1.828  
1.802  
1.783  
1.525  
1.503  
1.428  
1.240  
1.208

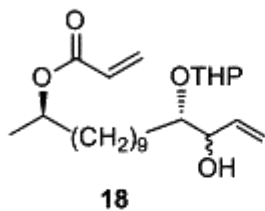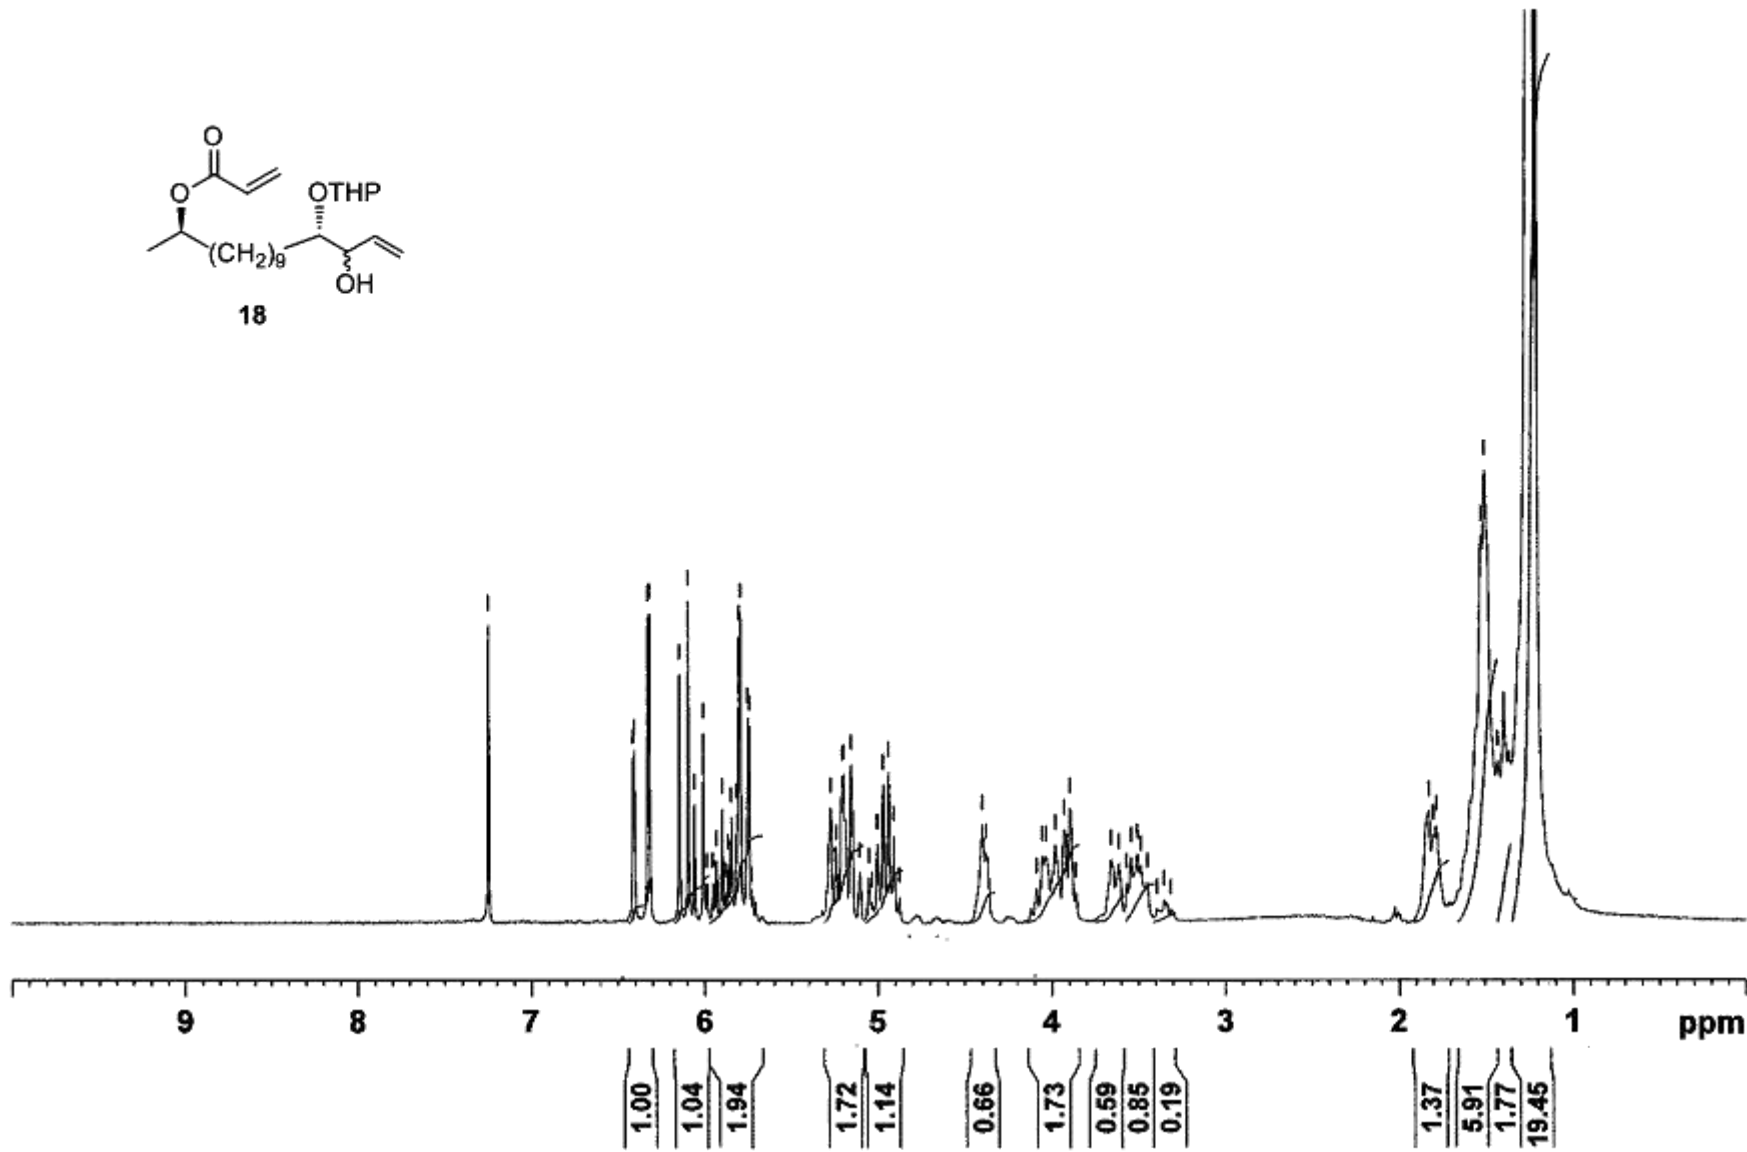

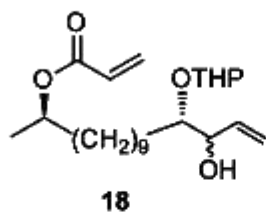

165.79

141.34

137.03

136.66

130.03

128.95

117.20

116.46

114.22

102.33

101.97

85.39

77.64

77.00

76.36

75.54

74.80

73.00

71.11

65.19

36.93

35.80

31.97

31.21

29.57

29.35

29.28

25.87

25.24

24.84

22.56

21.23

19.83

14.00

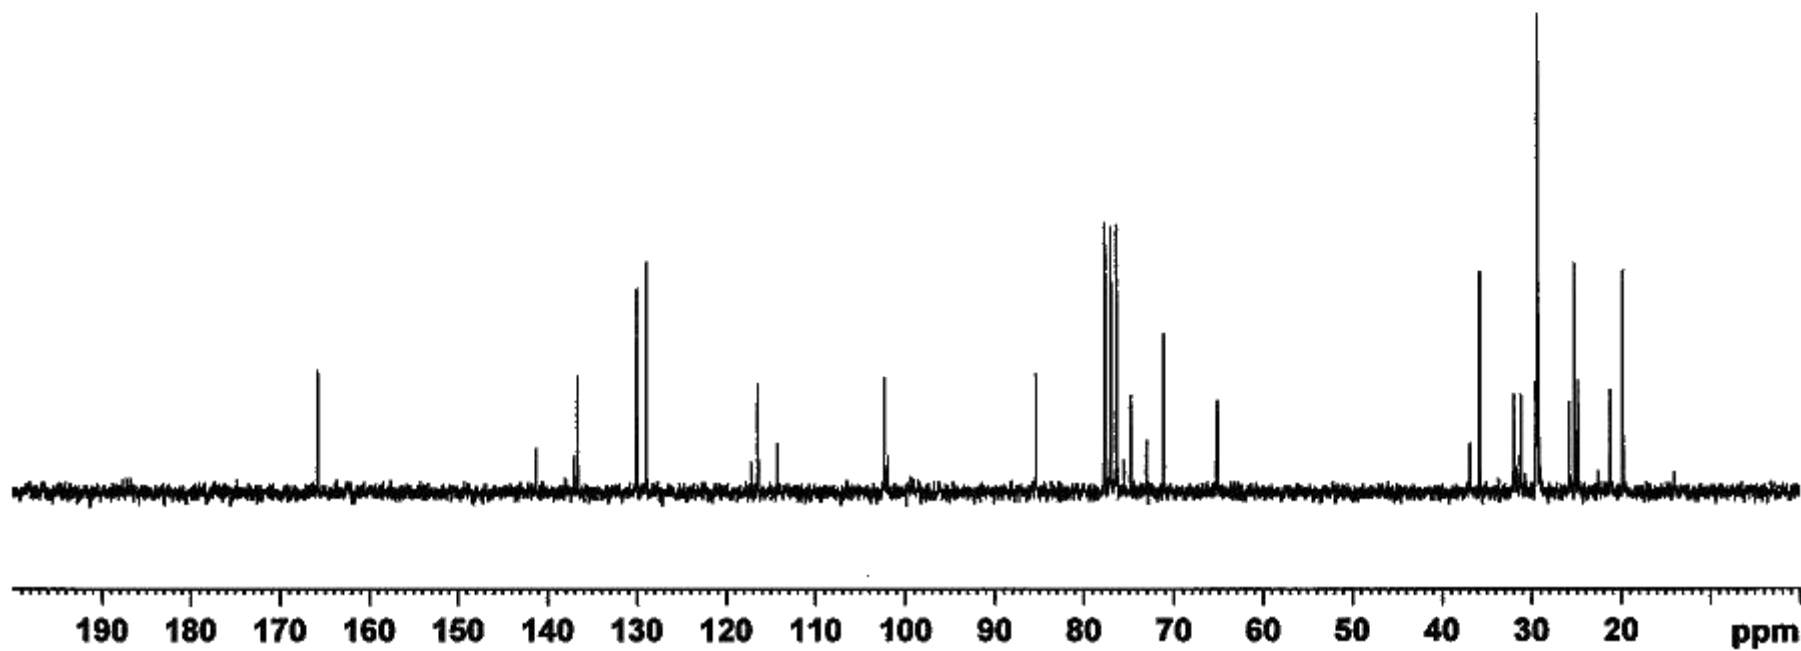

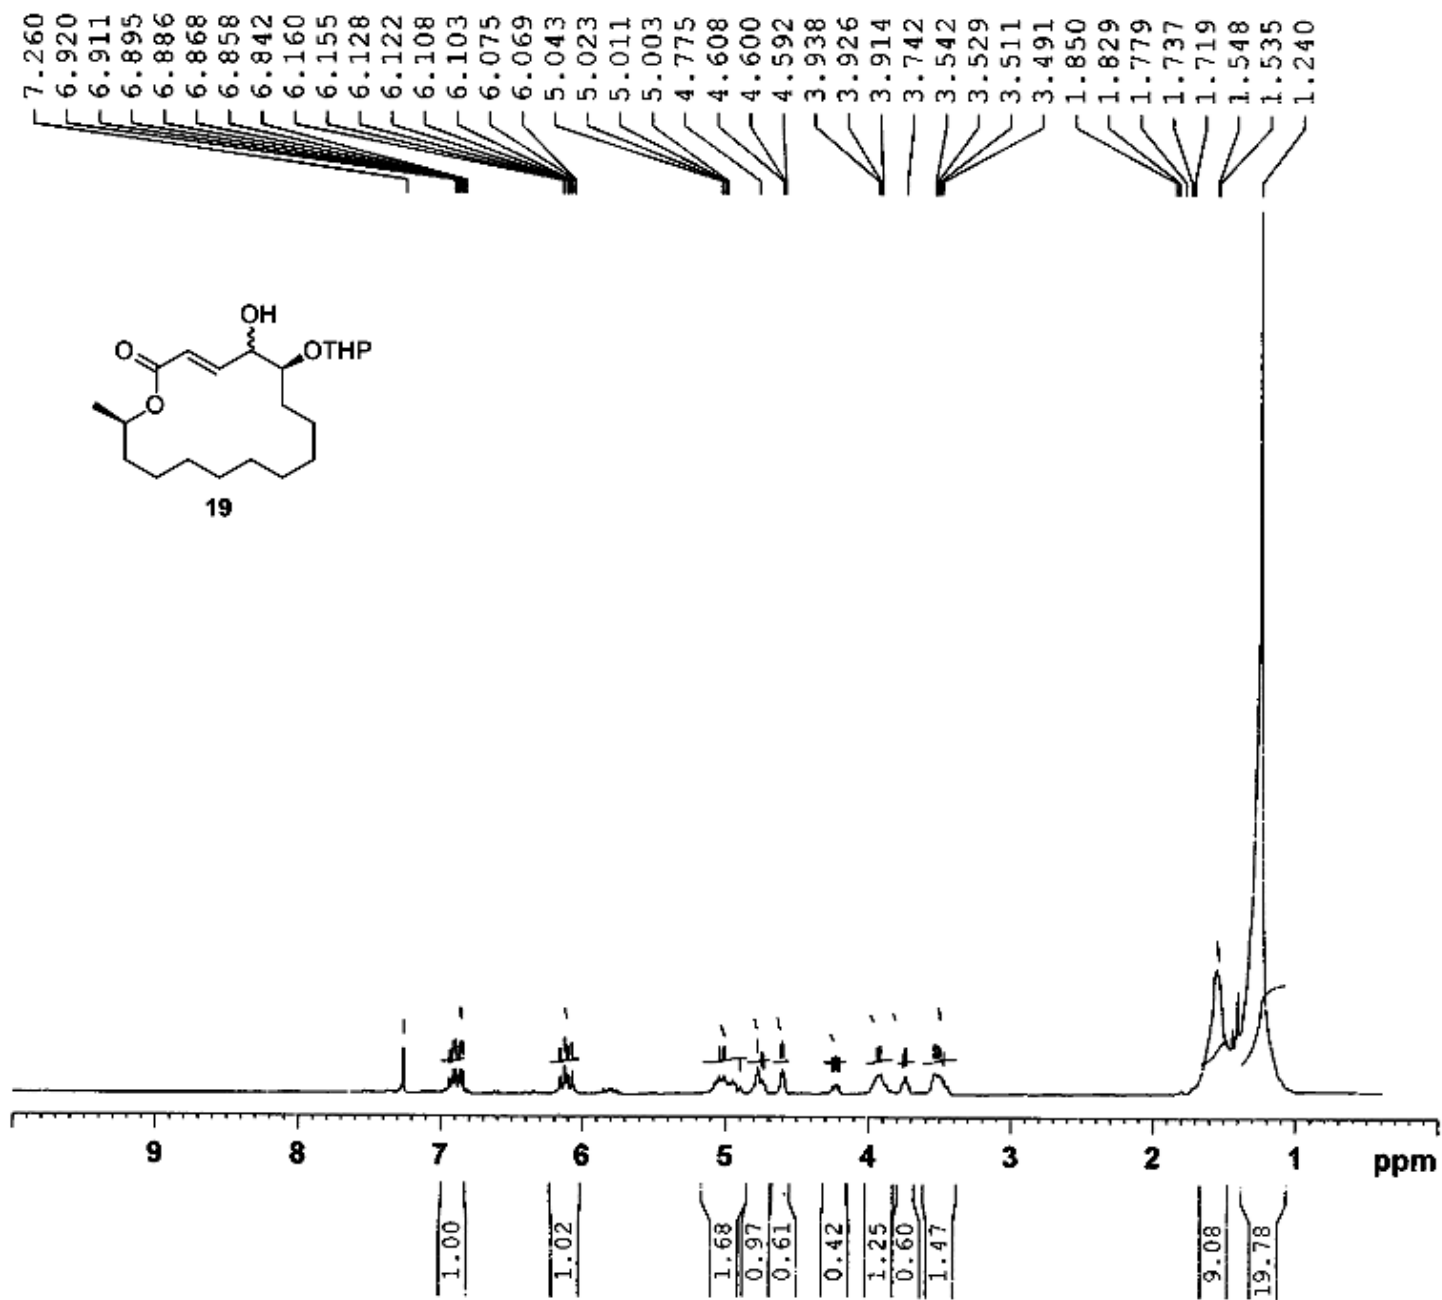

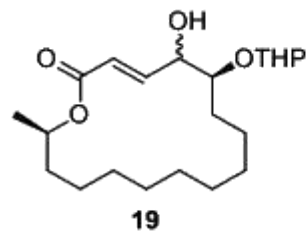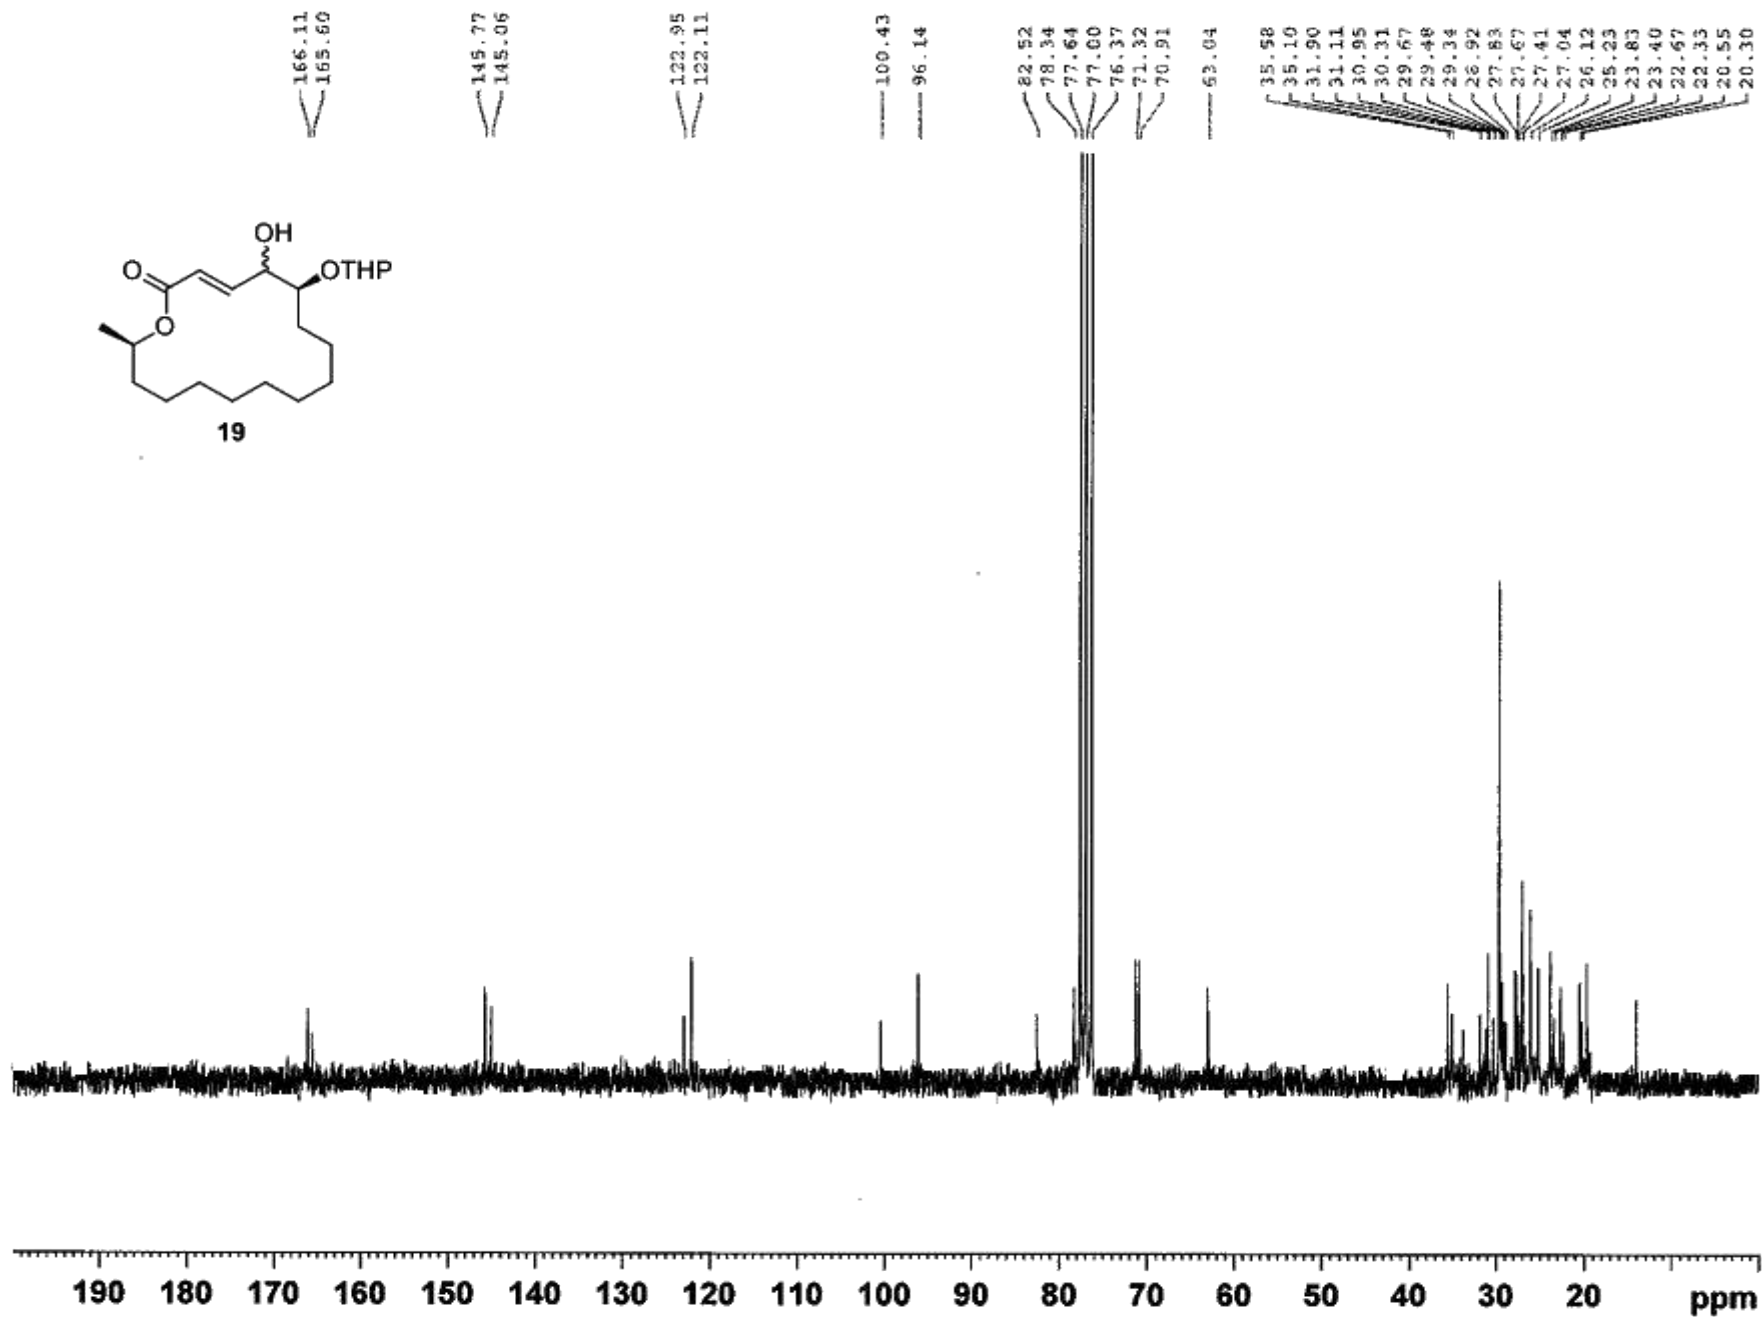

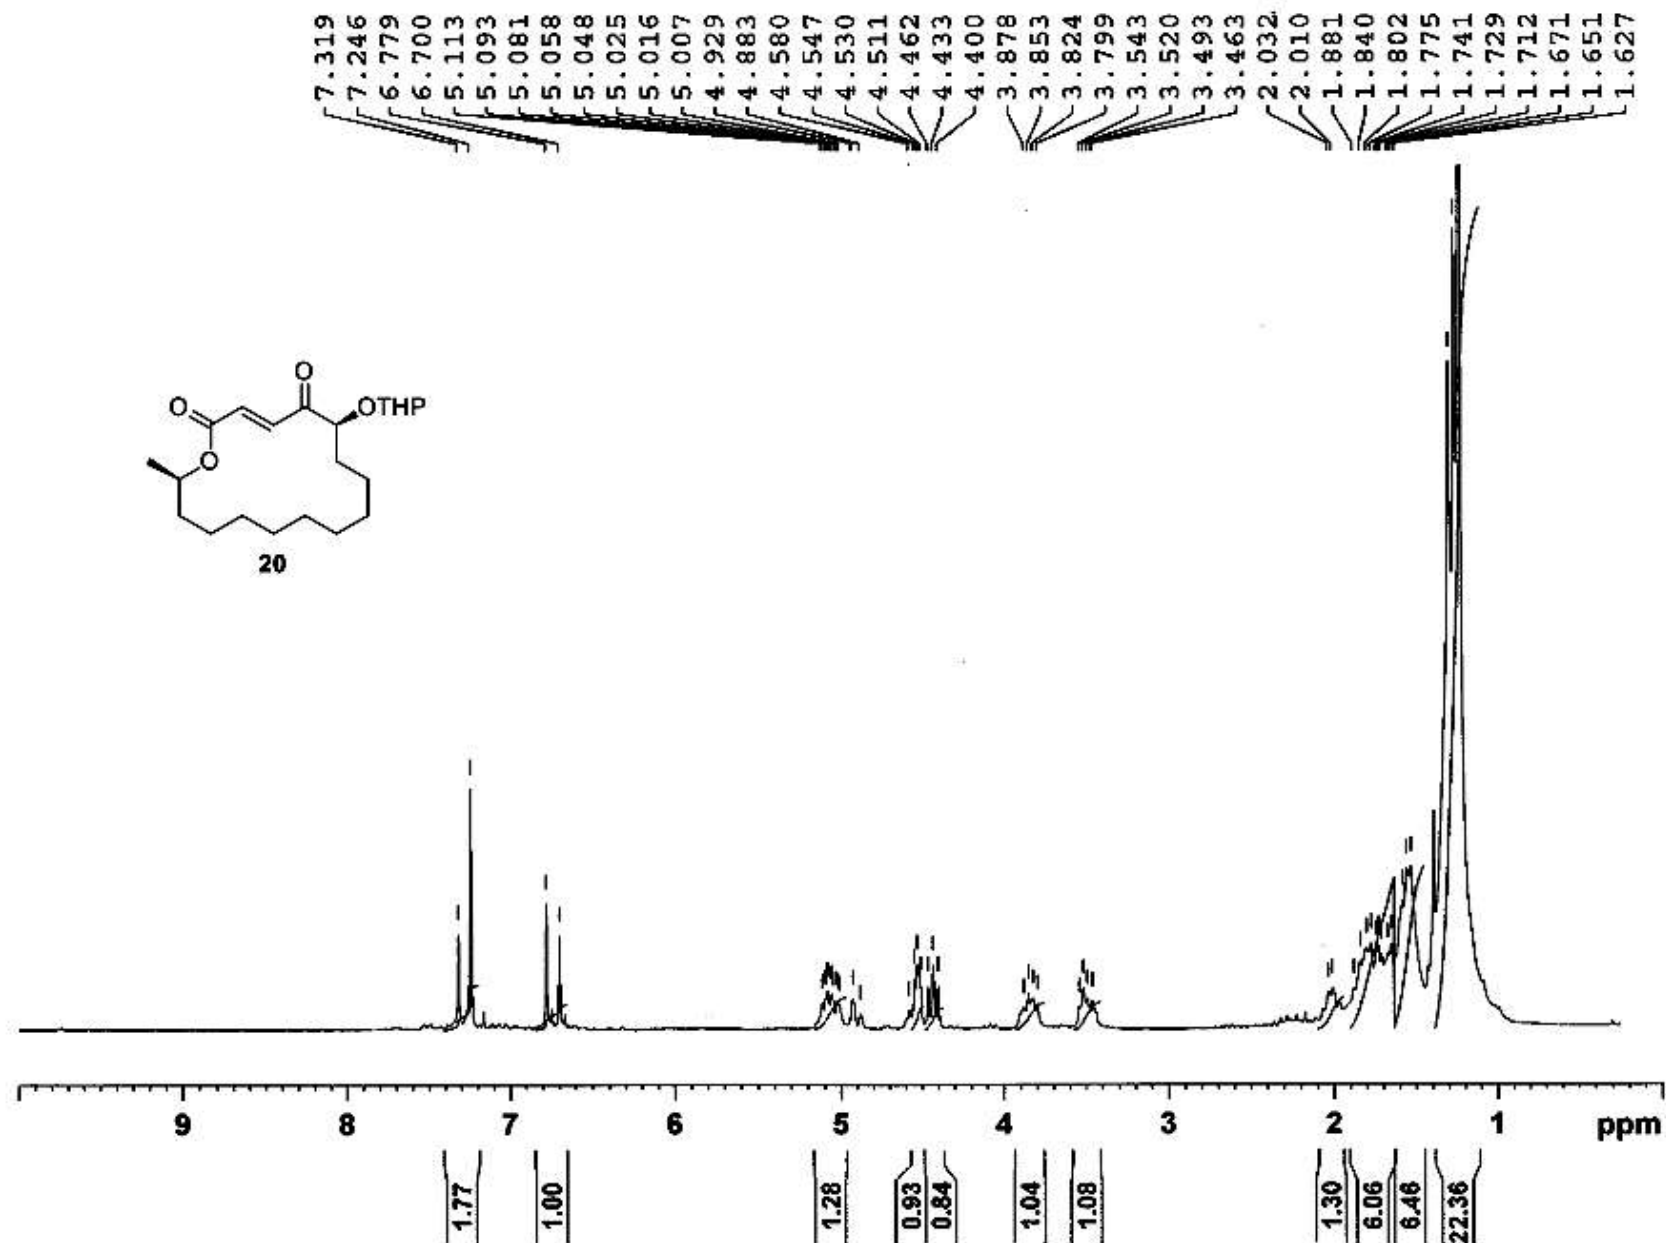

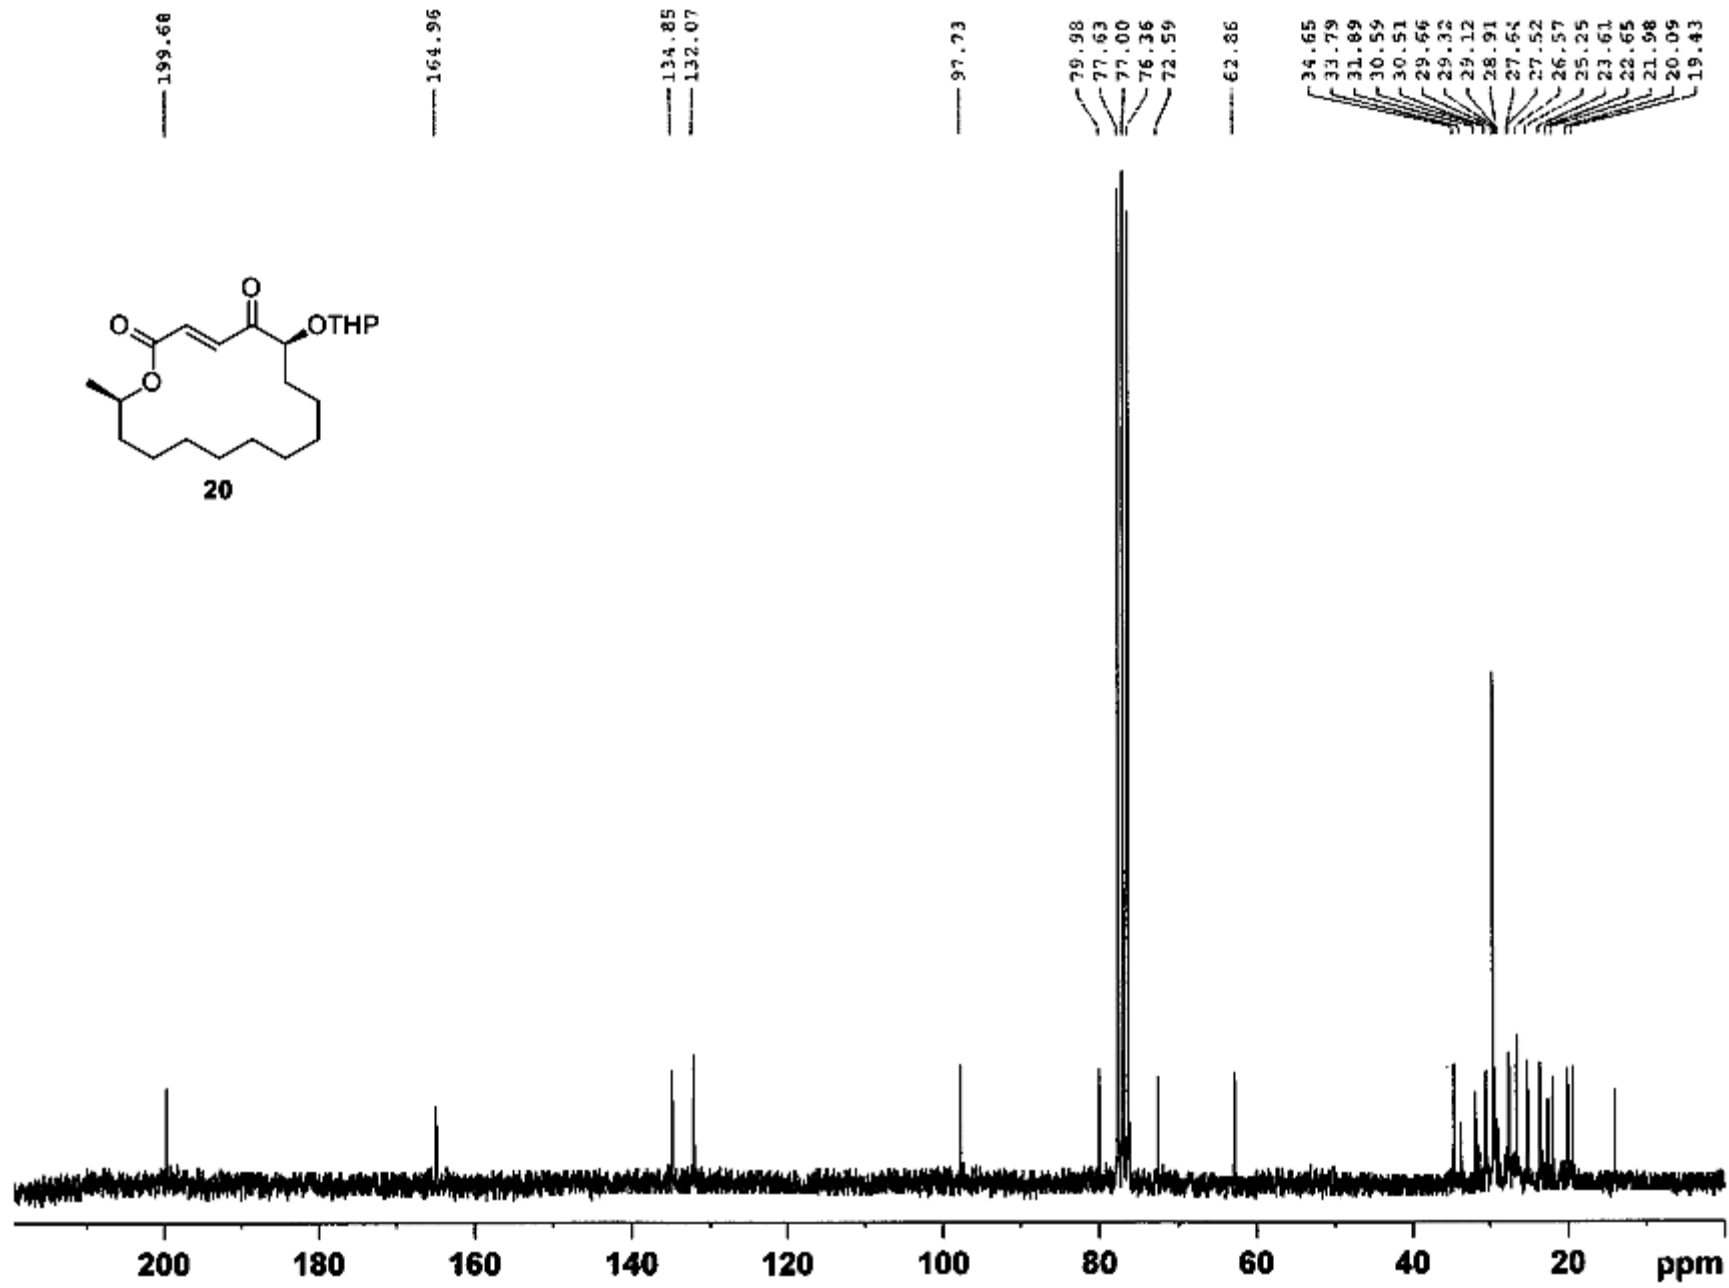



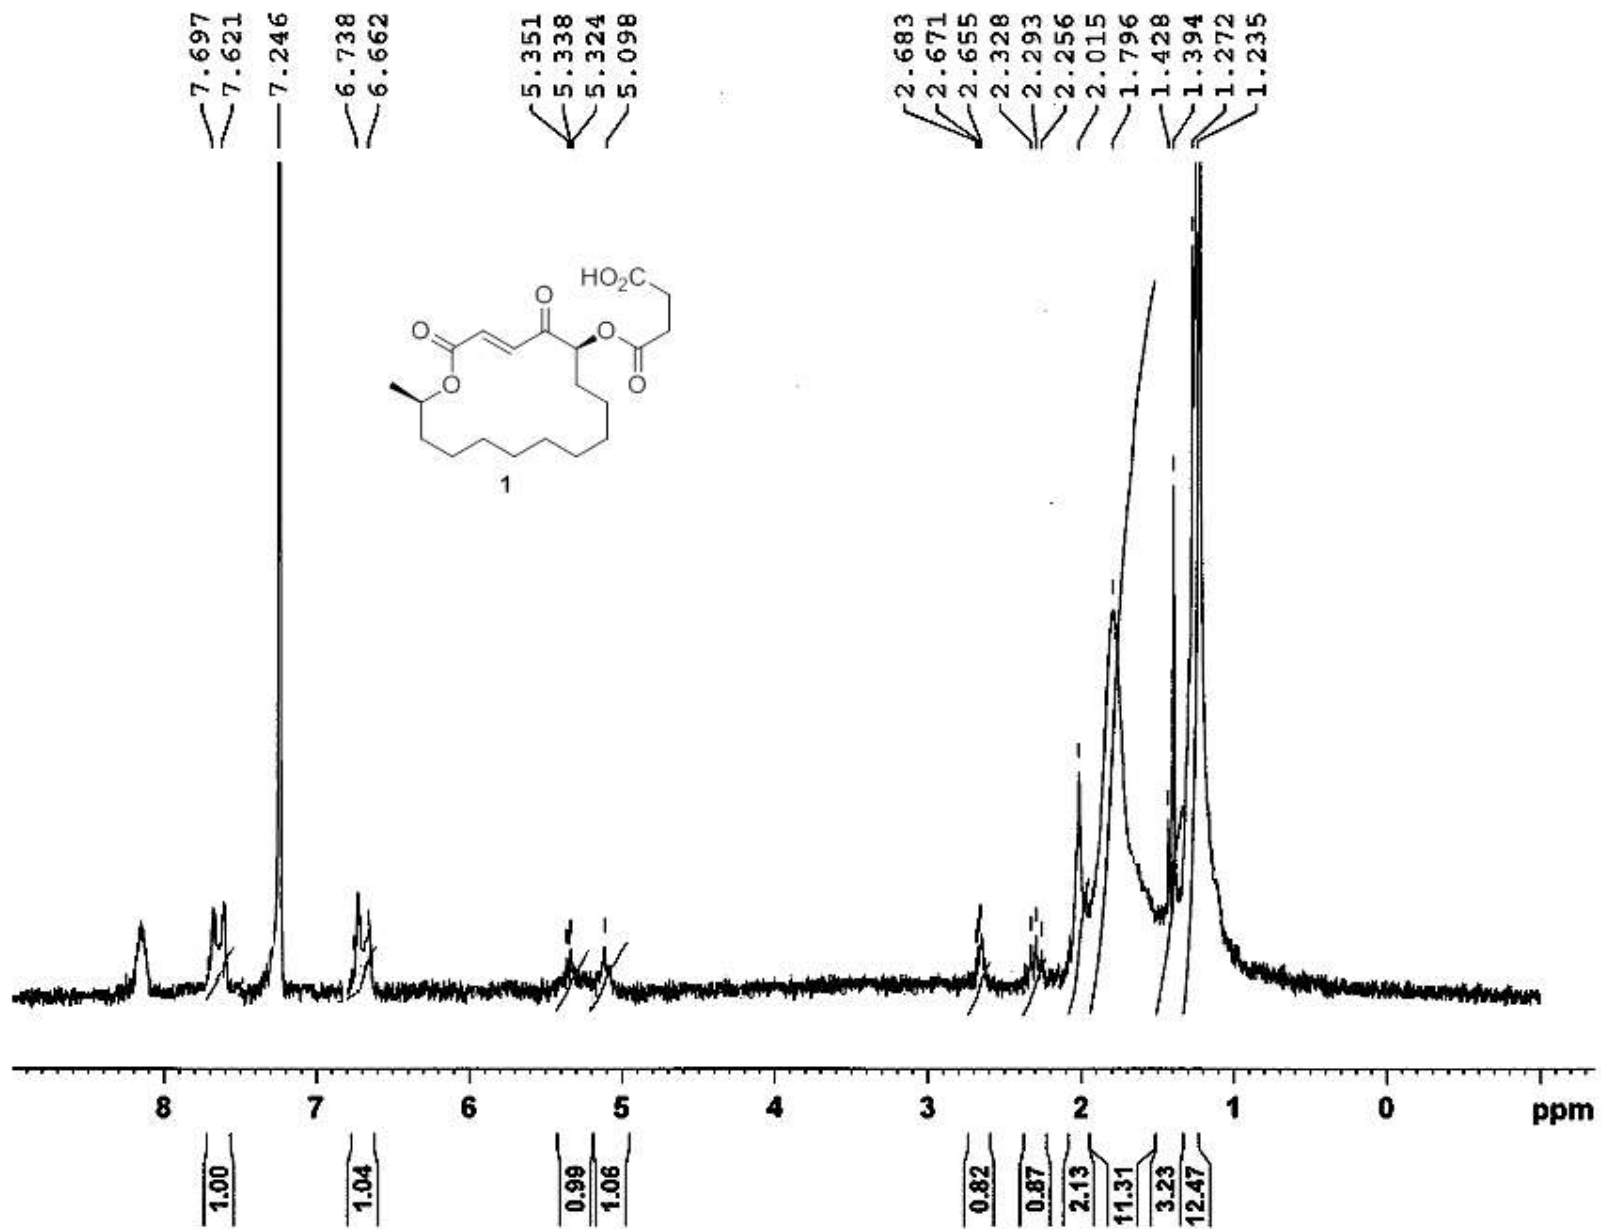

Supplement: c4ra05399k1.pdf [file c4ra05399k1.pdf]
